# Supplementary material for: International normative data for paediatric foot posture assessment: a cross-sectional investigation
Source: PubMed Central journal article supplement — BMJ Open. 2019 Apr 14;9(4):e023341. doi: 10.1136/bmjopen-2018-023341 (PMC6500282; doi:10.1136/bmjopen-2018-023341), 2019-04-14
Supplement: bmjopen-2018-023341.draft_revisions.pdf [file bmjopen-2018-023341.draft_revisions.pdf]

# BMJ Open

BMJ Open is committed to open peer review. As part of this commitment we make the peer review history of every article we publish publicly available.

When an article is published we post the peer reviewers' comments and the authors' responses online. We also post the versions of the paper that were used during peer review. These are the versions that the peer review comments apply to.

The versions of the paper that follow are the versions that were submitted during the peer review process. They are not the versions of record or the final published versions. They should not be cited or distributed as the published version of this manuscript.

BMJ Open is an open access journal and the full, final, typeset and author-corrected version of record of the manuscript is available on our site with no access controls, subscription charges or pay-per-view fees (<http://bmjopen.bmj.com>).

If you have any questions on BMJ Open's open peer review process please email [editorial.bmjopen@bmj.com](mailto:editorial.bmjopen@bmj.com)

# BMJ Open

## International normative data for paediatric foot posture assessment: a large-scale cross-sectional investigation.

|                               |                                                                                                                                                                                                                                                                                                                                                                                                            |
|-------------------------------|------------------------------------------------------------------------------------------------------------------------------------------------------------------------------------------------------------------------------------------------------------------------------------------------------------------------------------------------------------------------------------------------------------|
| Journal:                      | <i>BMJ Open</i>                                                                                                                                                                                                                                                                                                                                                                                            |
| Manuscript ID                 | bmjopen-2018-023341                                                                                                                                                                                                                                                                                                                                                                                        |
| Article Type:                 | Research                                                                                                                                                                                                                                                                                                                                                                                                   |
| Date Submitted by the Author: | 04-Apr-2018                                                                                                                                                                                                                                                                                                                                                                                                |
| Complete List of Authors:     | Gijon-Nogueron, Gabriel; University of Malaga, Nursing and Podiatry<br>Martinez-Nova, Alfonso; Universidad de Extremadura, Nursing and Podiatry<br>Alfageme-Garcia, Pilar; Universidad de Extremadura, Nursing and Podiatry<br>Montes-Alguacil, Jesus; Universidad de Extremadura, Nursing and Podiatry<br>Evans, Angela Margaret; La Trobe University College of Science Health and Engineering, Podiatry |
| Keywords:                     | foot, posture, children                                                                                                                                                                                                                                                                                                                                                                                    |
|                               |                                                                                                                                                                                                                                                                                                                                                                                                            |

SCHOLARONE™  
Manuscripts

Peer Review Only

1  
2  
3 **International normative data for paediatric foot posture assessment: a large-scale cross-**  
4 **sectional investigation.**  
5

6  
7 [Short title: Children's flatfeet – what is normal?]  
8

9  
10 \*Gabriel Gijon-Nogueron<sup>1</sup>, PhD ([gagijon@uma.es](mailto:gagijon@uma.es))  
11

12 Alfonso Martinez-Nova<sup>2</sup>, PhD ([podoalf@unex.es](mailto:podoalf@unex.es))  
13

14 Pilar Alfageme-Garcia<sup>2</sup>, PhD ([palfagemeg@unex.es](mailto:palfagemeg@unex.es))  
15

16 Jesus Montes-Alguacil<sup>1</sup>, PhD ([jesmonalg@uma.es](mailto:jesmonalg@uma.es))  
17

18 Angela Margaret Evans<sup>3</sup>, PhD ([angela.Evans@latrobe.edu.au](mailto:angela.Evans@latrobe.edu.au))  
19  
20

- 21  
22  
23 1. Department of Nursing and Podiatry. University of Malaga, Spain  
24  
25 2. Department of Nursing. University of Extremadura, Spain  
26  
27 3. Discipline of Podiatry, College of Science, Health and Engineering, La Trobe  
28  
29 University, Bundoora, Melbourne, 3086, Australia  
30  
31

32  
33 First and second author contributed equally in the study/paper  
34

35  
36 \*Corresponding author: Gabriel Gijon-Nogueron, Department of Nursing and Podiatry,  
37 University of Malaga, Spain. Email: [gagijon@uma.es](mailto:gagijon@uma.es)  
38

39  
40 Word count: 2312; Abstract: 199; References: 25; Tables: 5; Figures 1  
41

42  
43 **Financial support:** No external funding for this manuscript.  
44

45 **Financial Disclosure:** The authors have no financial relationships relevant to this article.  
46

47 **Conflict of Interest:** All authors have indicated no potential conflicts of interest.  
48

49 **Ethical approval:** All procedures performed in studies involving human participants were in  
50 accordance with the ethical standards of the institutional and/or national research committee  
51 and with the 1964 Helsinki declaration and its later amendments or comparable ethical  
52 standards. (CEUMA 26/2015H).  
53  
54  
55  
56  
57

1  
2  
3 **Informed consent:** Informed consent was obtained from all individual participants (parents),  
4 whose children were included in the study.  
5

6  
7 **Data sharing statement** All available data can be obtained by contacting the corresponding  
8 author.  
9

10  
11 **Contributors** GG-N, AM-N, and AME contributed to the conception of this study. GG-N,  
12 AM-N, and AME did the statistical analysis. Data collectors were collected in Spain JM-A  
13 and PG-A and in Australia AME. GG-N, AM-N, PG-A, JM-A and AME were involved in the  
14 writing and in the review of the manuscript.  
15  
16  
17  
18  
19  
20  
21  
22  
23  
24  
25  
26  
27  
28  
29  
30  
31  
32  
33  
34  
35  
36  
37  
38  
39  
40  
41  
42  
43  
44  
45  
46  
47  
48  
49  
50  
51  
52  
53  
54  
55  
56  
57  
58  
59  
60

## Abstract

**Objectives:** Frequent confusion about paediatric foot posture, and a lack of defined values, result in overdiagnosis of 'flatfoot', or pronated foot, and unnecessary treatment. The objective of this study was to establish international reference data for foot posture across childhood, and influence of Body Mass Index (BMI) on paediatric foot posture.

**Design:** Cross-sectional study

**Setting and participants:** The dataset comprised 3217 healthy children, aged from three to 15 years. Contributing data were acquired from Spain, UK, and Australia.

**Interventions :** Foot posture was described by means and z-score of the foot posture index (FPI) and the height and weight of each subject was measured and the body mass index (BMI) was calculated

**Results:** The mean FPI score was 4.11 (SD 2.92) and 4.20 (3.00) for left and right feet respectively, ranging from -4 to +12 (left and right). Flatfeet (FPI  $\geq$ +6) were found in 1087 (33.7%) and non-flatfeet (FPI <+6) in 1776 (55.2%). FPI  $\geq$  +10 was found in 127 children (3.9%). Approximating 20% of children were overweight/obese, but correlation between BMI and FPI was weak and inverse ( $r = -0.066$ ,  $p < 0.01$ ), refuting the relationship between increased body mass and flatfeet.

**Conclusions:** Pronated or 'flat', is the normal foot posture of childhood, with a wide range of normal variation. A supinated foot posture is an abnormal finding in children aged less than five years. This reference data enables standardised clinical assessment.

### Strengths and limitations of this study

- This study confirms the pronated foot as the normal foot posture of childhood
- Clinicians must move beyond flatfoot posture appearance as an indicator for intervention
- The sample does not balance the number of children from each country

- The disproportionate numbers of children within each age year group

**Key Words:** Foot, Children, Posture

For peer review only

## Introduction

Paediatric foot posture is a common parental concern, a frequent presentation to clinicians, and an area of dispute regarding the need for treatment [1]. The term 'flatfoot', has referred to a foot which is nearly or completely contacting the ground [2], and has been evaluated using foot posture [3], footprints [4], radiological and anthropometric measures [5] and is often poorly defined [6].

There is no well-constructed, agreed reference for normal paediatric foot posture as the child's foot grows and changes across childhood [7]. Children's foot posture has been interpreted with footprint assessments in many studies, with inference of problematic 'flatfoot' when footprint area increases. Throughout early childhood, children continue to develop a skeletal medial longitudinal foot arch [8], different from the adult population [9], and altered children's foot posture must be evaluated in context of developmental stage and the presence/absence of systemic influences, such as Down or Marfan's syndromes.

Despite the fact that paediatric flatfoot is a frequent concern [1, 10], the evidence for treatment is weak. The paucity of definition for 'flatfoot' contributes to a lack of consensus for best practice [11–13]. There is no 'gold standard' for categorising foot type, and few clinical measures are validated in children. Further, it is common for clinicians to make diagnostic decisions based on their personal clinical experience [14]. The availability of normal reference data for paediatric foot posture, based on a valid measure, will provide a 'benchmark' for clinical evaluation of this frequent clinical concern.

Ten years ago the Foot Posture Index (FPI) [15] emerged with the objective to standardise the assessment of foot posture in stance across three discrete foot regions (rearfoot, midfoot, forefoot). Both Evans et al [16] and Gijon-Nogueron et al [17] have previously utilised the FPI to investigate the paediatric foot. The FPI is a quick, and easy-to-use clinical tool, not requiring equipment. The FPI is demonstrably repeatable and validated [3].

## Methods

### Data acquisition

Data was acquired from multiple sources where the FPI had been assessed in healthy children, who were recruited for screening studies or who acted as comparative controls. Three datasets were acquired from the authors' previous works (n= 1032, n=1457, n = 728) [9, 16, 17]. Overall, the datasets comprised foot posture measures from Spain (n=2489), the UK (n = 225), and Australia (n = 503), to realise an amalgamated dataset of 3217 observations for FPI in children aged from three to 15 years.

### Participants

The inclusion criterion across studies was that the children be 'healthy' and aged between three and 15 years. Exclusion criteria were: foot pain at the time of examination, history of injury to the lower limbs (eg musculoskeletal injuries during the previous six months), congenital foot abnormalities, cerebral palsy, motor dysfunction, or foot surgery. Informed consent had been gained from parents/carers of the children for study participation. All studies contributing data to the amalgamated dataset were conducted in accordance with the Declaration of Helsinki and was approved by University Human Ethics Committees in each country (Universities of: Malaga, Extremadura, South Australia).

### Protocol

Foot posture was assessed using the standard protocol for the FPI [18]. The FPI consists of six items referring to positions of the forefoot, midfoot and hindfoot, and the three planes of motion: 1) talar head palpation; 2) symmetry of supra and infra lateral malleolar curvature; 3) inversion/eversion of the calcaneus; 4) prominence in the region of the talus-scaphoid joint; 5) height of the medial longitudinal arch; 6) abduction/adduction of the forefoot. The FPI score may range from -12 (highly supinated) to +12 (highly pronated).

The BMI was calculated from the children's height and weight, calculated as,  $BMI = \text{weight}(\text{kg})/\text{height}(\text{m})^2$ . In Spain, the Orbegozo[19] BMI classification is used and in Australia, the Australian Health Survey guide for BMI is used [20]. Accordingly, we classified children by their BMI score, using the systems proposed by Orbegozo and Australian Health Survey, and allocated to one of four categories: underweight - percentile less than 3 ( $P < 3$ ), normal weight - percentile between 3 and 90 ( $P3-90$ ), overweight - percentile between 90 and 97 ( $P90-97$ ) and obesity - percentile greater than 97 ( $P > 97$ ), based on BMI, and according to age.



### **Patient involvement**

No patients were involved in setting the research question or the outcome measures, nor were they involved in the design or conduct of the study. No patients were asked to advise on interpretation or writing up of results. There are no plans to disseminate the results of the research to study participants.

### **Data analysis**

Data were entered and all analyses were performed using constructed data sets in SPSS version 24 (SPSS Inc, Chicago, Illinois) software packages. Testing for normality using a Kolmogorov–Smirnov test, found non-normally distribution of all data, indicating the suitability of the data for non-parametric analysis (Mann–Whitney U and Kruskal–Wallis). Descriptive statistics (mean, standard deviation, minimum, maximum, frequencies) were used to examine the basic anthropometrical characteristics of the study populations. The FPI was analysed as continuous data, rather than as z-score data, and analysis of variance was conducted to determine the association between the different BMI groups (underweight, normal, overweight and obesity), gender, age, and the FPI for left foot. To preserve the independence of data[21], and based on the strong correlation between FPI scores for left and right feet [22], only the right foot (chosen at random) was used in the statistical analyses, applying the Games-Howell post hoc correction to identify significant differences. The significance level was set at  $p < 0.05$ , and all the analyses and tests were two-sided.

## Results

The mean age of the study population of 3217 children was 8.67 years (SD 2.02), ranging from three years to 15 years. The mean BMI was 19.08 kg/m<sup>2</sup> (SD 4.05), ranging from 10.57 kg/m<sup>2</sup> to 39.14 kg/m<sup>2</sup>. The mean FPI score was 4.11 (SD 2.92) and 4.20 (3.00) for left and right feet respectively, with whole scores ranging from -4 to +12 (left and right). The total study population gender distribution was 1699 male, 1518 female (Table 1).

In the study population of 3217 children, flatfeet (FPI  $\geq$ +6) were found in 1087 (33.7%) children and non-flatfeet (FPI <+6) in 1776 (55.2%) children and FPI  $\geq$  +10 yielded flatfeet in 127 (3.9%) cases.

There was strong correlation between FPI scores on left and right sides ( $r = 0.9014$ ,  $p < 0.01$ ), from which the left side was arbitrarily used for subsequent analyses. Similarly, we found little gender bias, with the mean FPI for males 4.2 (2.9), range -4 to +12, and for females, mean FPI 3.99 (2.9), range -4 to +12. The correlation between FPI and gender used z-score was very weak, if significant ( $F=4.073$ ,  $p=0.04$ ). Between countries there was significant difference ( $p<0.01$ ), with Spanish children's mean FPI = 4.00(2.9), and in UK and Australian children combined, the FPI = 4.9(3.3).

Table 2 used designated FPI categories to define and explore the range of foot posture across childhood.

Table 3 displays the frequency of FPI scores for each year of age.

Table 4 shows the standard deviation of the mean FPI scores, and enables the mean FPI and one and two standard deviations above and below to be referenced as normally expected for each year of age.

Figure 1 displays and explores the relationship between foot posture and age across childhood for the study population, using error bars for average Z-scores (95% confidence intervals).

1  
2  
3 Significant correlation was found between BMI and age ( $r = 0.276$ ,  $p < 0.01$ ). The correlation  
4 between BMI and FPI, whilst also statistically significant, was very weak and also inverse ( $r$   
5  $= -0.066$ ,  $p < 0.01$ ), refuting the strength of relationship between body mass and foot posture.  
6  
7 BMI cut-points and percentiles were used to define underweight, normal weight, overweight,  
8 and obese. Within the total 3217 children, 142 (4.4%) were underweight, 2407 (74.8%) were  
9 normal weight, 469 (16.1%) were overweight, and 199 (6.2%) were obese.  
10  
11 Combining categories, 668 (20.8%) of all children were overweight or obese.  
12  
13  
14

15  
16 The foot posture categories were analysed for distribution across the BMI categories (Table  
17 5). The largest overlap of FPI and BMI categories were: normal weight / normal FPI range,  
18  $n = 1325$ ; normal weight / pronated foot posture,  $n = 728$ ; overweight or obese / normal foot  
19 posture,  $n = 383$ .  
20  
21

22 Exploring the association between the pronated foot and BMI across FPI ranges showed that  
23 960 children had foot posture that was pronated,  $FPI > 6$ . Of these, 44 (4.5%) were  
24 underweight, 728 (75.8%) were normal weight, 188 were overweight, or obese (19.5%).  
25  
26 Further, 127 children had highly pronated foot posture,  $FPI > 10$ . Of these, 12 (9.4%) were  
27 underweight, 94 (74.0%) were normal weight, and 21 (16.5%) were overweight or obese.  
28  
29  
30  
31  
32

### 33 **Discussion**

34  
35 This study is the largest investigation of paediatric foot posture using the FPI, paediatric  
36 anthropometry using BMI, and exploration of both foot posture across childhood with the  
37 regularly cited influence of increased body weight, as potentiating factors for flatfeet. This  
38 investigation of paediatric foot posture includes children aged from three to 15 years,  
39 superseding previous, smaller or age-limited, studies[16, 17].  
40  
41  
42  
43  
44

45 This study confirms the pronated foot as the normal foot posture of childhood, with mean FPI  
46 of +4, and 3-point standard deviation, such that average normal FPI range for children aged  
47 three to 14 years was between the FPI range +1 to +7 (mean  $\pm$  SD). These findings concur  
48 with the recent cross-sectional investigation of 1762 children aged six to 11 years [17].  
49  
50 Similarly to Gijon-Nogueron et al [17], we found that the mean FPI scores reduced with age,  
51 in non-linear pattern, and within a wide range. The standard deviation approximated 75% of  
52 the FPI mean at every age, confirming the considerable and normal variation in foot posture  
53 across childhood.  
54  
55  
56  
57  
58  
59  
60

1  
2  
3  
4 The greatest number of children across all ages (n=1776) displayed FPI within the 0 to +5  
5 FPI range, ie normal foot posture. Next common were children within the FPI range +6 to +9,  
6 ie pronated feet (n=960). The least common FPI ranges were: -1 to -4, supinated foot posture  
7 (n=354) and >+10, highly pronated (n=127), indicative of the foot types that should arrest the  
8 attention of clinicians, as less frequent presentations. Flatfoot or pronated foot posture was  
9 generally found to decline with age, but mean reduction was non-linear and modest, from +6  
10 at age three years, to +3 at 14 years. Importantly, the normal FPI range of variation was  
11 broad: -1 to +11 at age three years, and FPI +3 to +9 at age 14 years.  
12  
13  
14  
15  
16  
17  
18

19 The relationship between increased BMI and flatfeet is again refuted by the findings of this  
20 study which found that only 16.5% of the 127 children (4%) with highly pronated feet, were  
21 also overweight or obese (Table 5). Similar results have been found in other recent studies  
22 [16] [23], refuting many older studies which asserted that heavier, fatter children have flatter  
23 feet. Importantly, the older studies all assessed foot posture using a footprint based method of  
24 foot posture assessment [4, 7, 24], a method which may well represent adipose tissue area  
25 spread with weight bearing, rather than anatomical foot morphology, more directly evaluated  
26 using the FPI [15, 16]. Whilst it is concerning to find that 21% of the children in this study  
27 were overweight or obese, the association with flatfeet is again refuted.  
28  
29  
30  
31  
32  
33  
34

35 The availability of average FPI whole scores, enables clinicians to inform parents as to what  
36 is “average” and what is “normal” at any age, as statistically defined. The availability of FPI  
37 scores within one standard deviation above and below the mean, enables clinicians to confirm  
38 for parents that their child falls within 68% of children for a specific age. Further, FPI scores  
39 within two standard deviations above and below the mean, enable clinicians to inform parents  
40 that their child is still within the normal 95% range, and similar to 27% of same age children.  
41 Such reference data helps appreciation of the range of “normal” for foot posture, similarly to  
42 that for the onset of independent walking (age range of 10 to 16 months, mean age  
43 approximating 12 to 13 months)[8].  
44  
45  
46  
47  
48  
49

50 The focus of this investigation has been to better elucidate the normal range of foot posture  
51 across childhood, as is commonly assessed by many clinicians using the FPI. Simultaneously,  
52 the authors aimed to provide clinicians with a robust reference guide of normal values within  
53 statistical bounds. The culmination of this aim is provided as a reference Table (Table 4). The  
54 scale of this investigation renders its findings stronger than those of the 1000 Norms protocol  
55  
56  
57  
58  
59  
60

1  
2  
3 for most age (year) groups, as the comparative number of participants reveals. The 1000  
4 Norms protocol will include: ages 3 to 9 years, 140 (20 per age year); ages 10 to 19 years,  
5 160 (16 per age year)[25]. By comparison, this study informs for: ages 3 to 9 years, 2796 (20  
6 to 764 per age year); ages 10 to 15 years, 1304 (1 to 634 per age year).  
7  
8  
9

10  
11 Clinicians must move beyond flatfoot posture appearance as an indicator for intervention, and  
12 instead appreciate the range of normal variation, and only respond to more pertinent factors  
13 as outlined by the 3QQ (3 Quick Questions) screening tool (addressing pain presentations,  
14 left versus right limb symmetry, paediatric age range)[10]. Clinicians need to appreciate the  
15 normal range of many developmental features, yet simultaneously be alert to the level at  
16 which clinical concern should be raised. The Tabulated reference guide provided from this  
17 study, will be of immediate clinical relevance.  
18  
19  
20  
21  
22  
23

24 The striking finding of this study is not that paediatric flexible flatfoot is largely normal, it is  
25 that the supinated paediatric foot is far more likely to be abnormal, especially at age three and  
26 four years. An FPI of -2 or less, must be considered “abnormal” until shown otherwise, as it  
27 is outside normal range at any age.  
28  
29  
30  
31

32 Limitations of this investigation include the cross-sectional nature of the design and the  
33 ethnicity of participants (largely Caucasian) and the sample does not balance the number of  
34 children from each country. Prospective data would avail stronger evidence of foot posture  
35 change over time. A further limitation is the disproportionate numbers of children within  
36 each age year group, although this is pragmatically ameliorated to an extent as mid-  
37 childhood, a time a frequent parent concerns, is best represented.  
38  
39  
40  
41  
42  
43  
44  
45  
46  
47  
48  
49  
50  
51  
52  
53  
54  
55  
56  
57  
58  
59  
60

## Conclusions

This is the largest study of paediatric foot posture to date. Importantly, the main finding to have emerged from this study is to denounce the appearance of paediatric flatfoot as deviant. This study confirms that the 'flat' or pronated foot is the normal foot posture of childhood, with FPI score of +4 the average finding. The wide and normal range of foot posture across childhood is confirmed (16 FPI points ie -2 to +12). The reference data produced from the findings of this study will assist clinicians in standardising their assessments and decision-making.

Increased paediatric BMI was not associated with flatter feet, again questioning the validity as to what footprint-derived measures actually measure. Childhood overweight and obesity remain wider and prevalent health concerns.

The extremes of foot posture, ie the highly pronated foot and the supinated foot should produce clinical alert, and the presentation of a supinated foot posture in children less than five years of age should be regarded as abnormal.

## References

1. Carli A, Saran N, Kruijt J, Alam N, Hamdy R. Physiological referrals for paediatric musculoskeletal complaints: A costly problem that needs to be addressed. *Paediatr Child Heal*. 2012;17.
2. Drefus L, PT DPT, Kedem P, Mangan S, PT DPT, Scher D, et al. Reliability of the Arch Height Index as a Measure of Foot Structure in Children. *Pediatr Phys Ther*. 2017;29:83–8. doi:10.1097/PEP.0000000000000337.
3. Redmond AC, Crosbie J, Ouvrier RA. Development and validation of a novel rating system for scoring standing foot posture: The Foot Posture Index. *Clin Biomech*. 2006;21:89–98.
4. Chen KC, Yeh CJ, Kuo JF, Hsieh CL, Yang SF, Wang CH. Footprint analysis of flatfoot in preschool-aged children. *Eur J Pediatr*. 2011;170:611–7.
5. Chang CH, Chen YC, Yang WT, Ho PC, Hwang AW, Chen CH, et al. Flatfoot diagnosis by a unique bimodal distribution of footprint index in children. *PLoS One*. 2014;9.
6. Nemeth B. The diagnosis and management of common childhood orthopedic disorders. *Curr Probl Pediatr Adolesc Health Care*. 2011;41:2–28. doi:10.1016/j.cppeds.2010.10.004.
7. Mickle KJ, Steele JR, Munro BJ. The feet of overweight and obese young children: are they flat or fat? *Obesity (Silver Spring)*. 2006;14:1949–53.
8. Evans A. Pocket Podiatry: Paediatrics. 2010. doi:10.1016/B978-0-7020-3031-4.00017-1.
9. Gijon-nogueron G, Sanchez-rodriguez R, Lopezosa-reca E, Cervera-marin JA, Martinez-quintana R, Martinez-nova A. Normal Values of the Foot Posture Index in a Young Adult Spanish Population. *J Am Pod Med Assoc*. 2015;105:42–6.
10. Evans AM. Mitigating clinician and community concerns about children's flatfeet, intoeing gait, knock knees or bow legs. *Journal of Paediatrics and Child Health*. 2017;53:1050–3.
11. Evans AM, Rome K. A cochrane review of the evidence for non-surgical interventions for flexible pediatric flat feet. *European Journal of Physical and Rehabilitation Medicine*. 2011;47:69–89.
12. Rome K, Ashford RL, Evans A. Non-surgical interventions for paediatric pes planus. *Cochrane Database of Systematic Reviews*. 2007.
13. Kane K. Foot orthoses for pediatric flexible flatfoot: evidence and current practices among canadian physical therapists. *Pediatr Phys Ther*. 2015;27:53–9. doi:10.1097/PEP.0000000000000106.
14. Harris EJ. The Natural History and Pathophysiology of Flexible Flatfoot. *Clinics in Podiatric Medicine and Surgery*. 2010;27:1–23.
15. Redmond AC, Crane YZ, Menz HB. Normative values for the Foot Posture Index. *J Foot Ankle Res*. 2008;1:6. doi:10.1186/1757-1146-1-6.

- 1  
2  
3 16. Evans AM, Karimi L. The relationship between paediatric foot posture and body mass  
4 index: do heavier children really have flatter feet? *J Foot Ankle Res.* 2015;8:46.  
5 doi:10.1186/s13047-015-0101-x.  
6
- 7 17. Gijon-Nogueron G, Montes-Alguacil J, Alfageme-Garcia P, Cervera-Marin JA, Morales-  
8 Asencio JM, Martinez-Nova A. Establishing normative foot posture index values for the  
9 paediatric population: a cross-sectional study. *J Foot Ankle Res.* 2016;9:24.  
10 doi:10.1186/s13047-016-0156-3.  
11
- 12 18. Keenan A-M, Redmond AC, Horton M, Conaghan PG, Tennant A. The Foot Posture  
13 Index: Rasch analysis of a novel, foot-specific outcome measure. *Arch Phys Med Rehabil.*  
14 2007;88:88–93.  
15
- 16 19. Sobradillo B, Aguirre A, Aresti U, Bilbao C F-RC, Lizárraga A et al. Curvas y tablas de  
17 crecimiento (estudio longitudinal y transversal). Fundación Faustino Orbegozo Eizaguirre.  
18 2004. [http://www.aepap.org/pdf/f\\_orbegozo\\_04.pdf](http://www.aepap.org/pdf/f_orbegozo_04.pdf).  
19
- 20 20. Australian Bureau of Statistics. Australian Health Survey: First Results, 2011-12. CAT no  
21 4364055003. 2012;:1–61. doi:ABS cat. no. 4364.0.55.003.  
22
- 23 21. Redmond AC, Crane YZ, Menz HB. Normative values for the Foot Posture Index. *J Foot*  
24 *Ankle Res.* 2008;1:6. doi:10.1186/1757-1146-1-6.  
25
- 26 22. Menz HB. Analysis of paired data in physical therapy research: time to stop double-  
27 dipping? *J Orthop Sports Phys Ther.* 2005;35:477–8.  
28
- 29 23. Gijon-Nogueron G, Montes-Alguacil J, Martinez-Nova A, Alfageme-Garcia P, Cervera-  
30 Marin JA, Morales-Asencio JM. Overweight, obesity and foot posture in children: A cross-  
31 sectional study. *Journal of Paediatrics and Child Health.* 2016.  
32  
33
- 34 24. Villarroya MA, Esquivel JM, Tomás C, Moreno LA, Buenafé A, Bueno G. Assessment of  
35 the medial longitudinal arch in children and adolescents with obesity: Footprints and  
36 radiographic study. *Eur J Pediatr.* 2009;168.  
37
- 38 25. McKay MJ, Baldwin JN, Ferreira P, Simic M, Vanicek N, Hiller CE, et al. 1000 Norms  
39 Project: Protocol of a cross-sectional study cataloging human variation. *Physiother (United*  
40 *Kingdom).* 2016;102:50–6.  
41  
42  
43  
44  
45  
46  
47  
48  
49  
50  
51  
52  
53  
54  
55  
56  
57  
58  
59  
60



1  
2  
3  
4  
5  
6  
7  
8  
9  
10  
11  
12  
13  
14  
15  
16  
17  
18  
19  
20  
21  
22  
23  
24  
25  
26  
27  
28  
29  
30  
31  
32  
33  
34  
35  
36  
37  
38  
39  
40  
41  
42  
43  
44  
45  
46  
47  
48  
49  
50  
51  
52  
53  
54  
55  
56  
57  
58  
59  
60

**Legend text**

Figure 1

Simple error bars display the relationship between foot posture and age across childhood.

For peer review only

Table 1

Descriptive statistics for the amalgamated data sets. Due to variation between the constituent datasets, main results emerged from the variables of age, BMI, FPI Left. Gender ratio was 1699 males: 1518 females.

| Variable                 | N    | Range | Minimum | Maximum | Mean  | SD   |
|--------------------------|------|-------|---------|---------|-------|------|
| Age (years)              | 3217 | 12    | 3       | 15      | 8.67  | 2.02 |
| BMI (kg/m <sup>2</sup> ) | 3217 | 28.57 | 10.57   | 39.14   | 19.08 | 4.05 |
| FPI Right                | 3217 | 16    | -4      | 12      | 4.20  | 3.00 |
| FPI Left                 | 3217 | 16    | -4      | 12      | 4.11  | 2.92 |

Table 2

The FPI range which refer to foot posture categories. were collated for each year of age. The median FPI total score across the study population was 4(3) points. with the trend of reduced FPI with increased age confirmed.

| Age (yrs)                        | No. /Age | FPI-6 total score – <i>Foot posture category cut-offs</i> |          |         |          |       |                  |         |             |  |
|----------------------------------|----------|-----------------------------------------------------------|----------|---------|----------|-------|------------------|---------|-------------|--|
|                                  |          | < -5                                                      | -1 to -4 | 0 to +5 | +6 to +9 | > +10 | Mean FPI         | SD      | Range       |  |
| 3                                | 21       | 0                                                         | 2        | 4       | 14       | 1     | 6.38             | 3.03    | 11          |  |
| 4                                | 20       | 0                                                         | 1        | 5       | 12       | 2     | 6.7              | 2.60    | 11          |  |
| 5                                | 55       | 0                                                         | 5        | 34      | 13       | 3     | 4.15             | 2.81    | 12          |  |
| 6                                | 388      | 0                                                         | 29       | 213     | 132      | 14    | 4.45             | 2.80    | 15          |  |
| 7                                | 536      | 0                                                         | 51       | 296     | 164      | 25    | 4.3              | 2.93    | 16          |  |
| 8                                | 473      | 0                                                         | 48       | 271     | 131      | 23    | 4.01             | 2.95    | 16          |  |
| 9                                | 625      | 0                                                         | 74       | 362     | 175      | 14    | 3.82             | 2.77    | 16          |  |
| 10                               | 497      | 0                                                         | 62       | 291     | 123      | 21    | 3.69             | 2.86    | 15          |  |
| 11                               | 377      | 0                                                         | 50       | 194     | 119      | 14    | 4.24             | 3.02    | 16          |  |
| 12                               | 144      | 0                                                         | 24       | 65      | 48       | 7     | 4.22             | 3.23    | 14          |  |
| 13                               | 33       | 0                                                         | 1        | 17      | 12       | 3     | 5.18             | 2.98    | 10          |  |
| 14                               | 22       | 0                                                         | 4        | 12      | 6        | 0     | 3.14             | 3.40    | 12          |  |
| 15                               | 26       | 0                                                         | 3        | 12      | 11       | 0     | 4.19             | 3.31    | 12          |  |
| Total                            | 3217     | 0                                                         | 354      | 1776    | 960      | 127   | 4.2              | 3       | 16          |  |
| Mean age (SD)<br>8.67 yrs (2.02) |          |                                                           |          |         |          |       | <u>FPI score</u> |         |             |  |
| % Total<br>(N=3217)              |          | 0                                                         | 11       | 55.2    | 29.84    | 3.95  | Median<br>4      | SD<br>3 | Range<br>16 |  |

Table 3

FPI total scores versus age year groups. The general trend showed FPI scores declining with age, which supports the clinical observation of less flatfoot in older children.

| FPI/<br>Age   | -4  | -3  | -2  | -1  | 0   | 1   | 2    | 3   | 4    | 5   | 6    | 7   | 8   | 9   | 10  | 11  | 12  | Total / n |
|---------------|-----|-----|-----|-----|-----|-----|------|-----|------|-----|------|-----|-----|-----|-----|-----|-----|-----------|
| 3             | 0   | 0   | 0   | 1   | 1   | 0   | 0    | 1   | 2    | 1   | 2    | 0   | 3   | 4   | 4   | 0   | 2   | 21        |
| 4             | 0   | 0   | 0   | 0   | 1   | 0   | 0    | 0   | 3    | 3   | 5    | 2   | 2   | 1   | 1   | 2   | 0   | 20        |
| 5             | 0   | 0   | 1   | 0   | 6   | 3   | 7    | 11  | 7    | 3   | 6    | 2   | 2   | 1   | 1   | 4   | 1   | 55        |
| 6             | 0   | 1   | 3   | 6   | 24  | 31  | 45   | 46  | 47   | 38  | 69   | 30  | 19  | 11  | 6   | 8   | 4   | 388       |
| 7             | 1   | 6   | 4   | 3   | 39  | 43  | 48   | 72  | 69   | 55  | 90   | 33  | 22  | 27  | 14  | 7   | 3   | 536       |
| 8             | 1   | 2   | 1   | 8   | 36  | 47  | 55   | 45  | 49   | 48  | 89   | 27  | 24  | 17  | 13  | 7   | 4   | 473       |
| 9             | 3   | 3   | 5   | 11  | 55  | 61  | 60   | 72  | 81   | 78  | 92   | 48  | 21  | 14  | 9   | 8   | 4   | 625       |
| 10            | 0   | 5   | 3   | 14  | 41  | 59  | 68   | 71  | 54   | 39  | 61   | 23  | 17  | 12  | 17  | 9   | 4   | 497       |
| 11            | 1   | 3   | 4   | 10  | 29  | 22  | 31   | 48  | 58   | 32  | 52   | 29  | 26  | 14  | 10  | 3   | 5   | 377       |
| 12            | 0   | 2   | 2   | 6   | 17  | 9   | 12   | 7   | 19   | 11  | 19   | 14  | 12  | 6   | 5   | 3   | 0   | 144       |
| 13            | 0   | 0   | 0   | 0   | 1   | 2   | 1    | 6   | 2    | 5   | 2    | 7   | 2   | 2   | 3   | 0   | 0   | 33        |
| 14            | 0   | 1   | 2   | 0   | 1   | 3   | 2    | 3   | 4    | 0   | 1    | 2   | 0   | 2   | 1   | 0   | 0   | 22        |
| 15            | 0   | 1   | 2   | 0   | 0   | 1   | 3    | 4   | 3    | 2   | 2    | 3   | 0   | 3   | 2   | 0   | 0   | 26        |
| Total/<br>FPI | 6   | 24  | 27  | 59  | 251 | 281 | 332  | 386 | 398  | 315 | 490  | 220 | 150 | 114 | 86  | 51  | 27  | 3217      |
| %             | 0,2 | 0,7 | 0,8 | 1,8 | 7,8 | 8,7 | 10,3 | 12  | 12,4 | 9,8 | 15,2 | 6,8 | 4,7 | 3,5 | 2,7 | 1,6 | 0,8 | 100       |

#: Percentage, SD: Standard Deviation, R: Range

Table 4

FPI total scores versus age year groups. The general trend showed FPI scores declining with age, which supports the clinical observation of less flatfoot being seen in older children. Clinical alert is indicated for foot posture  $> \pm 2SD$ , representing 5% of expected abnormality.

| Age | -2SD  | -1SD  | Mean        | +1SD  | +2SD  | Sample size | SD  | FPI Median (+/- 1SD) | FPI Median (+/- 2SD) | Clinical Alert FPI $> \pm 2SD$ |
|-----|-------|-------|-------------|-------|-------|-------------|-----|----------------------|----------------------|--------------------------------|
| 3   | 0,02  | 3,60  | <b>7,19</b> | 10,78 | 10,78 | 21          | 3.6 | 8 (4 – 12)           | 8 (0 – 12)           | <b>&lt; 0 or &gt; 12</b>       |
| 4   | 1,11  | 3,76  | <b>6,4</b>  | 9,04  | 9,04  | 20          | 2.6 | 6 (3 – 9)            | 6 (0 – 12)           | <b>&lt; 0 or &gt; 12</b>       |
| 5   | -2,41 | 0,91  | <b>4,22</b> | 7,54  | 7,54  | 55          | 3.3 | 3 (0 – 6)            | 3 (-3 – 9)           | <b>&lt; -3 or &gt; 9</b>       |
| 6   | -1,37 | 1,50  | <b>4,36</b> | 7,22  | 7,22  | 388         | 2.9 | 4 (1 – 7)            | 4 (-2 – 10)          | <b>&lt; -2 or &gt; 10</b>      |
| 7   | -1,53 | 1,40  | <b>4,32</b> | 7,24  | 7,24  | 536         | 2.9 | 4 (1 – 7)            | 4 (-2 – 10)          | <b>&lt; -2 or &gt; 10</b>      |
| 8   | -1,64 | 1,33  | <b>4,29</b> | 7,25  | 7,25  | 473         | 2.9 | 4 (1 – 7)            | 4 (-1 – 10)          | <b>&lt; -1 or &gt; 10</b>      |
| 9   | -1,74 | 1,11  | <b>3,96</b> | 6,81  | 6,81  | 625         | 2.8 | 4 (1 – 7)            | 4 (-1 – 10)          | <b>&lt; -1 or &gt; 10</b>      |
| 10  | -2,31 | 0,73  | <b>3,77</b> | 6,81  | 6,81  | 497         | 3.0 | 3 (0 – 6)            | 4 (-3 – 9)           | <b>&lt; -3 or &gt; 9</b>       |
| 11  | -1,77 | 1,28  | <b>4,33</b> | 7,38  | 7,38  | 377         | 3.0 | 4 (1 – 7)            | 4 (-2 – 10)          | <b>&lt; -2 or &gt; 10</b>      |
| 12  | -2,43 | 0,92  | <b>4,26</b> | 7,61  | 7,61  | 144         | 3.3 | 4 (1 – 7)            | 4 (-2 – 10)          | <b>&lt; -2 or &gt; 10</b>      |
| 13  | -0,03 | 2,71  | <b>5,45</b> | 8,19  | 8,19  | 33          | 2.7 | 5 (2 – 8)            | 5 (-1 – 11)          | <b>&lt; -1 or &gt; 11</b>      |
| 14  | -3,89 | -0,28 | <b>3,32</b> | 6,92  | 6,92  | 22          | 3.6 | 4 (1 – 7)            | 4 (-2 – 9)           | <b>&lt; -2 or &gt; 9</b>       |
| 15  | -2,84 | 0,77  | <b>4,38</b> | 7,99  | 7,99  | 26          | 3.6 | 4 (0 – 8)            | 4 (-4 – 12)          | <b>&lt; -4 or &gt; 12</b>      |

**Table 5**

FPI and BMI category distributions, showing greatest concordance between normal FPI and normal BMI.

|                 |                | Underweight     | Normal            | Overweight or Obese | Total |
|-----------------|----------------|-----------------|-------------------|---------------------|-------|
| Supinated       | Count          | 18 <sup>a</sup> | 260 <sup>a</sup>  | 76 <sup>a</sup>     | 354   |
|                 | Expected count | 15.6            | 264.9             | 73.5                | 354   |
| Normal          | Count          | 68 <sup>a</sup> | 1325 <sup>a</sup> | 383 <sup>a</sup>    | 1776  |
|                 | Expected count | 78.4            | 1328.8            | 368.8               | 1776  |
| Pronated        | Count          | 44 <sup>a</sup> | 728 <sup>a</sup>  | 188 <sup>a</sup>    | 960   |
|                 | Expected count | 42.4            | 718.3             | 199.3               | 960   |
| Highly Pronated | Count          | 12 <sup>a</sup> | 94 <sup>b</sup>   | 21 <sup>b</sup>     | 127   |
|                 | Expected count | 5.6             | 95                | 26.4                | 127   |
| Total           | Count          | 142             | 2407              | 668                 | 3217  |

Note: superscript letters denote a subset of FPI (Left) categories whose column proportions did not differ significantly from each other at the level of 0.05.

1  
2  
3  
4  
5  
6  
7  
8  
9  
10  
11  
12  
13  
14  
15  
16  
17  
18  
19  
20  
21  
22  
23  
24  
25  
26  
27  
28  
29  
30  
31  
32  
33  
34  
35  
36  
37  
38  
39  
40  
41  
42  
43  
44  
45  
46  
47  
48  
49  
50  
51  
52  
53  
54  
55  
56  
57  
58  
59  
60

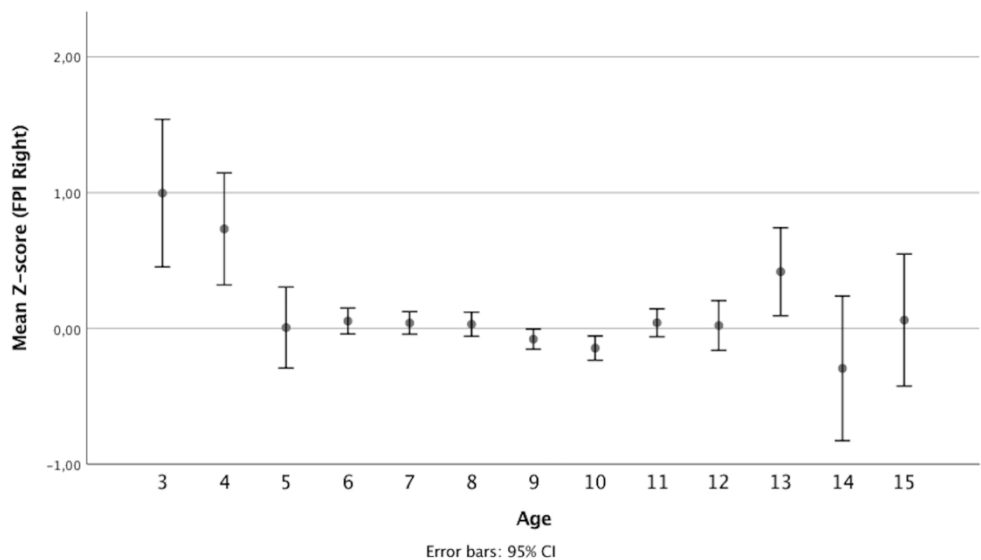

Figure 1 Simple error bars display the relationship between foot posture and age across childhood

89x52mm (600 x 600 DPI)

## STROBE Statement—checklist of items that should be included in reports of observational studies

|                              | Item No | Recommendation                                                                                                                                                                             | Page |
|------------------------------|---------|--------------------------------------------------------------------------------------------------------------------------------------------------------------------------------------------|------|
| <b>Title and abstract</b>    | 1       | (a) Indicate the study's design with a commonly used term in the title or the abstract                                                                                                     | 1-2  |
|                              |         | (b) Provide in the abstract an informative and balanced summary of what was done and what was found                                                                                        |      |
| <b>Introduction</b>          |         |                                                                                                                                                                                            |      |
| Background/rationale         | 2       | Explain the scientific background and rationale for the investigation being reported                                                                                                       | 4    |
| Objectives                   | 3       | State specific objectives, including any prespecified hypotheses                                                                                                                           | 4    |
| <b>Methods</b>               |         |                                                                                                                                                                                            |      |
| Study design                 | 4       | Present key elements of study design early in the paper                                                                                                                                    | 5    |
| Setting                      | 5       | Describe the setting, locations, and relevant dates, including periods of recruitment, exposure, follow-up, and data collection                                                            | 5    |
| Participants                 | 6       | (a) <i>Cohort study</i> —Give the eligibility criteria, and the sources and methods of selection of participants. Describe methods of follow-up                                            | 5    |
|                              |         | <i>Case-control study</i> —Give the eligibility criteria, and the sources and methods of case ascertainment and control selection. Give the rationale for the choice of cases and controls |      |
|                              |         | <i>Cross-sectional study</i> —Give the eligibility criteria, and the sources and methods of selection of participants                                                                      |      |
|                              |         | (b) <i>Cohort study</i> —For matched studies, give matching criteria and number of exposed and unexposed                                                                                   |      |
|                              |         | <i>Case-control study</i> —For matched studies, give matching criteria and the number of controls per case                                                                                 |      |
| Variables                    | 7       | Clearly define all outcomes, exposures, predictors, potential confounders, and effect modifiers. Give diagnostic criteria, if applicable                                                   | 5    |
| Data sources/<br>measurement | 8*      | For each variable of interest, give sources of data and details of methods of assessment (measurement). Describe comparability of assessment methods if there is more than one group       | 5    |
| Bias                         | 9       | Describe any efforts to address potential sources of bias                                                                                                                                  | -    |
| Study size                   | 10      | Explain how the study size was arrived at                                                                                                                                                  | 5    |
| Quantitative variables       | 11      | Explain how quantitative variables were handled in the analyses. If applicable, describe which groupings were chosen and why                                                               | 6    |
| Statistical methods          | 12      | (a) Describe all statistical methods, including those used to control for confounding                                                                                                      | 6    |
|                              |         | (b) Describe any methods used to examine subgroups and interactions                                                                                                                        | 6    |
|                              |         | (c) Explain how missing data were addressed                                                                                                                                                | -    |
|                              |         | (d) <i>Cohort study</i> —If applicable, explain how loss to follow-up was addressed                                                                                                        | 6    |
|                              |         | <i>Case-control study</i> —If applicable, explain how matching of cases and controls was addressed                                                                                         |      |
|                              |         | <i>Cross-sectional study</i> —If applicable, describe analytical methods taking account of sampling strategy                                                                               |      |
|                              |         | (e) Describe any sensitivity analyses                                                                                                                                                      |      |



1  
2  
3  
4  
5  
6  
7  
8  
9  
10  
11  
12  
13  
14  
15  
16  
17  
18  
19  
20  
21  
22  
23  
24  
25  
26  
27  
28  
29  
30  
31  
32  
33  
34  
35  
36  
37  
38  
39  
40  
41  
42  
43  
44  
45  
46  
47  
48  
49  
50  
51  
52  
53  
54  
55  
56  
57  
58  
59  
60**Results**

|                  |     |                                                                                                                                                                                                              |     |
|------------------|-----|--------------------------------------------------------------------------------------------------------------------------------------------------------------------------------------------------------------|-----|
| Participants     | 13* | (a) Report numbers of individuals at each stage of study—eg numbers potentially eligible, examined for eligibility, confirmed eligible, included in the study, completing follow-up, and analysed            | 7   |
|                  |     | (b) Give reasons for non-participation at each stage                                                                                                                                                         | -   |
|                  |     | (c) Consider use of a flow diagram                                                                                                                                                                           | -   |
| Descriptive data | 14* | (a) Give characteristics of study participants (eg demographic, clinical, social) and information on exposures and potential confounders                                                                     | 7-8 |
|                  |     | (b) Indicate number of participants with missing data for each variable of interest                                                                                                                          | -   |
|                  |     | (c) <i>Cohort study</i> —Summarise follow-up time (eg, average and total amount)                                                                                                                             |     |
| Outcome data     | 15* | <i>Cohort study</i> —Report numbers of outcome events or summary measures over time                                                                                                                          |     |
|                  |     | <i>Case-control study</i> —Report numbers in each exposure category, or summary measures of exposure                                                                                                         |     |
|                  |     | <i>Cross-sectional study</i> —Report numbers of outcome events or summary measures                                                                                                                           | 7-8 |
| Main results     | 16  | (a) Give unadjusted estimates and, if applicable, confounder-adjusted estimates and their precision (eg, 95% confidence interval). Make clear which confounders were adjusted for and why they were included | 7-8 |
|                  |     | (b) Report category boundaries when continuous variables were categorized                                                                                                                                    | 7-8 |
|                  |     | (c) If relevant, consider translating estimates of relative risk into absolute risk for a meaningful time period                                                                                             |     |
| Other analyses   | 17  | Report other analyses done—eg analyses of subgroups and interactions, and sensitivity analyses                                                                                                               |     |

**Discussion**

|                  |    |                                                                                                                                                                            |     |
|------------------|----|----------------------------------------------------------------------------------------------------------------------------------------------------------------------------|-----|
| Key results      | 18 | Summarise key results with reference to study objectives                                                                                                                   | 8   |
| Limitations      | 19 | Discuss limitations of the study, taking into account sources of potential bias or imprecision. Discuss both direction and magnitude of any potential bias                 | 8-9 |
| Interpretation   | 20 | Give a cautious overall interpretation of results considering objectives, limitations, multiplicity of analyses, results from similar studies, and other relevant evidence | 8-9 |
| Generalisability | 21 | Discuss the generalisability (external validity) of the study results                                                                                                      | 8-9 |

**Other information**

|         |    |                                                                                                                                                               |   |
|---------|----|---------------------------------------------------------------------------------------------------------------------------------------------------------------|---|
| Funding | 22 | Give the source of funding and the role of the funders for the present study and, if applicable, for the original study on which the present article is based | 1 |
|---------|----|---------------------------------------------------------------------------------------------------------------------------------------------------------------|---|

\*Give information separately for cases and controls in case-control studies and, if applicable, for exposed and unexposed groups in cohort and cross-sectional studies.

**Note:** An Explanation and Elaboration article discusses each checklist item and gives methodological background and published examples of transparent reporting. The STROBE checklist is best used in conjunction with this article (freely available on the Web sites of PLoS Medicine at <http://www.plosmedicine.org/>, Annals of Internal Medicine at <http://www.annals.org/>, and Epidemiology at <http://www.epidem.com/>). Information on the STROBE Initiative is available at [www.strobe-statement.org](http://www.strobe-statement.org).

# BMJ Open

## International normative data for paediatric foot posture assessment: a cross-sectional investigation.

|                                 |                                                                                                                                                                                                                                                                                                                                                                                                            |
|---------------------------------|------------------------------------------------------------------------------------------------------------------------------------------------------------------------------------------------------------------------------------------------------------------------------------------------------------------------------------------------------------------------------------------------------------|
| Journal:                        | <i>BMJ Open</i>                                                                                                                                                                                                                                                                                                                                                                                            |
| Manuscript ID                   | bmjopen-2018-023341.R1                                                                                                                                                                                                                                                                                                                                                                                     |
| Article Type:                   | Research                                                                                                                                                                                                                                                                                                                                                                                                   |
| Date Submitted by the Author:   | 15-Aug-2018                                                                                                                                                                                                                                                                                                                                                                                                |
| Complete List of Authors:       | Gijon-Nogueron, Gabriel; University of Malaga, Nursing and Podiatry<br>Martinez-Nova, Alfonso; Universidad de Extremadura, Nursing and Podiatry<br>Alfageme-Garcia, Pilar; Universidad de Extremadura, Nursing and Podiatry<br>Montes-Alguacil, Jesus; Universidad de Extremadura, Nursing and Podiatry<br>Evans, Angela Margaret; La Trobe University College of Science Health and Engineering, Podiatry |
| <b>Primary Subject Heading</b>: | Paediatrics                                                                                                                                                                                                                                                                                                                                                                                                |
| Secondary Subject Heading:      | Epidemiology, Paediatrics, Rehabilitation medicine                                                                                                                                                                                                                                                                                                                                                         |
| Keywords:                       | foot, posture, children, Paediatric, Foot posture index, Flatfoot                                                                                                                                                                                                                                                                                                                                          |
|                                 |                                                                                                                                                                                                                                                                                                                                                                                                            |

SCHOLARONE™  
Manuscripts

1  
2  
3 **International normative data for paediatric foot posture assessment: a cross-sectional**  
4 **investigation.**  
5

6  
7 [Short title: Children's flatfeet – normal or not?]  
8

9  
10 \*Gabriel Gijon-Nogueron<sup>1</sup>, PhD ([gagijon@uma.es](mailto:gagijon@uma.es))  
11

12 Alfonso Martinez-Nova<sup>2</sup>, PhD ([podoalf@unex.es](mailto:podoalf@unex.es))  
13

14 Pilar Alfageme-Garcia<sup>2</sup>, PhD ([palfagemeg@unex.es](mailto:palfagemeg@unex.es))  
15

16 Jesus Montes-Alguacil<sup>1</sup>, PhD ([jesmonalg@uma.es](mailto:jesmonalg@uma.es))  
17

18 Angela Margaret Evans<sup>3</sup>, PhD ([angela.Evans@latrobe.edu.au](mailto:angela.Evans@latrobe.edu.au))  
19  
20

- 21  
22  
23 1. Department of Nursing and Podiatry, University of Malaga, Spain  
24  
25 2. Department of Nursing, University of Extremadura, Spain  
26  
27 3. Discipline of Podiatry, College of Science, Health and Engineering, La Trobe  
28  
29 University, Bundoora, Melbourne, 3086, Australia  
30  
31

32  
33 First and second author contributed equally in the study/paper.  
34

35  
36 \*Corresponding author: Gabriel Gijon-Nogueron, Department of Nursing and Podiatry,  
37 University of Malaga, Spain. Email: [gagijon@uma.es](mailto:gagijon@uma.es)  
38

39  
40 Word count: 2979; Abstract: 206; References: 42; Tables: 5; Figures 4  
41

42  
43 **Financial support:** No external funding for this manuscript.  
44

45 **Financial Disclosure:** The authors have no financial relationships relevant to this article.  
46

47 **Conflict of Interest:** All authors have indicated no potential conflicts of interest.  
48

49 **Ethical approval:** All procedures performed in studies involving human participants were in  
50 accordance with the ethical standards of the institutional and/or national research committee  
51 and with the 1964 Helsinki declaration and its later amendments or comparable ethical  
52 standards. (Universities of Malaga CEUMA 91/2016H, Extremadura ID 59/2012, University  
53 of Wales Institute, Cardiff and University of South Australia Charles Sturt University Ethics  
54 Committees approval number 10/291 and 89/2012).  
55

1  
2  
3 **Informed consent:** Informed consent was obtained from all individual participants (parents),  
4 whose children were included in the study.  
5

6  
7 **Data sharing statement:** Available data can be obtained by contacting the corresponding  
8 author.  
9

10  
11 **Contributors:** GG-N, AM-N, and AME contributed to the conception of this study. GG-N,  
12 AM-N, and AME did the statistical analysis. Data collectors were collected in Spain JM-A  
13 and PG-A and in Australia AME. GG-N, AM-N, PG-A, JM-A and AME were involved in the  
14 writing and in the review of the manuscript.  
15  
16  
17  
18  
19  
20  
21  
22  
23  
24  
25  
26  
27  
28  
29  
30  
31  
32  
33  
34  
35  
36  
37  
38  
39  
40  
41  
42  
43  
44  
45  
46  
47  
48  
49  
50  
51  
52  
53  
54  
55  
56  
57  
58  
59  
60

## Abstract

**Objectives:** Frequent confusion about paediatric foot posture, and a lack of defined values, results in overdiagnosis of ‘flatfoot’, or pronated foot, and unnecessary treatment. The objective of this study was to establish international reference data for foot posture across childhood, and influence of Body Mass Index (BMI) on paediatric foot posture.

**Design:** Cross-sectional study

**Setting and participants:** The dataset comprised 3217 healthy children, aged from three to 15 years. Contributing data were acquired from Spain, UK, and Australia.

**Interventions:** Foot posture was described by means and z-score of the foot posture index (FPI) and the height and weight of each subject was measured and the body mass index (BMI) was calculated.

**Results:** Pronated (FPI  $\geq +6$ ) were found in 1087 (33.7%) and normal (FPI 0 to +6) in 1776 (55.2%). FPI  $\geq +10$  (highly pronated) was found in 127 children (3.9%). Approximating 20% of children were overweight/obese, but correlation between BMI and FPI was weak and inverse ( $r = -0.066$ ,  $p < 0.01$ ), refuting the relationship between increased body mass and flatfeet.

**Conclusions:** This study confirms that the ‘flat’ or pronated foot is the common foot posture of childhood, with FPI score of +4(3) the average finding. A wide normal range of foot posture across childhood is confirmed.

### Strengths and limitations of this study

- First study to measure foot posture with any method in a sample of 3217 children
- Comparison between different countries strengthens the study findings
- The sample does not balance the number of children from each country
- The disproportionate numbers of children within each age year group

**Key Words:** Foot, Children, Posture, Paediatric, Foot posture index, Flatfoot

## Introduction

Paediatric foot posture is a common parental concern, a frequent presentation to clinicians, and an area of dispute regarding the need for treatment [1]. The term 'flatfoot', has referred to a foot which is nearly or completely contacting the ground [2], and has been evaluated using foot posture [3], footprints [4], radiological and anthropometric measures [5] and is often poorly defined [6]. From a clinical practice perspective, there is no single universally accepted diagnostic technique.

Yet, as Banwell et al indicate in their systematic review [7] about flatfoot and clinical measures, in healthy children, normative data indicates 'flatfoot' is usual at or before eight years of age [8], due to young osseous structures, ligament laxity, increased adipose tissue, and immature neuromuscular control [9, 10]. With variation, flatfoot posture reduces across a child's first ten years [11–13]. Some children with flexible flatfeet experience lower limb pain [[14] with compromised gait [15]. The quandary for clinicians is discerning when a child's foot is within the developmental range, so that parents may be reassured, advised to monitor with growth, or to treat [16, 17]. Foot posture measures needs to be robust to enable valid assessment of children's foot posture and detection of those 'too flat' for normal range limits.

Children's foot posture has been interpreted with footprint assessments in many studies, with inference of a problematic 'flatfoot' when the footprint area is increased. Throughout early childhood, children continue to develop a skeletal medial longitudinal foot arch [18], different from the adult population [19], and altered children's foot posture must be evaluated in context of developmental stage and the presence/absence of systemic influences, such as hypotonia and hypermobility, which may be non-specific or syndromic, eg Down or Marfan's syndromes.

Despite the fact that paediatric flatfoot is a frequent concern [1, 20], the evidence for treatment is weak. The lack of definition for 'flatfoot' has contributed to varying opinions and a lack of consensus for best practice [21–23]. There is no 'gold standard' for categorising foot type, with the margins of flat / rectus / high arch often undefined. Further, few clinical measures are validated in children, hence it is common for clinicians to make diagnostic decisions based on their personal clinical experience of foot types [24]. The availability of normal reference data for paediatric foot posture, based on a valid measure, will provide a

1  
2  
3 'benchmark' for clinical evaluation of this frequent clinical concern. The paediatric flatfoot  
4 proforma (p-FFP) has attempted to standardise diagnoses, and direct when intervention is  
5 required, using a combination of subjective assessment points and a range of foot posture  
6 measures [17]. However, the extent to which the p-FFP is used by clinicians is unknown and  
7 the proforma does not specify management techniques.  
8  
9  
10

11  
12 Ten years ago the Foot Posture Index (FPI-6) [25] emerged with the objective to standardise  
13 the assessment of foot posture in stance across three discrete foot regions (rearfoot, midfoot,  
14 forefoot) enabling feet to be scored and categorised. Both Evans et al [26] and Gijon-  
15 Nogueron et al [27] have previously utilised the FPI to investigate the paediatric foot. The  
16 FPI is a quick, and easy-to-use clinical tool, not requiring equipment. Scrutiny of the FPI  
17 demonstrates it repeatable and valid [3], with excellent inter-rater reliability in assessment of  
18 the paediatric foot[28]. Recently, Banwell indicated the FPI as a preferred method of  
19 paediatric foot posture measurement in future research[7].  
20  
21  
22  
23  
24

## 25 **Methods**

### 26 **Data acquisition**

27  
28 Data was acquired from multiple sources where the FPI had been assessed in different  
29 children, recruited for screening studies, or acting as comparative controls. Three datasets  
30 were acquired from the authors' previous works (n= 1032, n=1457, n = 728) [19, 26, 27].  
31 Measurements were taken during 2010 and 2016, some from 10 schools randomly selected  
32 from 25 schools located in the provinces of Málaga, Granada and Plasencia (Spain) (n=2489).  
33 In the UK (n = 225), and Australia (n = 503), two datasets were acquired from the author's  
34 previous works investigating the reliability of clinical assessment measures (n = 170)[10, 29],  
35 and further datasets were acquired from other authors in the UK investigating foot posture in  
36 young children (n = 225) [30], and Australia investigating (301 subjects) (n = 303)[31], and  
37 the control group from an idiopathic toe-walking study (n = 30)[32]. A total of 3217  
38 observations of the FPI in children aged from three to 15 years were collated.  
39  
40  
41  
42  
43  
44  
45

### 46 **Participants**

47  
48 The inclusion criterion across the studies was for children, of both genders, and aged between  
49 three and 15 years. Exclusion criteria were: foot pain at the time of examination, history of  
50 injury to the lower limbs (eg musculoskeletal injuries during the previous six months),  
51 congenital foot abnormalities, cerebral palsy, motor dysfunction, inflammatory disorders, or  
52 foot surgery. Informed consent had been gained from parents/carers of the children for study  
53 participation. All studies contributing data to the amalgamated dataset were conducted in  
54  
55  
56  
57  
58  
59  
60

1  
2  
3 accordance with the Declaration of Helsinki and was approved by University Human Ethics  
4 Committees in each country (Universities of Malaga CEUMA 91/2016H, Extremadura ID  
5 59/2012, University of Wales Institute, Cardiff and University of South Australia Charles  
6 Sturt University Ethics Committees approval number 10/291 and 89/2012 ).

### 9 **Protocol**

10  
11 Foot posture was assessed with all subjects barefoot, in a relaxed standing position using the  
12 standard protocol for the FPI [33] . The FPI evaluates the multi-segmental nature of foot  
13 posture in all three planes, and does not require the use of specialised equipment. Each item  
14 of the FPI is scored between -2 and +2, with the total six items referring to positions of the  
15 forefoot, midfoot and hindfoot, and the three planes of motion: 1) talar head palpation; 2)  
16 symmetry of supra and infra lateral malleolar curvature; 3) inversion/eversion of the  
17 calcaneus; 4) prominence in the region of the talo-navicular joint; 5) height of the medial  
18 longitudinal arch; 6) abduction/adduction of the forefoot. The FPI score may range from -12  
19 (highly supinated) to +12 (highly pronated). The statistical analysis was independent of the  
20 outcome assessors. The FPI assessors were blinded with the data passed directly to the  
21 database for entry and analyses. Good inter-observer reliability was recorded (ICC 0.852–  
22 0.895) across the studies.

23  
24 The BMI was calculated from the children's height and weight, calculated as,  $BMI =$   
25  $weight(kg)/height(m)^2$ . In Spain, the Orbegozo[34] BMI classification is used; in Australia,  
26 the Australian Health Survey [35]; and in UK the National Child Measurement Programme  
27 [36]. Accordingly, we classified children by their BMI score, using the systems proposed by  
28 Orbegozo, Australian Health Survey, and Public Health England, allocating children to one  
29 of four categories: underweight - percentile less than 3 ( $P < 3$ ), normal weight - percentile  
30 between 3 and 90 ( $P_{3-90}$ ), overweight - percentile between 90 and 97 ( $P_{90-97}$ ) and obesity -  
31 percentile greater than 97 ( $P > 97$ ), based on BMI z-score, and age.

### 32 **Patient involvement**

33  
34 No patients were involved in setting the research question or the outcome measures, nor were  
35 they involved in the design or conduct of the study. No patients were asked to advise on  
36 interpretation or writing up of results. There are no plans to disseminate the results of the  
37 research to study participants.

### 38 **Data analysis**

39  
40 Data were entered and all analyses were performed using constructed data sets in SPSS  
41 version 24 (SPSS Inc, Chicago, Illinois) software packages. The data from the contributing  
42  
43  
44



1  
2  
3 studies were collated in a separate database, with statistical analysis performed by an external  
4 person, previously blind to the results.

5  
6 Testing for normality using a Kolmogorov–Smirnov test, found non-normal distribution of all  
7 data, indicating suitability for non-parametric analysis (Mann–Whitney U and Kruskal–  
8 Wallis). Descriptive statistics (mean, standard deviation, minimum, maximum, frequencies)  
9 were used to examine the basic anthropometrical characteristics of the study populations. The  
10 FPI was analysed as continuous data, rather than as z-score data, and analysis of variance was  
11 conducted to determine the association between the different BMI groups (underweight,  
12 normal, overweight and obesity), gender, age, and the FPI. To preserve the independence of  
13 data[37], and based on the strong correlation between FPI scores for left and right feet [38],  
14 only the left foot (chosen at random) was used in the statistical analyses, applying the Games-  
15 Howell post hoc correction to identify significant differences. With reference to the available  
16 normative data [25], three FPI-6 scores levels were used to ‘define and explore’ the range  
17 supinated (-12 to -1), neutral (0 to +5), pronated (+6 to +8), and overpronated (+9 to +12).  
18 The significance level was set at  $p < 0.05$ , and all the analyses and tests were two-sided  
19  
20  
21  
22  
23  
24  
25  
26

## 27 **Results**

28  
29 The mean age of the study population of 3217 children was 8.67 years (SD 2.02), ranging  
30 from three years to 15 years. The mean BMI was  $19.08 \text{ kg/m}^2$  (SD 4.05), ranging from  $10.57$   
31  $\text{kg/m}^2$  to  $39.14 \text{ kg/m}^2$ . The mean FPI score was 4.11 (SD 2.92) and 4.20 (3.00) for left and  
32 right feet respectively, with whole scores ranging from -4 to +12 (left and right) (Figure 1,  
33 FPI right feet). The total study population gender distribution was 1699 male, 1518 female  
34 (Table 1).  
35  
36  
37  
38  
39

40  
41 In the study population of 3217 children, flatfeet or pronated ( $\text{FPI} \geq +6$ ) were found in 1087  
42 (33.7%) children and normal ( $\text{FPI} < +6$ ) in 1776 (55.2%) children and  $\text{FPI} \geq +10$  yielded  
43 flatfeet in 127 (3.9%) cases. Table 2 used designated FPI categories to define and explore the  
44 range of foot posture across childhood.  
45  
46  
47

48  
49 There was strong correlation between FPI scores on left and right sides ( $r = 0.9014$ ,  $p < 0.01$ ),  
50 from which the left side was arbitrarily used for subsequent analyses. Similarly, we found  
51 little gender bias, with the mean FPI for males 4.2 (2.9), range -4 to +12, and for females,  
52 mean FPI 3.99 (2.9), range -4 to +12 (Figure 2). The correlation between FPI and gender  
53 used z-score was very weak, if significant ( $F=4.073$ ,  $p=0.04$ ). Between countries there was  
54  
55  
56  
57  
58  
59

1  
2  
3 significant difference ( $p < 0.01$ ), with Spanish children's mean FPI = 4.00(2.9), the UK mean  
4 FPI = 4.9(3.3), and the Australian children's mean FPI = 4.7(3.1).  
5  
6

7  
8 The general trend showed FPI scores declining with age, which supports the clinical  
9 observation of less flatfoot in older children. The frequency of FPI scores for each year of age  
10 show that the maximum FPI score = +6, in 15.2% of children (Table 3).  
11

12 Clinical alert is indicated for foot posture  $> \pm 2SD$ , representing 5% of expected  
13 abnormality. Table 4 shows the standard deviation of the mean FPI scores, and enables the  
14 mean FPI and one and two standard deviations above and below to be referenced as normally  
15 expected for each year of age. Figure 3 displays and explores the relationship between foot  
16 posture and age across childhood for the study population, using error bars for average z-  
17 scores (95% confidence intervals).  
18  
19  
20  
21  
22  
23

24 Significant correlation was found between BMI and age ( $r = 0.276$ ,  $p < 0.01$ ). The correlation  
25 between BMI and FPI, whilst also statistically significant, was very weak and also inverse ( $r$   
26 =  $-0.066$ ,  $p < 0.01$ ), refuting the strength of relationship between body mass and foot posture.  
27  
28 BMI cut-points and percentiles were used to define underweight, normal weight, overweight,  
29 and obese. Within the total 3217 children, 142 (4.4%) were underweight, 2407 (74.8%) were  
30 normal weight, 469 (16.1%) were overweight, and 199 (6.2%) were obese (Figure 4).  
31

32 Combining categories, 668 (20.8%) of all children were overweight or obese.  
33  
34  
35  
36

37 The foot posture categories were analysed for distribution across the BMI categories (Table  
38 5). The largest overlap of FPI and BMI categories were: normal weight / normal FPI range,  
39  $n = 1325$  (41.2%); normal weight / pronated foot posture,  $n = 728$  (22.6%); overweight or  
40 obese / normal foot posture,  $n = 383$  (11.9%). Supinated feet across all BMI categories returned  
41  $n = 354$  (11.0%). Exploring the association between the pronated foot and BMI across FPI  
42 ranges showed that 960 (29.8%) children had foot posture that was pronated, FPI  $> 6$ . Of  
43 these, 44 (4.5%) were underweight, 728 (75.8%) were normal weight, 188 were overweight,  
44 or obese (19.5%). Further, 127 children had highly pronated foot posture, FPI  $> 10$ . Of these,  
45 12 (9.4%) were underweight, 94 (74.0%) were normal weight, and 21 (16.5%) were  
46 overweight or obese.  
47  
48  
49  
50  
51  
52  
53  
54  
55  
56  
57  
58  
59  
60

## Discussion

This study is the largest investigation to explore paediatric foot posture using the FPI, paediatric anthropometry using BMI, and to analyse the regularly cited influence of increased body weight as a potentiating factor for flatfeet across childhood. This investigation of paediatric foot posture includes children aged from three to 15 years, superseding previous, smaller or age-limited, studies[26, 27].

This study confirms the pronated foot as the common foot posture of childhood, with mean FPI of +4, and 3-point standard deviation, such that average normal FPI range for children aged three to 15 years was between the FPI range +1 to +7 (mean +/- SD). These findings concur with the recent cross-sectional investigation of 1762 children aged six to 11 years [27]. Similarly to Gijon-Nogueron et al [27], we found that the mean FPI scores reduced with age, in non-linear pattern, and within a wide range. The standard deviation approximated 75% of the FPI mean at every age, confirming the considerable and normal variation in foot posture across childhood.

The greatest number of children across all ages displayed FPI within the 0 to +5 FPI range, ie normal foot posture. Next common were children with pronated feet. The least common FPI categories were either supinated or highly pronated, indicative of the foot types that should arrest the attention of clinicians, as less usual presentations. Flatfoot or pronated foot posture was generally found to decline with age, but mean reduction was non-linear and modest, from +6 at age three years, to +3 at 14 years. Importantly, the normal FPI range of variation was broad: -1 to +11 at age three years, and FPI +3 to +9 at age 14 years.

The relationship between increased BMI and flatfeet is again refuted by the findings of this study which found that only 16.5% of the children with highly pronated feet, were also overweight or obese. Similar results have been found in other recent studies [26] [39], contrasting with many older studies which asserted that heavier, fatter children have flatter feet. Importantly, the previous studies all assessed foot posture using a footprint based method of foot posture assessment [4, 40, 41], a method which may well represent adipose tissue spread with weight bearing, rather than anatomical foot morphology, more directly evaluated using the FPI [25, 26]. Whilst it is concerning to find that 21% of the children in this study were overweight or obese, association with flatfeet is not found.

1  
2  
3 The availability of average FPI whole scores, enables clinicians to inform parents as to what  
4 is 'average' and what is 'normal' at any age, as statistically defined. The availability of FPI  
5 scores within one standard deviation above and below the mean, enables clinicians to confirm  
6 for parents that their child approximates with two-thirds, or 68%, of children for a specific  
7 age. Further, FPI scores within two standard deviations above and below the mean, enable  
8 clinicians to inform parents that their child is within the normal 95% range, approximating  
9 one-quarter, or 27%, of same age children. Such reference data helps appreciation of the  
10 range of 'normal range' for foot posture, similarly to that for the onset of independent  
11 walking (age range of 10 to 16 months, mean age approximating 12 to 13 months)[18].  
12  
13  
14  
15  
16  
17  
18

19 The focus of this investigation has been to better elucidate the normal range of foot posture  
20 across childhood, as is commonly assessed by many clinicians using the FPI. Simultaneously,  
21 the authors aimed to provide clinicians with a robust reference guide of normal values within  
22 statistical bounds. The culmination of this aim is provided as a reference Table (Table 4). The  
23 scale of this investigation renders its findings stronger than those of the 1000 Norms protocol  
24 for most age (year) groups, as the comparative number of participants reveals. The 1000  
25 Norms protocol will include: ages 3 to 9 years, 140 (20 per age year); ages 10 to 19 years,  
26 160 (16 per age year)[42]. By comparison, this study informs for: ages 3 to 9 years, 2796 (20  
27 to 764 per age year); ages 10 to 15 years, 1304 (1 to 634 per age year).  
28  
29  
30  
31  
32  
33  
34

35 Clinicians must move beyond flatfoot posture appearance as an indicator for intervention, and  
36 instead appreciate the range of normal variation, and only respond to more pertinent factors  
37 as outlined by the 3QQ (3 Quick Questions) screening tool (addressing pain presentations,  
38 left versus right limb symmetry, paediatric age range)[20]. Clinicians need to appreciate the  
39 normal range of many developmental features, yet simultaneously be alert to the level at  
40 which clinical concern should be raised. The tabulated reference guide provided from this  
41 study, will be of immediate clinical relevance.  
42  
43  
44  
45  
46  
47

48 The striking finding of this study is not that paediatric flexible flatfoot is largely normal, it is  
49 that the supinated paediatric foot is far more likely to be abnormal, especially at age three and  
50 four years. An FPI of -2 or less, must be considered 'abnormal' until shown otherwise, as it is  
51 outside normal range at any age, and should prompt neurological assessment.  
52  
53  
54  
55  
56  
57  
58  
59  
60

1  
2  
3 Limitations of this investigation include the cross-sectional nature of the design and the  
4 ethnicity of participants (largely Caucasian). Further, the sample does not evenly represent  
5 children from each country, nor each year of age, hence caution is indicated for ages three to  
6 seven years and 14 to 15 years where sampling was least. In addition, consideration that this  
7 study is a collation of smaller discrete studies, and should be consider measurement errors,  
8 although all followed the same protocol [3]. Prospective data avails stronger evidence of foot  
9 posture change over time [10].  
10  
11  
12  
13

### 14 **Conclusions**

15 This is the largest study of paediatric foot posture to date. Importantly, the main finding is to  
16 denounce the paediatric flatfoot as deviant. This study confirms that the 'flat' or pronated  
17 foot is the common foot posture of childhood, with FPI score of +4(3) the average finding. A  
18 wide normal range of foot posture across childhood is confirmed (16 FPI points, ie -2 to  
19 +12).  
20  
21  
22

23 The reference data produced from the findings of this study will assist clinicians in  
24 standardised decision-making.  
25  
26

27 Increased paediatric BMI was not associated with flatter feet, questioning the validity of  
28 footprint-derived measures.  
29  
30  
31  
32  
33  
34  
35  
36  
37  
38  
39  
40  
41  
42  
43  
44  
45  
46  
47  
48  
49  
50  
51  
52  
53  
54  
55  
56  
57  
58  
59  
60

## References

1. Carli A, Saran N, Kruijt J, Alam N, Hamdy R. Physiological referrals for paediatric musculoskeletal complaints: A costly problem that needs to be addressed. *Paediatr Child Heal.* 2012;17.
2. Drefus L, PT DPT, Kedem P, Mangan S, PT DPT, Scher D, et al. Reliability of the Arch Height Index as a Measure of Foot Structure in Children. *Pediatr Phys Ther.* 2017;29:83–8. doi:10.1097/PEP.0000000000000337.
3. Redmond AC, Crosbie J, Ouvrier RA. Development and validation of a novel rating system for scoring standing foot posture: The Foot Posture Index. *Clin Biomech.* 2006;21:89–98.
4. Chen KC, Yeh CJ, Kuo JF, Hsieh CL, Yang SF, Wang CH. Footprint analysis of flatfoot in preschool-aged children. *Eur J Pediatr.* 2011;170:611–7.
5. Chang CH, Chen YC, Yang WT, Ho PC, Hwang AW, Chen CH, et al. Flatfoot diagnosis by a unique bimodal distribution of footprint index in children. *PLoS One.* 2014;9.
6. Nemeth B. The diagnosis and management of common childhood orthopedic disorders. *Curr Probl Pediatr Adolesc Health Care.* 2011;41:2–28. doi:10.1016/j.cppeds.2010.10.004.
7. Banwell HA, Paris ME, Mackintosh S, Williams CM. Paediatric flexible flat foot: How are we measuring it and are we getting it right? A systematic review. *Journal of Foot and Ankle Research.* 2018;11.
8. Uden H, Scharfbillig R, Causby R. The typically developing paediatric foot: How flat should it be? A systematic review. *Journal of Foot and Ankle Research.* 2017;10.
9. Sadeghi-Demneh E, Azadinia F, Jafarian F, Shamsi F, Melvin JMA, Jafarpishe M, et al. Flatfoot and obesity in school-age children: a cross-sectional study. *Clin Obes.* 2016;6:42–50.
10. Evans AM, Rome K, Peet L. The foot posture index, ankle lunge test, Beighton scale and the lower limb assessment score in healthy children: A reliability study. *J Foot Ankle Res.* 2012;5.
11. Martínez-Nova A, Gijón-Noguerón G, Alfageme-García P, Montes-Alguacil J, Evans AM. Foot posture development in children aged 5 to 11 years: A three-year prospective study. *Gait Posture.* 2018;62.
12. Mickle KJ, Steele JR, Munro BJ. Is the foot structure of preschool children moderated by gender? *J Pediatr Orthop.* 2008;28:593–6.
13. Stolzman S, Irby MB, Callahan AB, Skelton JA. Pes planus and paediatric obesity: a systematic review of the literature. *Clinical obesity.* 2015;5:52–9.
14. Kothari A, Dixon PC, Stebbins J, Zavatsky AB, Theologis T. The relationship between quality of life and foot function in children with flexible flatfeet. *Gait Posture.* 2015;41:786–90.
15. Lin CJ, Lai KA, Kuan TS, Chou YL. Correlating factors and clinical significance of flexible flatfoot in preschool children. *J Pediatr Orthop.* 2001;21:378–82.

16. Labovitz JM. The algorithmic approach to pediatric flexible pes planovalgus. *Clin Podiatr Med Surg*. 2006;23:57–76.
17. Evans AM. The flat-footed child -- to treat or not to treat: what is the clinician to do? *J Am Podiatr Med Assoc*. 2008;98:386–93.
18. Evans A. *Pocket Podiatry: Paediatrics*. 2010. doi:10.1016/B978-0-7020-3031-4.00017-1.
19. Gijon-nogueron G, Sanchez-rodriguez R, Lopezosa-reca E, Cervera-marin JA, Martinez-quintana R, Martinez-nova A. Normal Values of the Foot Posture Index in a Young Adult Spanish Population. *J Am Pod Med Assoc*. 2015;105:42–6.
20. Evans AM. Mitigating clinician and community concerns about children’s flatfeet, intoeing gait, knock knees or bow legs. *Journal of Paediatrics and Child Health*. 2017;53:1050–3.
21. Evans AM, Rome K. A cochrane review of the evidence for non-surgical interventions for flexible pediatric flat feet. *European Journal of Physical and Rehabilitation Medicine*. 2011;47:69–89.
22. Rome K, Ashford RL, Evans A. Non-surgical interventions for paediatric pes planus. *Cochrane Database of Systematic Reviews*. 2007.
23. Kane K. Foot orthoses for pediatric flexible flatfoot: evidence and current practices among canadian physical therapists. *Pediatr Phys Ther*. 2015;27:53–9. doi:10.1097/PEP.000000000000106.
24. Harris EJ. The Natural History and Pathophysiology of Flexible Flatfoot. *Clinics in Podiatric Medicine and Surgery*. 2010;27:1–23.
25. Redmond AC, Crane YZ, Menz HB. Normative values for the Foot Posture Index. *J Foot Ankle Res*. 2008;1:6. doi:10.1186/1757-1146-1-6.
26. Evans AM, Karimi L. The relationship between paediatric foot posture and body mass index: do heavier children really have flatter feet? *J Foot Ankle Res*. 2015;8:46. doi:10.1186/s13047-015-0101-x.
27. Gijon-Nogueron G, Montes-Alguacil J, Alfageme-Garcia P, Cervera-Marin JA, Morales-Asencio JM, Martinez-Nova A. Establishing normative foot posture index values for the paediatric population: a cross-sectional study. *J Foot Ankle Res*. 2016;9:24. doi:10.1186/s13047-016-0156-3.
28. Morrison SC, Ferrari J. Inter-rater reliability of the Foot Posture Index (FPI-6) in the assessment of the paediatric foot. *J Foot Ankle Res*. 2009;2.
29. Evans AM. The paediatric flat foot and general anthropometry in 140 Australian school children aged 7 - 10 years. *J Foot Ankle Res*. 2011;4.
30. Targett R, Mathieson I. Evaluation of foot posture development in children between three and eleven years of age using the foot posture index. *J Foot Ankle Res*. 2010;3 Suppl 1:P17. doi:10.1186/1757-1146-3-S1-P17.

- 1  
2  
3 31. Scharfbillig RW, Jones S, Scutter S. Sever's disease-Does it effect quality of life? *Foot*.  
4 2009;19:36–43.  
5  
6 32. Williams CM, Tinley P, Curtin M, Nielsen S. Hand preference in children with an  
7 idiopathic toe walking gait. *Acta Paediatr Int J Paediatr*. 2012;101.  
8  
9 33. Keenan A-M, Redmond AC, Horton M, Conaghan PG, Tennant A. The Foot Posture  
10 Index: Rasch analysis of a novel, foot-specific outcome measure. *Arch Phys Med Rehabil*.  
11 2007;88:88–93.  
12  
13 34. Sobradillo B, Aguirre A, Aresti U, Bilbao C F-RC, Lizárraga A et al. Curvas y tablas de  
14 crecimiento (estudio longitudinal y transversal). Fundación Faustino Orbegozo Eizaguirre.  
15 2004. [http://www.aepap.org/pdf/f\\_orbegozo\\_04.pdf](http://www.aepap.org/pdf/f_orbegozo_04.pdf).  
16  
17 35. Australian Bureau of Statistics. Australian Health Survey: First Results, 2011-12. CAT no  
18 4364055003. 2012;:1–61. doi:ABS cat. no. 4364.0.55.003.  
19  
20 36. National Child Measurement Programme. Changes in children ' s body mass index.  
21 2013;:1–36. [http://www.noo.org.uk/uploads/doc/vid\\_17929\\_NCMP\\_Changes\\_children.pdf](http://www.noo.org.uk/uploads/doc/vid_17929_NCMP_Changes_children.pdf).  
22  
23 37. Redmond AC, Crane YZ, Menz HB. Normative values for the Foot Posture Index. *J Foot*  
24 *Ankle Res*. 2008;1:6. doi:10.1186/1757-1146-1-6.  
25  
26 38. Menz HB. Analysis of paired data in physical therapy research: time to stop double-  
27 dipping? *J Orthop Sports Phys Ther*. 2005;35:477–8.  
28  
29 39. Gijon-Nogueron G, Montes-Alguacil J, Martinez-Nova A, Alfageme-Garcia P, Cervera-  
30 Marin JA, Morales-Asencio JM. Overweight, obesity and foot posture in children: A cross-  
31 sectional study. *Journal of Paediatrics and Child Health*. 2016.  
32  
33 40. Mickle KJ, Steele JR, Munro BJ. The feet of overweight and obese young children: are  
34 they flat or fat? *Obesity (Silver Spring)*. 2006;14:1949–53.  
35  
36 41. Villarroya MA, Esquivel JM, Tomás C, Moreno LA, Buenafé A, Bueno G. Assessment of  
37 the medial longitudinal arch in children and adolescents with obesity: Footprints and  
38 radiographic study. *Eur J Pediatr*. 2009;168.  
39  
40 42. McKay MJ, Baldwin JN, Ferreira P, Simic M, Vanicek N, Hiller CE, et al. 1000 Norms  
41 Project: Protocol of a cross-sectional study cataloging human variation. *Physiother (United*  
42 *Kingdom)*. 2016;102:50–6.  
43  
44  
45  
46  
47  
48  
49  
50  
51  
52  
53  
54  
55  
56  
57  
58  
59  
60



**Legend text**

Figure 1 Frequency plot of FPI values (n=3217)

Figure 2 FPI frequency plot for gender

Figure 3 Simple error bars display the relationship between FPI and age.

Figure 4 Frequency plot of BMI category versus FPI category

For peer review only

Table 1

Descriptive statistics for the amalgamated data sets. Due to variation between the constituent datasets, main results emerged from the variables of age, BMI, FPI Left. Gender ratio was 1699 males: 1518 females.

| Variable                 | N    | Range | Minimum | Maximum | Mean  | SD   |
|--------------------------|------|-------|---------|---------|-------|------|
| Age (years)              | 3217 | 12    | 3       | 15      | 8.67  | 2.02 |
| BMI (kg/m <sup>2</sup> ) | 3217 | 28.57 | 10.57   | 39.14   | 19.08 | 4.05 |
| FPI Right                | 3217 | 16    | -4      | 12      | 4.20  | 3.00 |
| FPI Left                 | 3217 | 16    | -4      | 12      | 4.11  | 2.92 |

1  
2  
3  
4  
5  
6  
7  
8  
9  
10  
11  
12  
13  
14  
15  
16  
17  
18  
19  
20  
21  
22  
23  
24  
25  
26  
27  
28  
29  
30  
31  
32  
33  
34  
35  
36  
37  
38  
39  
40  
41  
42  
43  
44  
45  
46  
47

Table 2

The FPI range which refer to foot posture categories. were collated for each year of age. The median FPI total score across the study population was 4(3) points. with the trend of reduced FPI with increased age confirmed.

| Age (yrs) | No. /Age | FPI-6 total score – <i>Foot posture category cut-offs</i> |             |             |               |          |      |       |
|-----------|----------|-----------------------------------------------------------|-------------|-------------|---------------|----------|------|-------|
|           |          | Supinated                                                 | Normal      | Pronated    | High pronated | Mean FPI | SD   | Range |
| 3         | 21       | 2                                                         | 4           | 14          | 1             | 6.38     | 3.03 | 11    |
| 4         | 20       | 1                                                         | 5           | 12          | 2             | 6.7      | 2.60 | 11    |
| 5         | 55       | 5                                                         | 34          | 13          | 3             | 4.15     | 2.81 | 12    |
| 6         | 388      | 29                                                        | 213         | 132         | 14            | 4.45     | 2.80 | 15    |
| 7         | 536      | 51                                                        | 296         | 164         | 25            | 4.3      | 2.93 | 16    |
| 8         | 473      | 48                                                        | 271         | 131         | 23            | 4.01     | 2.95 | 16    |
| 9         | 625      | 74                                                        | 362         | 175         | 14            | 3.82     | 2.77 | 16    |
| 10        | 497      | 62                                                        | 291         | 123         | 21            | 3.69     | 2.86 | 15    |
| 11        | 377      | 50                                                        | 194         | 119         | 14            | 4.24     | 3.02 | 16    |
| 12        | 144      | 24                                                        | 65          | 48          | 7             | 4.22     | 3.23 | 14    |
| 13        | 33       | 1                                                         | 17          | 12          | 3             | 5.18     | 2.98 | 10    |
| 14        | 22       | 4                                                         | 12          | 6           | 0             | 3.14     | 3.40 | 12    |
| 15        | 26       | 3                                                         | 12          | 11          | 0             | 4.19     | 3.31 | 12    |
| Total     | 3217     | 354(11%)                                                  | 1776(55.2%) | 960(29.84%) | 127(3.95%)    | 4.2      | 3    | 16    |

Table 3

FPI total scores versus age year groups.

| FPI/<br>Age   | -4  | -3  | -2  | -1  | 0   | 1   | 2    | 3   | 4    | 5   | 6    | 7   | 8   | 9   | 10  | 11  | 12  | Total / n |
|---------------|-----|-----|-----|-----|-----|-----|------|-----|------|-----|------|-----|-----|-----|-----|-----|-----|-----------|
| 3             | 0   | 0   | 0   | 1   | 1   | 0   | 0    | 1   | 2    | 1   | 2    | 0   | 3   | 4   | 4   | 0   | 2   | 21        |
| 4             | 0   | 0   | 0   | 0   | 1   | 0   | 0    | 0   | 3    | 3   | 5    | 2   | 2   | 1   | 1   | 2   | 0   | 20        |
| 5             | 0   | 0   | 1   | 0   | 6   | 3   | 7    | 11  | 7    | 3   | 6    | 2   | 2   | 1   | 1   | 4   | 1   | 55        |
| 6             | 0   | 1   | 3   | 6   | 24  | 31  | 45   | 46  | 47   | 38  | 69   | 30  | 19  | 11  | 6   | 8   | 4   | 388       |
| 7             | 1   | 6   | 4   | 3   | 39  | 43  | 48   | 72  | 69   | 55  | 90   | 33  | 22  | 27  | 14  | 7   | 3   | 536       |
| 8             | 1   | 2   | 1   | 8   | 36  | 47  | 55   | 45  | 49   | 48  | 89   | 27  | 24  | 17  | 13  | 7   | 4   | 473       |
| 9             | 3   | 3   | 5   | 11  | 55  | 61  | 60   | 72  | 81   | 78  | 92   | 48  | 21  | 14  | 9   | 8   | 4   | 625       |
| 10            | 0   | 5   | 3   | 14  | 41  | 59  | 68   | 71  | 54   | 39  | 61   | 23  | 17  | 12  | 17  | 9   | 4   | 497       |
| 11            | 1   | 3   | 4   | 10  | 29  | 22  | 31   | 48  | 58   | 32  | 52   | 29  | 26  | 14  | 10  | 3   | 5   | 377       |
| 12            | 0   | 2   | 2   | 6   | 17  | 9   | 12   | 7   | 19   | 11  | 19   | 14  | 12  | 6   | 5   | 3   | 0   | 144       |
| 13            | 0   | 0   | 0   | 0   | 1   | 2   | 1    | 6   | 2    | 5   | 2    | 7   | 2   | 2   | 3   | 0   | 0   | 33        |
| 14            | 0   | 1   | 2   | 0   | 1   | 3   | 2    | 3   | 4    | 0   | 1    | 2   | 0   | 2   | 1   | 0   | 0   | 22        |
| 15            | 0   | 1   | 2   | 0   | 0   | 1   | 3    | 4   | 3    | 2   | 2    | 3   | 0   | 3   | 2   | 0   | 0   | 26        |
| Total/<br>FPI | 6   | 24  | 27  | 59  | 251 | 281 | 332  | 386 | 398  | 315 | 490  | 220 | 150 | 114 | 86  | 51  | 27  | 3217      |
| %             | 0,2 | 0,7 | 0,8 | 1,8 | 7,8 | 8,7 | 10,3 | 12  | 12,4 | 9,8 | 15,2 | 6,8 | 4,7 | 3,5 | 2,7 | 1,6 | 0,8 | 100       |

%. Percentage, SD: Standard Deviation, R: Range

Table 4  
FPI total scores versus age year groups.

| Age | -2SD  | -1SD  | Mean        | +1SD  | +2SD  | Sample size | SD  | FPI Median (+/- 1SD) | FPI Median (+/- 2SD) | Clinical Alert FPI > +/-2SD |
|-----|-------|-------|-------------|-------|-------|-------------|-----|----------------------|----------------------|-----------------------------|
| 3   | 0,02  | 3,60  | <b>7,19</b> | 10,78 | 12,78 | 21          | 3.6 | 8 (4 – 12)           | 8 (0 – 12)           | < <b>0</b> or > <b>12</b>   |
| 4   | 1,11  | 3,76  | <b>6,4</b>  | 9,04  | 11,79 | 20          | 2.6 | 6 (3 – 9)            | 6 (0 – 12)           | < <b>0</b> or > <b>12</b>   |
| 5   | -2,41 | 0,91  | <b>4,22</b> | 7,54  | 10,68 | 55          | 3.3 | 3 (0 – 6)            | 3 (-3 – 9)           | < <b>-3</b> or > <b>9</b>   |
| 6   | -1,37 | 1,50  | <b>4,36</b> | 7,22  | 10,71 | 388         | 2.9 | 4 (1 – 7)            | 4 (-2 – 10)          | < <b>-2</b> or > <b>10</b>  |
| 7   | -1,53 | 1,40  | <b>4,32</b> | 7,24  | 10,67 | 536         | 2.9 | 4 (1 – 7)            | 4 (-2 – 10)          | < <b>-2</b> or > <b>10</b>  |
| 8   | -1,64 | 1,33  | <b>4,29</b> | 7,25  | 10,15 | 473         | 2.9 | 4 (1 – 7)            | 4 (-1 – 10)          | < <b>-1</b> or > <b>10</b>  |
| 9   | -1,74 | 1,11  | <b>3,96</b> | 6,81  | 9,83  | 625         | 2.8 | 4 (1 – 7)            | 4 (-1 – 10)          | < <b>-1</b> or > <b>10</b>  |
| 10  | -2,31 | 0,73  | <b>3,77</b> | 6,81  | 9,92  | 497         | 3.0 | 3 (0 – 6)            | 4 (-3 – 9)           | < <b>-3</b> or > <b>9</b>   |
| 11  | -1,77 | 1,28  | <b>4,33</b> | 7,38  | 10,20 | 377         | 3.0 | 4 (1 – 7)            | 4 (-2 – 10)          | < <b>-2</b> or > <b>10</b>  |
| 12  | -2,43 | 0,92  | <b>4,26</b> | 7,61  | 10,73 | 144         | 3.3 | 4 (1 – 7)            | 4 (-2 – 10)          | < <b>-2</b> or > <b>10</b>  |
| 13  | -0,03 | 2,71  | <b>5,45</b> | 8,19  | 11,18 | 33          | 2.7 | 5 (2 – 8)            | 5 (-1 – 11)          | < <b>-1</b> or > <b>11</b>  |
| 14  | -3,89 | -0,28 | <b>3,32</b> | 6,92  | 9,92  | 22          | 3.6 | 4 (1 – 7)            | 4 (-2 – 9)           | < <b>-2</b> or > <b>9</b>   |
| 15  | -2,84 | 0,77  | <b>4,38</b> | 7,99  | 11,18 | 26          | 3.6 | 4 (0 - 8)            | 4 (-4 - 12)          | < <b>-4</b> or > <b>12</b>  |

**Table 5**

FPI and BMI category distributions, showing greatest concordance between normal FPI and normal BMI.

|                 |                | Underweight     | Normal            | Overweight or Obese | Total |
|-----------------|----------------|-----------------|-------------------|---------------------|-------|
| Supinated       | Count          | 18 <sup>a</sup> | 260 <sup>a</sup>  | 76 <sup>a</sup>     | 354   |
|                 | Expected count | 15.6            | 264.9             | 73.5                | 354   |
| Normal          | Count          | 68 <sup>a</sup> | 1325 <sup>a</sup> | 383 <sup>a</sup>    | 1776  |
|                 | Expected count | 78.4            | 1328.8            | 368.8               | 1776  |
| Pronated        | Count          | 44 <sup>a</sup> | 728 <sup>a</sup>  | 188 <sup>a</sup>    | 960   |
|                 | Expected count | 42.4            | 718.3             | 199.3               | 960   |
| Highly Pronated | Count          | 12 <sup>a</sup> | 94 <sup>b</sup>   | 21 <sup>b</sup>     | 127   |
|                 | Expected count | 5.6             | 95                | 26.4                | 127   |
| Total           | Count          | 142             | 2407              | 668                 | 3217  |

Note: superscript letters denote a subset of FPI (Left) categories whose column proportions did not differ significantly from each other at the level of 0.05.

1  
2  
3  
4  
5  
6  
7  
8  
9  
10  
11  
12  
13  
14  
15  
16  
17  
18  
19  
20  
21  
22  
23  
24  
25  
26  
27  
28  
29  
30  
31  
32  
33  
34  
35  
36  
37  
38  
39  
40  
41  
42  
43  
44  
45  
46  
47  
48  
49  
50  
51  
52  
53  
54  
55  
56  
57  
58  
59  
60

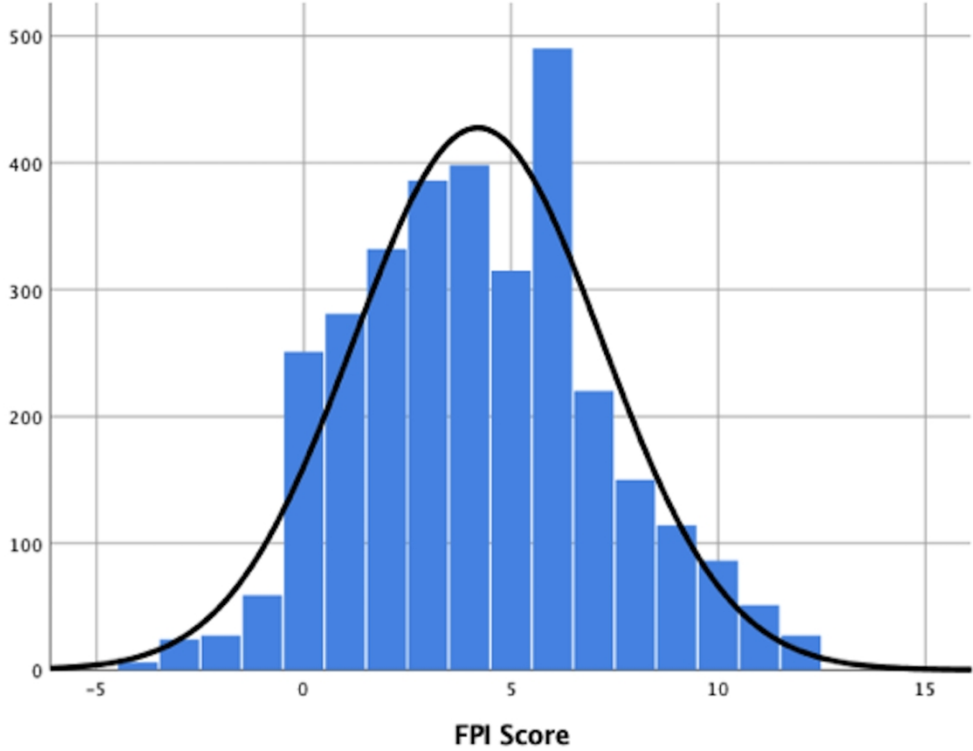

Figure 1 Frequency plot of FPI values (n=3217)  
188x157mm (300 x 300 DPI)

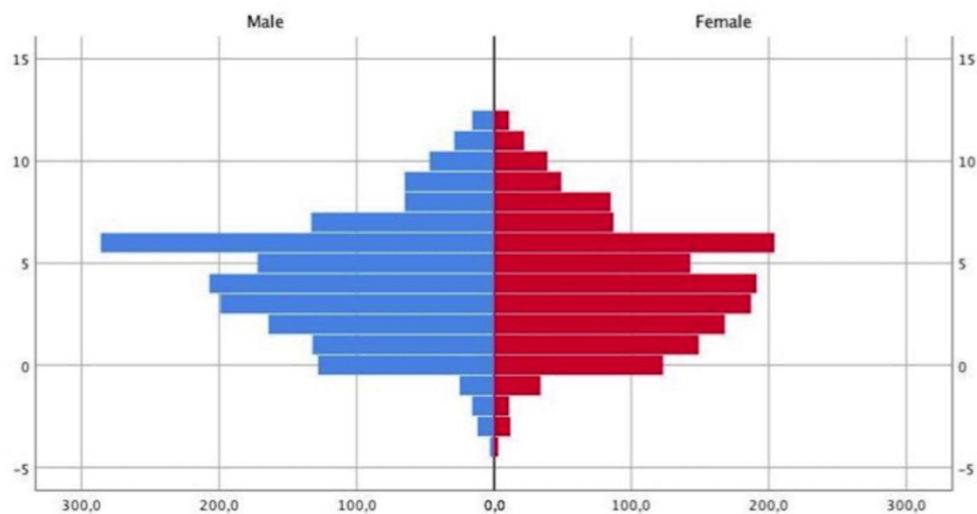

Figure 2 FPI frequency plot for gender

260x151mm (300 x 300 DPI)



1  
2  
3  
4  
5  
6  
7  
8  
9  
10  
11  
12  
13  
14  
15  
16  
17  
18  
19  
20  
21  
22  
23  
24  
25  
26  
27  
28  
29  
30  
31  
32  
33  
34  
35  
36  
37  
38  
39  
40  
41  
42  
43  
44  
45  
46  
47  
48  
49  
50  
51  
52  
53  
54  
55  
56  
57  
58  
59  
60

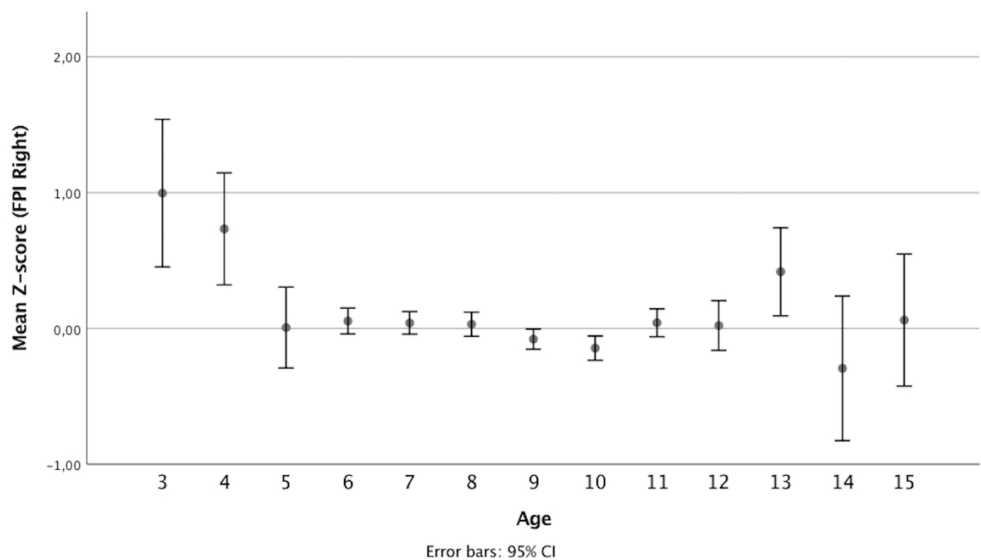

Figure 3 Simple error bars display the relationship between FPI and age.

99x58mm (300 x 300 DPI)

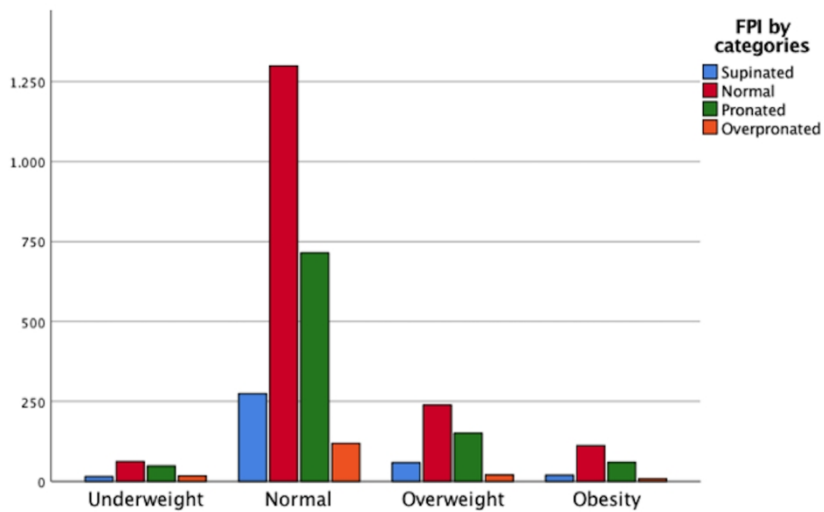

Figure 4 Frequency plot of BMI category versus FPI category

89x67mm (600 x 600 DPI)

## STROBE Statement—checklist of items that should be included in reports of observational studies

|                              | Item No | Recommendation                                                                                                                                                                             | Page |
|------------------------------|---------|--------------------------------------------------------------------------------------------------------------------------------------------------------------------------------------------|------|
| <b>Title and abstract</b>    | 1       | (a) Indicate the study's design with a commonly used term in the title or the abstract                                                                                                     | 1-2  |
|                              |         | (b) Provide in the abstract an informative and balanced summary of what was done and what was found                                                                                        |      |
| <b>Introduction</b>          |         |                                                                                                                                                                                            |      |
| Background/rationale         | 2       | Explain the scientific background and rationale for the investigation being reported                                                                                                       | 4    |
| Objectives                   | 3       | State specific objectives, including any prespecified hypotheses                                                                                                                           | 4    |
| <b>Methods</b>               |         |                                                                                                                                                                                            |      |
| Study design                 | 4       | Present key elements of study design early in the paper                                                                                                                                    | 5    |
| Setting                      | 5       | Describe the setting, locations, and relevant dates, including periods of recruitment, exposure, follow-up, and data collection                                                            | 5    |
| Participants                 | 6       | (a) <i>Cohort study</i> —Give the eligibility criteria, and the sources and methods of selection of participants. Describe methods of follow-up                                            | 5    |
|                              |         | <i>Case-control study</i> —Give the eligibility criteria, and the sources and methods of case ascertainment and control selection. Give the rationale for the choice of cases and controls |      |
|                              |         | <i>Cross-sectional study</i> —Give the eligibility criteria, and the sources and methods of selection of participants                                                                      |      |
|                              |         | (b) <i>Cohort study</i> —For matched studies, give matching criteria and number of exposed and unexposed                                                                                   |      |
|                              |         | <i>Case-control study</i> —For matched studies, give matching criteria and the number of controls per case                                                                                 |      |
| Variables                    | 7       | Clearly define all outcomes, exposures, predictors, potential confounders, and effect modifiers. Give diagnostic criteria, if applicable                                                   | 5    |
| Data sources/<br>measurement | 8*      | For each variable of interest, give sources of data and details of methods of assessment (measurement). Describe comparability of assessment methods if there is more than one group       | 5    |
| Bias                         | 9       | Describe any efforts to address potential sources of bias                                                                                                                                  | -    |
| Study size                   | 10      | Explain how the study size was arrived at                                                                                                                                                  | 5    |
| Quantitative variables       | 11      | Explain how quantitative variables were handled in the analyses. If applicable, describe which groupings were chosen and why                                                               | 6    |
| Statistical methods          | 12      | (a) Describe all statistical methods, including those used to control for confounding                                                                                                      | 6    |
|                              |         | (b) Describe any methods used to examine subgroups and interactions                                                                                                                        | 6    |
|                              |         | (c) Explain how missing data were addressed                                                                                                                                                | -    |
|                              |         | (d) <i>Cohort study</i> —If applicable, explain how loss to follow-up was addressed                                                                                                        | 6    |
|                              |         | <i>Case-control study</i> —If applicable, explain how matching of cases and controls was addressed                                                                                         |      |
|                              |         | <i>Cross-sectional study</i> —If applicable, describe analytical methods taking account of sampling strategy                                                                               |      |
|                              |         | (e) Describe any sensitivity analyses                                                                                                                                                      |      |

**Results**

|                  |     |                                                                                                                                                                                                              |     |
|------------------|-----|--------------------------------------------------------------------------------------------------------------------------------------------------------------------------------------------------------------|-----|
| Participants     | 13* | (a) Report numbers of individuals at each stage of study—eg numbers potentially eligible, examined for eligibility, confirmed eligible, included in the study, completing follow-up, and analysed            | 7   |
|                  |     | (b) Give reasons for non-participation at each stage                                                                                                                                                         | -   |
|                  |     | (c) Consider use of a flow diagram                                                                                                                                                                           | -   |
| Descriptive data | 14* | (a) Give characteristics of study participants (eg demographic, clinical, social) and information on exposures and potential confounders                                                                     | 7-8 |
|                  |     | (b) Indicate number of participants with missing data for each variable of interest                                                                                                                          | -   |
|                  |     | (c) <i>Cohort study</i> —Summarise follow-up time (eg, average and total amount)                                                                                                                             |     |
| Outcome data     | 15* | <i>Cohort study</i> —Report numbers of outcome events or summary measures over time                                                                                                                          |     |
|                  |     | <i>Case-control study</i> —Report numbers in each exposure category, or summary measures of exposure                                                                                                         |     |
|                  |     | <i>Cross-sectional study</i> —Report numbers of outcome events or summary measures                                                                                                                           | 7-8 |
| Main results     | 16  | (a) Give unadjusted estimates and, if applicable, confounder-adjusted estimates and their precision (eg, 95% confidence interval). Make clear which confounders were adjusted for and why they were included | 7-8 |
|                  |     | (b) Report category boundaries when continuous variables were categorized                                                                                                                                    | 7-8 |
|                  |     | (c) If relevant, consider translating estimates of relative risk into absolute risk for a meaningful time period                                                                                             |     |
| Other analyses   | 17  | Report other analyses done—eg analyses of subgroups and interactions, and sensitivity analyses                                                                                                               |     |

**Discussion**

|                  |    |                                                                                                                                                                            |     |
|------------------|----|----------------------------------------------------------------------------------------------------------------------------------------------------------------------------|-----|
| Key results      | 18 | Summarise key results with reference to study objectives                                                                                                                   | 8   |
| Limitations      | 19 | Discuss limitations of the study, taking into account sources of potential bias or imprecision. Discuss both direction and magnitude of any potential bias                 | 8-9 |
| Interpretation   | 20 | Give a cautious overall interpretation of results considering objectives, limitations, multiplicity of analyses, results from similar studies, and other relevant evidence | 8-9 |
| Generalisability | 21 | Discuss the generalisability (external validity) of the study results                                                                                                      | 8-9 |

**Other information**

|         |    |                                                                                                                                                               |   |
|---------|----|---------------------------------------------------------------------------------------------------------------------------------------------------------------|---|
| Funding | 22 | Give the source of funding and the role of the funders for the present study and, if applicable, for the original study on which the present article is based | 1 |
|---------|----|---------------------------------------------------------------------------------------------------------------------------------------------------------------|---|

\*Give information separately for cases and controls in case-control studies and, if applicable, for exposed and unexposed groups in cohort and cross-sectional studies.

**Note:** An Explanation and Elaboration article discusses each checklist item and gives methodological background and published examples of transparent reporting. The STROBE checklist is best used in conjunction with this article (freely available on the Web sites of PLoS Medicine at <http://www.plosmedicine.org/>, Annals of Internal Medicine at <http://www.annals.org/>, and Epidemiology at <http://www.epidem.com/>). Information on the STROBE Initiative is available at [www.strobe-statement.org](http://www.strobe-statement.org).

# BMJ Open

## International normative data for paediatric foot posture assessment: a cross-sectional investigation.

|                                 |                                                                                                                                                                                                                                                                                                                                                                                                            |
|---------------------------------|------------------------------------------------------------------------------------------------------------------------------------------------------------------------------------------------------------------------------------------------------------------------------------------------------------------------------------------------------------------------------------------------------------|
| Journal:                        | <i>BMJ Open</i>                                                                                                                                                                                                                                                                                                                                                                                            |
| Manuscript ID                   | bmjopen-2018-023341.R2                                                                                                                                                                                                                                                                                                                                                                                     |
| Article Type:                   | Research                                                                                                                                                                                                                                                                                                                                                                                                   |
| Date Submitted by the Author:   | 30-Jan-2019                                                                                                                                                                                                                                                                                                                                                                                                |
| Complete List of Authors:       | Gijon-Nogueron, Gabriel; University of Malaga, Nursing and Podiatry<br>Martinez-Nova, Alfonso; Universidad de Extremadura, Nursing and Podiatry<br>Alfageme-Garcia, Pilar; Universidad de Extremadura, Nursing and Podiatry<br>Montes-Alguacil, Jesus; Universidad de Extremadura, Nursing and Podiatry<br>Evans, Angela Margaret; La Trobe University College of Science Health and Engineering, Podiatry |
| <b>Primary Subject Heading</b>: | Paediatrics                                                                                                                                                                                                                                                                                                                                                                                                |
| Secondary Subject Heading:      | Epidemiology, Paediatrics, Rehabilitation medicine                                                                                                                                                                                                                                                                                                                                                         |
| Keywords:                       | Foot, Posture, Children, Paediatric, Flatfoot                                                                                                                                                                                                                                                                                                                                                              |
|                                 |                                                                                                                                                                                                                                                                                                                                                                                                            |

SCHOLARONE™  
Manuscripts

1  
2  
3 **International normative data for paediatric foot posture assessment: a cross-sectional**  
4 **investigation.**  
5  
6

7  
8 [Short title: Children's flatfeet – normal or not?]  
9

10  
11 \*Gabriel Gijon-Nogueron<sup>1</sup>, PhD ([gagijon@uma.es](mailto:gagijon@uma.es))  
12

13  
14 Alfonso Martinez-Nova<sup>2</sup>, PhD ([podoalf@unex.es](mailto:podoalf@unex.es))  
15

16  
17 Pilar Alfageme-Garcia<sup>2</sup>, PhD ([palfagemeg@unex.es](mailto:palfagemeg@unex.es))  
18

19  
20 Jesus Montes-Alguacil<sup>1</sup>, PhD ([jesmonalg@uma.es](mailto:jesmonalg@uma.es))  
21

22  
23 Angela Margaret Evans<sup>3</sup>, PhD ([angela.Evans@latrobe.edu.au](mailto:angela.Evans@latrobe.edu.au))  
24

- 25  
26 1. Department of Nursing and Podiatry, University of Malaga, Spain  
27  
28 2. Department of Nursing, University of Extremadura, Spain  
29  
30 3. Discipline of Podiatry, College of Science, Health and Engineering, La Trobe  
31  
32 University, Bundoora, Melbourne, 3086, Australia  
33

34  
35  
36 First and second author contributed equally in the study/paper.  
37

38  
39 \*Corresponding author: Gabriel Gijon-Nogueron, Department of Nursing and Podiatry,  
40  
41 University of Malaga, Spain. Email: [gagijon@uma.es](mailto:gagijon@uma.es)  
42

43  
44 Word count: 2979; Abstract: 206; References: 42; Tables: 5; Figures 4  
45

46  
47 **Financial support:** No external funding for this manuscript.  
48

49  
50 **Financial Disclosure:** The authors have no financial relationships relevant to this article.  
51

52  
53 **Conflict of Interest:** All authors have indicated no potential conflicts of interest.  
54

55  
56 **Ethical approval:** All procedures performed in studies involving human participants were in  
57  
58 accordance with the ethical standards of the institutional and/or national research committee  
59  
60 and with the 1964 Helsinki declaration and its later amendments or comparable ethical  
standards. (Universities of Malaga CEUMA 91/2016H, Extremadura ID 59/2012, University  
of Wales Institute, Cardiff and University of South Australia Charles Sturt University Ethics  
Committees approval number 10/291 and 89/2012).

1  
2  
3 **Informed consent:** Informed consent was obtained from all individual participants (parents),  
4  
5 whose children were included in the study.  
6

7  
8 **Data sharing statement:** Available data can be obtained by contacting the corresponding  
9  
10 author.  
11

12 **Contributors:** GG-N, AM-N, and AME contributed to the conception of this study. GG-N,  
13  
14 AM-N, and AME did the statistical analysis. Data collectors were collected in Spain JM-A  
15  
16 and PG-A and in Australia AME. GG-N, AM-N, PG-A, JM-A and AME were involved in the  
17  
18 writing and in the review of the manuscript.

19 **Acknowledgements** The authors would like to express their gratitude to the University of  
20  
21 Malaga for their support through the predoctoral grant obtained by JM-C.  
22  
23  
24  
25  
26  
27  
28  
29  
30  
31  
32  
33  
34  
35  
36  
37  
38  
39  
40  
41  
42  
43  
44  
45  
46  
47  
48  
49  
50  
51  
52  
53  
54  
55  
56  
57  
58  
59  
60

## Abstract

**Objectives:** Frequent confusion about paediatric foot posture, and a lack of defined values, results in overdiagnosis of ‘flatfoot’, or pronated foot, and unnecessary treatment. The objective of this study was to establish international reference data for foot posture across childhood, and influence of Body Mass Index (BMI) on paediatric foot posture.

**Design:** Cross-sectional study

**Setting and participants:** The dataset comprised 3217 healthy children, aged from three to 15 years. Contributing data were acquired from Spain, UK, and Australia.

**Interventions:** Foot posture was described by means and z-score of the foot posture index (FPI) and the height and weight of each subject was measured and the body mass index (BMI) was calculated.

**Results:** Pronated (FPI  $\geq +6$ ) were found in 1087 (33.7%) and normal (FPI 0 to +6) in 1776 (55.2%). FPI  $\geq +10$  (highly pronated) was found in 127 children (3.9%). Approximating 20% of children were overweight/obese, but correlation between BMI and FPI was weak and inverse ( $r = -0.066$ ,  $p < 0.01$ ), refuting the relationship between increased body mass and flatfeet.

**Conclusions:** This study confirms that the ‘flat’ or pronated foot is the common foot posture of childhood, with FPI score of +4(3) the average finding. **Trend indicated a less ‘flat’ foot with age, although non-linear.** A wide normal range of foot posture across childhood is confirmed.

### Strengths and limitations of this study

- First study to measure foot posture with any method in a sample of 3217 children
- Comparison between different countries strengthens the study findings
- The sample does not balance the number of children from each country
- The disproportionate numbers of children within each age year group

**Key Words:** Foot, Children, Posture, Paediatric, Foot posture index, Flatfoot



## Introduction

Paediatric foot posture is a common parental concern, a frequent presentation to clinicians, and an area of dispute regarding **both** the need for treatment, **and unnecessary treatment** [1] [2]. The term ‘flatfoot’, has referred to a foot which is nearly or completely contacting the ground [3], and has been evaluated using foot posture [4], footprints [5], radiological and anthropometric measures [6] and is often poorly defined [7]. From a clinical practice perspective, there is no single universally accepted diagnostic technique.

A systematic review [8] **has addressed** flatfoot and clinical measures, in healthy children, **finding ‘flatfoot’ the expected foot posture before** eight years of age, due to young osseous structures, ligament laxity, increased adipose tissue, and immature neuromuscular control [9,10]. With variation, flatfoot posture reduces across a child’s first ten years [11–13]. Some children with flexible flatfeet experience lower limb pain [14] with compromised gait [15]. The quandary for clinicians is discerning when a child’s foot is within the developmental range, so that parents may be reassured, advised to monitor with growth, or to treat [16,17].

Children’s foot posture has been interpreted with footprint assessments in many studies, with inference of a problematic ‘flatfoot’ when the footprint area is increased. Throughout early childhood, children continue to develop a skeletal medial longitudinal foot arch [18], different from the adult population [19], and altered children’s foot posture must be evaluated in context of developmental stage and the presence/absence of systemic influences, such as hypotonia and hypermobility, which may be non-specific or syndromic, eg Down or Marfan’s syndromes.

Despite the fact that paediatric flatfoot is a frequent concern [1,20], the evidence for treatment is weak. The lack of definition for ‘flatfoot’ has contributed to varying opinions and a lack of consensus for best practice [21–23]. There is no ‘gold standard’ for categorising foot type, with the margins of flat / rectus / high arch often undefined. Further, few clinical measures are validated in children, hence it is common for clinicians to make diagnostic decisions based on their personal clinical experience of foot types [24]. The availability of normal reference data for paediatric foot posture, based on a valid measure, will provide a ‘benchmark’ for clinical evaluation of this frequent clinical concern. The paediatric flatfoot proforma (p-FFP) has attempted to standardise diagnoses, and direct when intervention is required, using a combination of subjective assessment points and a range of foot posture

measures [17]. However, the extent to which the p-FFP is used by clinicians is unknown and the proforma does not specify management techniques.

Ten years ago the Foot Posture Index (FPI-6) [25] emerged with the objective to standardise the assessment of foot posture in stance across three discrete foot regions (rearfoot, midfoot, forefoot) enabling feet to be scored and categorised. Both Evans et al [26] and Gijon-Nogueron et al [27] have previously utilised the FPI to investigate the paediatric foot. The FPI is a quick, and easy-to-use clinical tool, not requiring equipment. Scrutiny of the FPI demonstrates it repeatable and valid [4], with excellent inter-rater reliability in assessment of the paediatric foot[28]. Recently, the FPI **has been identified** as a preferred method of paediatric foot posture measurement in future research[29].

## Methods

### Data acquisition

Data was acquired from multiple sources where the FPI had been assessed in different children, recruited for screening studies, or acting as comparative controls. Three datasets were acquired from the authors' previous works (n= 1032, n=1457, n = 728) [19,26,27]. Measurements were taken during 2010 and 2016, some from 10 schools randomly selected from 25 schools located in the provinces of Málaga, Granada and Plasencia (Spain) (n=2489). In the UK (n = 225), and Australia (n = 503), two datasets were acquired from the author's previous works investigating the reliability of clinical assessment measures (n = 170)[10,30], and further datasets were acquired from other authors in the UK investigating foot posture in young children (n = 225) [31], and Australia investigating (301 subjects) (n = 303)[32], and the control group from an idiopathic toe-walking study (n = 30)[33]. A total of 3217 observations of the FPI in children aged from three to 15 years were collated.

### Participants

The inclusion criterion across the studies was for children, of both genders, and aged between three and 15 years. Exclusion criteria were: foot pain at the time of examination, history of injury to the lower limbs (eg musculoskeletal injuries during the previous six months), congenital foot abnormalities, cerebral palsy, motor dysfunction, inflammatory disorders, or foot surgery. Informed consent had been gained from parents/carers of the children for study participation. All studies contributing data to the amalgamated dataset were conducted in accordance with the Declaration of Helsinki and was approved by University Human Ethics Committees in each country (Universities of Malaga CEUMA 91/2016H, Extremadura ID

1  
2  
3 59/2012, University of Wales Institute, Cardiff and University of South Australia Charles  
4 Sturt University Ethics Committees approval number 10/291 and 89/2012 ).

### 6 **Protocol**

7  
8 Foot posture was assessed with all subjects barefoot, in a relaxed standing position using the  
9 standard protocol for the FPI [34] . The FPI evaluates the multi-segmental nature of foot  
10 posture in all three planes, and does not require the use of specialised equipment. Each item  
11 of the FPI is scored between -2 and +2, with the total six items referring to positions of the  
12 forefoot, midfoot and hindfoot, and the three planes of motion: 1) talar head palpation; 2)  
13 symmetry of supra and infra lateral malleolar curvature; 3) inversion/eversion of the  
14 calcaneus; 4) prominence in the region of the talo-navicular joint; 5) height of the medial  
15 longitudinal arch; 6) abduction/adduction of the forefoot. The FPI score may range from -12  
16 (highly supinated) to +12 (highly pronated). The statistical analysis was independent of the  
17 outcome assessors. The FPI assessors were blinded with the data passed directly to the  
18 database for entry and analyses. Good inter-observer reliability was recorded (ICC 0.852–  
19 0.895) across the studies.

20  
21 The BMI was calculated from the children's height and weight, calculated as,  $BMI =$   
22  $weight(kg)/height(m)^2$ . In Spain, the Orbegozo[35] BMI classification is used; in Australia,  
23 the Australian Health Survey [36]; and in UK the National Child Measurement Programme  
24 [37]. Accordingly, we classified children by their BMI score, using the systems proposed by  
25 Orbegozo, Australian Health Survey, and Public Health England, allocating children to one  
26 of four categories: underweight - percentile less than 3 ( $P<3$ ), normal weight - percentile  
27 between 3 and 90 ( $P3-90$ ), overweight - percentile between 90 and 97 ( $P90-97$ ) and obesity -  
28 percentile greater than 97 ( $P>97$ ), based on BMI z-score, and age.

### 29 **Patient involvement**

30  
31 No patients were involved in setting the research question or the outcome measures, nor were  
32 they involved in the design or conduct of the study. No patients were asked to advise on  
33 interpretation or writing up of results. There are no plans to disseminate the results of the  
34 research to study participants.

### 35 **Data analysis**

36  
37 Data were entered and all analyses were performed using constructed data sets in SPSS  
38 version 24 (SPSS Inc, Chicago, Illinois) software packages. The data from the contributing  
39 studies were collated in a separate database, with statistical analysis performed by an external  
40 person, previously blind to the results.

41  
42 Testing for normality using a Kolmogorov–Smirnov test, found non-normal distribution of all  
43  
44  
45  
46  
47  
48  
49  
50  
51  
52  
53  
54  
55  
56  
57  
58  
59  
60

1  
2  
3 data, indicating suitability for non-parametric analysis (Mann–Whitney U and Kruskal–  
4 Wallis). Descriptive statistics (mean, standard deviation, minimum, maximum, frequencies)  
5 were used to examine the basic anthropometrical characteristics of the study populations. The  
6 FPI was analysed as continuous data, rather than as z-score data, and analysis of variance was  
7 conducted to determine the association between the different BMI groups (underweight,  
8 normal, overweight and obesity), gender, age, and the FPI. To preserve the independence of  
9 data[38], and based on the strong correlation between FPI scores for left and right feet [39],  
10 only the left foot (chosen at random) was used in the statistical analyses, applying the Games-  
11 Howell post hoc correction to identify significant differences. With reference to the available  
12 normative data [25], three FPI-6 scores levels were used to ‘define and explore’ the range  
13 supinated (-12 to -1), neutral (0 to +5), pronated (+6 to +8), and overpronated (+9 to +12).  
14 The significance level was set at  $p < 0.05$ , and all the analyses and tests were two-sided  
15  
16  
17  
18  
19  
20  
21  
22  
23  
24  
25

## 26 **Results**

27 The mean age of the study population of 3217 children was 8.67 years (SD 2.02), ranging  
28 from three years to 15 years. The mean BMI was 19.08 kg/m<sup>2</sup> (SD 4.05), ranging from 10.57  
29 kg/m<sup>2</sup> to 39.14 kg/m<sup>2</sup>. The mean FPI score was 4.11 (SD 2.92) and 4.20 (3.00) for left and  
30 right feet respectively, with whole scores ranging from -4 to +12 (left and right) (Figure 1,  
31 FPI right feet). The total study population gender distribution was 1699 male, 1518 female  
32 (Table 1).  
33  
34  
35  
36  
37  
38  
39

40 In the study population of 3217 children, flatfeet or pronated (FPI  $\geq +6$ ) were found in 1087  
41 (33.7%) children and normal (FPI  $< +6$ ) in 1776 (55.2%) children and FPI  $\geq +10$  yielded  
42 flatfeet in 127 (3.9%) cases. Table 2 used designated FPI categories to define and explore the  
43 range of foot posture across childhood.  
44  
45  
46  
47

48 There was strong correlation between FPI scores on left and right sides ( $r = 0.9014$ ,  $p < 0.01$ ),  
49 from which the left side was arbitrarily used for subsequent analyses. Similarly, we found  
50 little gender bias, with the mean FPI for males 4.2 (2.9), range -4 to +12, and for females,  
51 mean FPI 3.99 (2.9), range -4 to +12 (Figure 2). The correlation between FPI and gender  
52 used z-score was very weak, if significant ( $F=4.073$ ,  $p=0.04$ ). Between countries there was  
53 significant difference ( $p < 0.01$ ), with Spanish children’s mean FPI = 4.00(2.9), the UK mean  
54 FPI = 4.9(3.3), and the Australian children’s mean FPI = 4.7(3.1).  
55  
56  
57  
58  
59  
60

1  
2  
3  
4  
5 The general trend showed FPI scores declining with age, which supports the clinical  
6 observation of less flatfoot in older children. The frequency of FPI scores for each year of age  
7 show that the maximum FPI score = +6, in 15.2% of children (Table 3).

8  
9  
10 Clinical alert is indicated for foot posture  $> \pm 2SD$ , representing 5% of expected  
11 abnormality. Table 4 shows the standard deviation of the mean FPI scores, and enables the  
12 mean FPI and one and two standard deviations above and below to be referenced as normally  
13 expected for each year of age. Figure 3 displays and explores the relationship between foot  
14 posture and age across childhood for the study population, using error bars for average z-  
15 scores (95% confidence intervals).  
16  
17  
18  
19  
20  
21

22 Significant correlation was found between BMI and age ( $r = 0.276$ ,  $p < 0.01$ ). The correlation  
23 between BMI and FPI, whilst also statistically significant, was very weak and also inverse ( $r$   
24  $= -0.066$ ,  $p < 0.01$ ), refuting the strength of relationship between body mass and foot posture.  
25 BMI cut-points and percentiles were used to define underweight, normal weight, overweight,  
26 and obese. Within the total 3217 children, 142 (4.4%) were underweight, 2407 (74.8%) were  
27 normal weight, 469 (16.1%) were overweight, and 199 (6.2%) were obese (Figure 4).  
28  
29 Combining categories, 668 (20.8%) of all children were overweight or obese.  
30  
31  
32  
33  
34  
35

36 The foot posture categories were analysed for distribution across the BMI categories (Table  
37 5). The largest overlap of FPI and BMI categories were: normal weight / normal FPI range,  
38  $n = 1325$  (41.2%); normal weight / pronated foot posture,  $n = 728$  (22.6%); overweight or  
39 obese / normal foot posture,  $n = 383$  (11.9%). Supinated feet across all BMI categories returned  
40  $n = 354$  (11.0%). Exploring the association between the pronated foot and BMI across FPI  
41 ranges showed that 960 (29.8%) children had foot posture that was pronated,  $FPI > 6$ . Of  
42 these, 44 (4.5%) were underweight, 728 (75.8%) were normal weight, 188 were overweight,  
43 or obese (19.5%). Further, 127 children had highly pronated foot posture,  $FPI > 10$ . Of these,  
44 12 (9.4%) were underweight, 94 (74.0%) were normal weight, and 21 (16.5%) were  
45 overweight or obese.  
46  
47  
48  
49  
50  
51  
52  
53  
54

## 55 Discussion

56 This study is the largest investigation to explore paediatric foot posture using the FPI,  
57 paediatric anthropometry using BMI, and to analyse the regularly cited influence of increased  
58 body weight as a potentiating factor for flatfeet across childhood. This investigation of  
59  
60

1  
2  
3 paediatric foot posture includes children aged from three to 15 years, superseding previous,  
4 smaller or age-limited, studies[26,27].

5  
6 This study confirms the pronated foot as the common foot posture of childhood, with mean  
7 FPI of +4, and 3-point standard deviation, such that average normal FPI range for children  
8 aged three to 15 years was between the FPI range +1 to +7 (mean +/- SD). These findings  
9  
10  
11  
12  
13  
14  
15  
16  
17  
18  
19  
20  
21  
22  
23  
24  
25  
26  
27  
28  
29  
30  
31  
32  
33  
34  
35  
36  
37  
38  
39  
40  
41  
42  
43  
44  
45  
46  
47  
48  
49  
50  
51  
52  
53  
54  
55  
56  
57  
58  
59  
60  
This study confirms the pronated foot as the common foot posture of childhood, with mean FPI of +4, and 3-point standard deviation, such that average normal FPI range for children aged three to 15 years was between the FPI range +1 to +7 (mean +/- SD). These findings concur with the recent cross-sectional investigation of 1762 children aged six to 11 years [27]. Similarly to Gijon-Nogueron et al [27], we found that the mean FPI scores reduced with age, in non-linear pattern, and within a wide range. The standard deviation approximated 75% of the FPI mean at every age, confirming the considerable and normal variation in foot posture across childhood.

The greatest number of children across all ages displayed FPI within the 0 to +5 FPI range, ie normal foot posture. Next common were children with pronated feet. The least common FPI categories were either supinated or highly pronated, indicative of the foot types that should arrest the attention of clinicians, as less usual presentations. Flatfoot or pronated foot posture was generally found to decline with age, but mean reduction was non-linear and modest, from +6 at age three years, to +3 at 14 years. Importantly, the normal FPI range of variation was broad: -1 to +11 at age three years, and FPI +3 to +9 at age 14 years.

The relationship between increased BMI and flatfeet is again refuted by the findings of this study which found that only 16.5% of the children with highly pronated feet, were also overweight or obese. Similar results have been found in other recent studies [26] [40], contrasting with many older studies which asserted that heavier, fatter children have flatter feet. Importantly, the previous studies all assessed foot posture using a footprint based method of foot posture assessment [5,41,42], a method which may well represent adipose tissue spread with weight bearing, rather than anatomical foot morphology, more directly evaluated using the FPI [25,26]. Whilst it is concerning to find that 21% of the children in this study were overweight or obese, association with flatfeet is not found.

The availability of average FPI whole scores, enables clinicians to inform parents as to what is 'average' and what is 'normal' at any age, as statistically defined. The availability of FPI scores within one standard deviation above and below the mean, enables clinicians to confirm for parents that their child approximates with two-thirds, or 68%, of children for a specific age. Further, FPI scores within two standard deviations above and below the mean, enable

1  
2  
3 clinicians to inform parents that their child is within the normal 95% range, approximating  
4 one-quarter, or 27%, of same age children. Such reference data helps appreciation of the  
5 range of 'normal range' for foot posture, similarly to that for the onset of independent  
6 walking (age range of 10 to 16 months, mean age approximating 12 to 13 months)[18].  
7  
8  
9

10  
11 The focus of this investigation has been to better elucidate the normal range of foot posture  
12 across childhood, as is commonly assessed by many clinicians using the FPI. Simultaneously,  
13 the authors aimed to provide clinicians with a robust reference guide of normal values within  
14 statistical bounds. The culmination of this aim is provided as a reference Table (Table 4). The  
15 scale of this investigation renders its findings stronger than those of the 1000 Norms protocol  
16 for most age (year) groups, as the comparative number of participants reveals. The 1000  
17 Norms protocol will include: ages 3 to 9 years, 140 (20 per age year); ages 10 to 19 years,  
18 160 (16 per age year)[43]. By comparison, this study informs for: ages 3 to 9 years, 2796 (20  
19 to 764 per age year); ages 10 to 15 years, 1304 (1 to 634 per age year).  
20  
21  
22  
23  
24  
25  
26  
27  
28

29 Clinicians must move beyond flatfoot posture appearance as an indicator for intervention, and  
30 instead appreciate the range of normal variation, and only respond to more pertinent factors  
31 as outlined by the 3QQ (3 Quick Questions) screening tool (addressing pain presentations,  
32 left versus right limb symmetry, paediatric age range)[20]. Clinicians need to appreciate the  
33 normal range of many developmental features, yet simultaneously be alert to the level at  
34 which clinical concern should be raised. The tabulated reference guide provided from this  
35 study, will be of immediate clinical relevance.  
36  
37  
38  
39  
40  
41  
42

43 The striking finding of this study is not that paediatric flexible flatfoot is largely normal, it is  
44 that the supinated paediatric foot is far more likely to be abnormal, especially at age three and  
45 four years. An FPI of -2 or less, must be considered 'abnormal' until shown otherwise, as it is  
46 outside normal range at any age, and should prompt neurological assessment.  
47  
48  
49  
50

51 Limitations of this investigation include the cross-sectional nature of the design and the  
52 ethnicity of participants (largely Caucasian). Further, the sample does not evenly represent  
53 children from each country, nor each year of age, hence caution is indicated for ages three to  
54 seven years and 14 to 15 years where sampling was least. In addition, consideration that this  
55 study is a collation of smaller discrete studies, and should be consider measurement errors,  
56  
57  
58  
59  
60

1  
2  
3 although all followed the same protocol [3]. Prospective data avails stronger evidence of foot  
4 posture change over time [4].  
5  
6  
7

### 8 **Conclusions**

9  
10 This is the largest study of paediatric foot posture to date. Importantly, the main finding is to  
11 denounce the paediatric flatfoot as deviant. This study confirms that the 'flat' or pronated  
12 foot is the common foot posture of childhood, with FPI score of +4(3) the average finding. A  
13 wide normal range of foot posture across childhood is confirmed (16 FPI points, ie -2 to  
14 +12).  
15  
16  
17

18 The reference data produced from the findings of this study will assist clinicians in  
19 standardised decision-making.  
20  
21

22 Increased paediatric BMI was not associated with flatter feet, questioning the validity of  
23 footprint-derived measures.  
24  
25  
26  
27  
28  
29  
30  
31  
32  
33  
34  
35  
36  
37  
38  
39  
40  
41  
42  
43  
44  
45  
46  
47  
48  
49  
50  
51  
52  
53  
54  
55  
56  
57  
58  
59  
60



## References

- 1 Carli A, Saran N, Kruijt J, *et al.* Physiological referrals for paediatric musculoskeletal complaints: A costly problem that needs to be addressed. *Paediatr Child Heal* 2012;**17**.
- 2 Pfeiffer M, Kotz R, Ledl T, *et al.* Prevalence of flat foot in preschool-aged children. *Pediatrics* 2006;**118**:634–9. doi:10.1542/peds.2005-2126
- 3 Drefus L, PT DPT, Kedem P, *et al.* Reliability of the Arch Height Index as a Measure of Foot Structure in Children. *Pediatr Phys Ther* 2017;**29**:83–8. doi:10.1097/PEP.0000000000000337
- 4 Redmond AC, Crosbie J, Ouvrier RA. Development and validation of a novel rating system for scoring standing foot posture: The Foot Posture Index. *Clin Biomech* 2006;**21**:89–98. doi:10.1016/j.clinbiomech.2005.08.002
- 5 Chen KC, Yeh CJ, Kuo JF, *et al.* Footprint analysis of flatfoot in preschool-aged children. *Eur J Pediatr* 2011;**170**:611–7. doi:10.1007/s00431-010-1330-4
- 6 Chang CH, Chen YC, Yang WT, *et al.* Flatfoot diagnosis by a unique bimodal distribution of footprint index in children. *PLoS One* 2014;**9**. doi:10.1371/journal.pone.0115808
- 7 Nemeth B. The diagnosis and management of common childhood orthopedic disorders. *Curr Probl Pediatr Adolesc Health Care* 2011;**41**:2–28. doi:10.1016/j.cppeds.2010.10.004
- 8 Uden H, Scharfbillig R, Causby R. The typically developing paediatric foot: How flat should it be? A systematic review. *J Foot Ankle Res.* 2017;**10**. doi:10.1186/s13047-017-0218-1
- 9 Sadeghi-Demneh E, Azadinia F, Jafarian F, *et al.* Flatfoot and obesity in school-age children: a cross-sectional study. *Clin Obes* 2016;**6**:42–50. doi:10.1111/cob.12125
- 10 Evans AM, Rome K, Peet L. The foot posture index, ankle lunge test, Beighton scale and the lower limb assessment score in healthy children: A reliability study. *J Foot Ankle Res* 2012;**5**. doi:10.1186/1757-1146-5-1
- 11 Martínez-Nova A, Gijón-Noguerón G, Alfageme-García P, *et al.* Foot posture development in children aged 5 to 11 years: A three-year prospective study. *Gait Posture* 2018;**62**. doi:10.1016/j.gaitpost.2018.03.032
- 12 Mickle KJ, Steele JR, Munro BJ. Is the foot structure of preschool children moderated by gender? *J Pediatr Orthop* 2008;**28**:593–6. doi:10.1097/BPO.0b013e318173f782
- 13 Stolzman S, Irby MB, Callahan AB, *et al.* Pes planus and paediatric obesity: a systematic review of the literature. *Clin. Obes.* 2015;**5**:52–9. doi:10.1111/cob.12091
- 14 Kothari A, Dixon PC, Stebbins J, *et al.* The relationship between quality of life and

- 1  
2  
3 foot function in children with flexible flatfeet. *Gait Posture* 2015;**41**:786–90.  
4 doi:10.1016/j.gaitpost.2015.02.012  
5
- 6  
7 15 Lin CJ, Lai KA, Kuan TS, *et al.* Correlating factors and clinical significance of  
8 flexible flatfoot in preschool children. *J Pediatr Orthop* 2001;**21**:378–82.  
9 doi:10.1097/01241398-200105000-00022  
10
- 11 16 Labovitz JM. The algorithmic approach to pediatric flexible pes planovalgus. *Clin*  
12 *Podiatr Med Surg* 2006;**23**:57–76. doi:10.1016/j.cpm.2005.10.001  
13
- 14 17 Evans AM. The flat-footed child -- to treat or not to treat: what is the clinician to do? *J*  
15 *Am Podiatr Med Assoc* 2008;**98**:386–93. doi:10.7547/0980386  
16
- 17 18 Evans A. *Pocket Podiatry: Paediatrics*. 2010. doi:10.1016/B978-0-7020-3031-  
18 4.00017-1  
19
- 20 19 Gijon-nogueron G, Sanchez-rodriguez R, Lopezosa-reca E, *et al.* Normal Values of the  
21 Foot Posture Index in a Young Adult Spanish Population. *J Am Pod Med Assoc*  
22 2015;**105**:42–6. doi:10.7547/8750-7315-105.1.42  
23
- 24 20 Evans AM. Mitigating clinician and community concerns about children’s flatfeet,  
25 intoeing gait, knock knees or bow legs. *J. Paediatr. Child Health*. 2017;**53**:1050–3.  
26 doi:10.1111/jpc.13761  
27
- 28 21 Evans AM, Rome K. A cochrane review of the evidence for non-surgical interventions  
29 for flexible pediatric flat feet. *Eur. J. Phys. Rehabil. Med*. 2011;**47**:69–89.  
30 doi:10.1002/14651858  
31
- 32 22 Rome K, Ashford RL, Evans A. Non-surgical interventions for paediatric pes planus.  
33 *Cochrane Database Syst. Rev*. 2007. doi:10.1002/14651858.CD006311  
34
- 35 23 Kane K. Foot orthoses for pediatric flexible flatfoot: evidence and current practices  
36 among canadian physical therapists. *Pediatr Phys Ther* 2015;**27**:53–9.  
37 doi:10.1097/PEP.0000000000000106  
38
- 39 24 Harris EJ. The Natural History and Pathophysiology of Flexible Flatfoot. *Clin. Podiatr.*  
40 *Med. Surg*. 2010;**27**:1–23. doi:10.1016/j.cpm.2009.09.002  
41
- 42 25 Redmond AC, Crane YZ, Menz HB. Normative values for the Foot Posture Index. *J*  
43 *Foot Ankle Res* 2008;**1**:6. doi:10.1186/1757-1146-1-6  
44
- 45 26 Evans AM, Karimi L. The relationship between paediatric foot posture and body mass  
46 index: do heavier children really have flatter feet? *J Foot Ankle Res* 2015;**8**:46.  
47 doi:10.1186/s13047-015-0101-x  
48
- 49 27 Gijon-Nogueron G, Montes-Alguacil J, Alfageme-Garcia P, *et al.* Establishing  
50 normative foot posture index values for the paediatric population: a cross-sectional  
51 study. *J Foot Ankle Res* 2016;**9**:24. doi:10.1186/s13047-016-0156-3  
52
- 53 28 Morrison SC, Ferrari J. Inter-rater reliability of the Foot Posture Index (FPI-6) in the  
54 assessment of the paediatric foot. *J Foot Ankle Res* 2009;**2**. doi:10.1186/1757-1146-2-  
55 26  
56  
57  
58  
59  
60

- 1  
2  
3 29 Banwell HA, Paris ME, Mackintosh S, *et al.* Paediatric flexible flat foot: How are we  
4 measuring it and are we getting it right? A systematic review. *J. Foot Ankle Res.*  
5 2018;**11**. doi:10.1186/s13047-018-0264-3  
6  
7  
8 30 Evans AM. The paediatric flat foot and general anthropometry in 140 Australian  
9 school children aged 7 - 10 years. *J Foot Ankle Res* 2011;**4**. doi:10.1186/1757-1146-4-  
10 12  
11  
12 31 Targett R, Mathieson I. Evaluation of foot posture development in children between  
13 three and eleven years of age using the foot posture index. *J Foot Ankle Res*  
14 2010;**3**:P17. doi:10.1186/1757-1146-3-S1-P17  
15  
16 32 Scharfbillig RW, Jones S, Scutter S. Sever's disease-Does it effect quality of life? *Foot*  
17 2009;**19**:36–43. doi:10.1016/j.foot.2008.07.004  
18  
19  
20 33 Williams CM, Tinley P, Curtin M, *et al.* Hand preference in children with an  
21 idiopathic toe walking gait. *Acta Paediatr Int J Paediatr* 2012;**101**.  
22 doi:10.1111/j.1651-2227.2011.02512.x  
23  
24 34 Keenan A-M, Redmond AC, Horton M, *et al.* The Foot Posture Index: Rasch analysis  
25 of a novel, foot-specific outcome measure. *Arch Phys Med Rehabil* 2007;**88**:88–93.  
26 doi:10.1016/j.apmr.2006.10.005  
27  
28 35 Sobradillo B, Aguirre A, Aresti U, Bilbao C F-RC, Lizárraga A *et al.* Curvas y tablas  
29 de crecimiento (estudio longitudinal y transversal). *Fund. Faustino Orbeagozo*  
30 Eizaguirre. 2004.[http://www.aepap.org/pdf/f\\_orbeagozo\\_04.pdf](http://www.aepap.org/pdf/f_orbeagozo_04.pdf)  
31  
32  
33 36 Australian Bureau of Statistics. Australian Health Survey: First Results, 2011-12. *CAT*  
34 *no 4364055003* 2012;:1–61. doi:ABS cat. no. 4364.0.55.003  
35  
36 37 Noo, Ncmp. National Child Measurement Programme. Changes in children ' s body  
37 mass index. 2013;:1–  
38 36.[http://www.noo.org.uk/uploads/doc/vid\\_17929\\_NCMP\\_Changes\\_children.pdf](http://www.noo.org.uk/uploads/doc/vid_17929_NCMP_Changes_children.pdf)  
39  
40  
41 38 Redmond AC, Crane YZ, Menz HB. Normative values for the Foot Posture Index. *J*  
42 *Foot Ankle Res* 2008;**1**:6. doi:10.1186/1757-1146-1-6  
43  
44 39 Menz HB. Analysis of paired data in physical therapy research: time to stop double-  
45 dipping? *J Orthop Sports Phys Ther* 2005;**35**:477–8. doi:10.2519/jospt.2005.0108  
46  
47 40 Gijon-Nogueron G, Montes-Alguacil J, Martinez-Nova A, *et al.* Overweight, obesity  
48 and foot posture in children: A cross-sectional study. *J. Paediatr. Child Health.* 2016.  
49 doi:10.1111/jpc.13314  
50  
51  
52 41 Mickle KJ, Steele JR, Munro BJ. The feet of overweight and obese young children: are  
53 they flat or fat? *Obesity (Silver Spring)* 2006;**14**:1949–53. doi:10.1038/oby.2006.227  
54  
55 42 Villarroya MA, Esquivel JM, Tomás C, *et al.* Assessment of the medial longitudinal  
56 arch in children and adolescents with obesity: Footprints and radiographic study. *Eur J*  
57 *Pediatr* 2009;**168**. doi:10.1007/s00431-008-0789-8  
58  
59 43 McKay MJ, Baldwin JN, Ferreira P, *et al.* 1000 Norms Project: Protocol of a cross-

1  
2  
3  
4  
5  
6  
7  
8  
9  
10  
11  
12  
13  
14  
15  
16  
17  
18  
19  
20  
21  
22  
23  
24  
25  
26  
27  
28  
29  
30  
31  
32  
33  
34  
35  
36  
37  
38  
39  
40  
41  
42  
43  
44  
45  
46  
47  
48  
49  
50  
51  
52  
53  
54  
55  
56  
57  
58  
59  
60

sectional study cataloging human variation. *Physiother (United Kingdom)* 2016;**102**:50–6. doi:10.1016/j.physio.2014.12.002

For peer review only

1  
2  
3 **Legend text**  
4

5 Figure 1 Frequency plot of FPI values (n=3217)  
6

7 Figure 2 FPI frequency plot for gender  
8

9 Figure 3 Simple error bars display the relationship between FPI and age.  
10  
11

12 Figure 4 Frequency plot of BMI category versus FPI category  
13  
14  
15  
16  
17  
18  
19  
20  
21  
22  
23  
24  
25  
26  
27  
28  
29  
30  
31  
32  
33  
34  
35  
36  
37  
38  
39  
40  
41  
42  
43  
44  
45  
46  
47  
48  
49  
50  
51  
52  
53  
54  
55  
56  
57  
58  
59  
60

For peer review only

Table 1

Descriptive statistics for the amalgamated data sets. Due to variation between the constituent datasets, main results emerged from the variables of age, BMI, FPI Left. Gender ratio was 1699 males: 1518 females.

| Variable                 | N    | Range | Minimum | Maximum | Mean  | SD   |
|--------------------------|------|-------|---------|---------|-------|------|
| Age (years)              | 3217 | 12    | 3       | 15      | 8.67  | 2.02 |
| BMI (kg/m <sup>2</sup> ) | 3217 | 28.57 | 10.57   | 39.14   | 19.08 | 4.05 |
| FPI Right                | 3217 | 16    | -4      | 12      | 4.20  | 3.00 |
| FPI Left                 | 3217 | 16    | -4      | 12      | 4.11  | 2.92 |

Table 2

The FPI range which refer to foot posture categories. were collated for each year of age. The median FPI total score across the study population was 4(3) points. with the trend of reduced FPI with increased age confirmed.

| Age (yrs) | No. /Age | FPI-6 total score – <i>Foot posture category cut-offs</i> |             |             |               |          |      |       |
|-----------|----------|-----------------------------------------------------------|-------------|-------------|---------------|----------|------|-------|
|           |          | Supinated                                                 | Normal      | Pronated    | High pronated | Mean FPI | SD   | Range |
| 3         | 21       | 2                                                         | 4           | 14          | 1             | 6.38     | 3.03 | 11    |
| 4         | 20       | 1                                                         | 5           | 12          | 2             | 6.7      | 2.60 | 11    |
| 5         | 55       | 5                                                         | 34          | 13          | 3             | 4.15     | 2.81 | 12    |
| 6         | 388      | 29                                                        | 213         | 132         | 14            | 4.45     | 2.80 | 15    |
| 7         | 536      | 51                                                        | 296         | 164         | 25            | 4.3      | 2.93 | 16    |
| 8         | 473      | 48                                                        | 271         | 131         | 23            | 4.01     | 2.95 | 16    |
| 9         | 625      | 74                                                        | 362         | 175         | 14            | 3.82     | 2.77 | 16    |
| 10        | 497      | 62                                                        | 291         | 123         | 21            | 3.69     | 2.86 | 15    |
| 11        | 377      | 50                                                        | 194         | 119         | 14            | 4.24     | 3.02 | 16    |
| 12        | 144      | 24                                                        | 65          | 48          | 7             | 4.22     | 3.23 | 14    |
| 13        | 33       | 1                                                         | 17          | 12          | 3             | 5.18     | 2.98 | 10    |
| 14        | 22       | 4                                                         | 12          | 6           | 0             | 3.14     | 3.40 | 12    |
| 15        | 26       | 3                                                         | 12          | 11          | 0             | 4.19     | 3.31 | 12    |
| Total     | 3217     | 354(11%)                                                  | 1776(55.2%) | 960(29.84%) | 127(3.95%)    | 4.2      | 3    | 16    |

Table 3

FPI total scores versus age year groups.

| FPI/<br>age   | -4  | -3  | -2  | -1  | 0   | 1   | 2    | 3    | 4    | 5   | 6    | 7   | 8   | 9   | 10  | 11  | 12  | Total / n |
|---------------|-----|-----|-----|-----|-----|-----|------|------|------|-----|------|-----|-----|-----|-----|-----|-----|-----------|
| 3             | 0   | 0   | 0   | 1   | 1   | 0   | 0    | 1    | 2    | 1   | 2    | 0   | 3   | 4   | 4   | 0   | 2   | 21        |
| 4             | 0   | 0   | 0   | 0   | 1   | 0   | 0    | 0    | 3    | 3   | 5    | 2   | 2   | 1   | 1   | 2   | 0   | 20        |
| 5             | 0   | 0   | 1   | 0   | 6   | 3   | 7    | 11   | 7    | 3   | 6    | 2   | 2   | 1   | 1   | 4   | 1   | 55        |
| 6             | 0   | 1   | 3   | 6   | 24  | 31  | 45   | 46   | 47   | 38  | 69   | 30  | 19  | 11  | 6   | 8   | 4   | 388       |
| 7             | 1   | 6   | 4   | 3   | 39  | 43  | 48   | 72   | 69   | 55  | 90   | 33  | 22  | 27  | 14  | 7   | 3   | 536       |
| 8             | 1   | 2   | 1   | 8   | 36  | 47  | 55   | 45   | 49   | 48  | 89   | 27  | 24  | 17  | 13  | 7   | 4   | 473       |
| 9             | 3   | 3   | 5   | 11  | 55  | 61  | 60   | 72   | 81   | 78  | 92   | 48  | 21  | 14  | 9   | 8   | 4   | 625       |
| 10            | 0   | 5   | 3   | 14  | 41  | 59  | 68   | 71   | 54   | 39  | 61   | 23  | 17  | 12  | 17  | 9   | 4   | 497       |
| 11            | 1   | 3   | 4   | 10  | 29  | 22  | 31   | 48   | 58   | 32  | 52   | 29  | 26  | 14  | 10  | 3   | 5   | 377       |
| 12            | 0   | 2   | 2   | 6   | 17  | 9   | 12   | 7    | 19   | 11  | 19   | 14  | 12  | 6   | 5   | 3   | 0   | 144       |
| 13            | 0   | 0   | 0   | 0   | 1   | 2   | 1    | 6    | 2    | 5   | 2    | 7   | 2   | 2   | 3   | 0   | 0   | 33        |
| 14            | 0   | 1   | 2   | 0   | 1   | 3   | 2    | 3    | 4    | 0   | 1    | 2   | 0   | 2   | 1   | 0   | 0   | 22        |
| 15            | 0   | 1   | 2   | 0   | 0   | 1   | 3    | 4    | 3    | 2   | 2    | 3   | 0   | 3   | 2   | 0   | 0   | 26        |
| Total/<br>FPI | 6   | 24  | 27  | 59  | 251 | 281 | 332  | 386  | 398  | 315 | 490  | 220 | 150 | 114 | 86  | 51  | 27  | 3217      |
| %             | 0.2 | 0.7 | 0.8 | 1.8 | 7.8 | 8.7 | 10.3 | 12.0 | 12.4 | 9.8 | 15.2 | 6.8 | 4.7 | 3.5 | 2.7 | 1.6 | 0.8 | 100       |

?: Percentage, SD: Standard Deviation, R: Range



Table 4  
FPI total scores versus age year groups, **showing normal range, and FPI outside normal range.**

| Age | -2SD  | -1SD  | Mean        | +1SD  | +2SD  | Sample size | SD  | FPI Median (+/- 1SD) | FPI Median (+/- 2SD) | Clinical Alert FPI > +/-2SD |
|-----|-------|-------|-------------|-------|-------|-------------|-----|----------------------|----------------------|-----------------------------|
| 3   | 0.02  | 3.60  | <b>7.19</b> | 10.78 | 12.78 | 21          | 3.6 | 8 (4 – 12)           | 8 (0 – 12)           | < <b>0</b> or > <b>12</b>   |
| 4   | 1.11  | 3.76  | <b>6.40</b> | 9.04  | 11.79 | 20          | 2.6 | 6 (3 – 9)            | 6 (0 – 12)           | < <b>0</b> or > <b>12</b>   |
| 5   | -2.41 | 0.91  | <b>4.22</b> | 7.54  | 10.68 | 55          | 3.3 | 3 (0 – 6)            | 3 (-3 – 9)           | < <b>-3</b> or > <b>9</b>   |
| 6   | -1.37 | 1.50  | <b>4.36</b> | 7.22  | 10.71 | 388         | 2.9 | 4 (1 – 7)            | 4 (-2 – 10)          | < <b>-2</b> or > <b>10</b>  |
| 7   | -1.53 | 1.40  | <b>4.32</b> | 7.24  | 10.67 | 536         | 2.9 | 4 (1 – 7)            | 4 (-2 – 10)          | < <b>-2</b> or > <b>10</b>  |
| 8   | -1.64 | 1.33  | <b>4.29</b> | 7.25  | 10.15 | 473         | 2.9 | 4 (1 – 7)            | 4 (-1 – 10)          | < <b>-1</b> or > <b>10</b>  |
| 9   | -1.74 | 1.11  | <b>3.96</b> | 6.81  | 9.83  | 625         | 2.8 | 4 (1 – 7)            | 4 (-1 – 10)          | < <b>-1</b> or > <b>10</b>  |
| 10  | -2.31 | 0.73  | <b>3.77</b> | 6.81  | 9.92  | 497         | 3.0 | 3 (0 – 6)            | 4 (-3 – 9)           | < <b>-3</b> or > <b>9</b>   |
| 11  | -1.77 | 1.28  | <b>4.33</b> | 7.38  | 10.20 | 377         | 3.0 | 4 (1 – 7)            | 4 (-2 – 10)          | < <b>-2</b> or > <b>10</b>  |
| 12  | -2.43 | 0.92  | <b>4.26</b> | 7.61  | 10.73 | 144         | 3.3 | 4 (1 – 7)            | 4 (-2 – 10)          | < <b>-2</b> or > <b>10</b>  |
| 13  | -0.03 | 2.71  | <b>5.45</b> | 8.19  | 11.18 | 33          | 2.7 | 5 (2 – 8)            | 5 (-1 – 11)          | < <b>-1</b> or > <b>11</b>  |
| 14  | -3.89 | -0.28 | <b>3.32</b> | 6.92  | 9.92  | 22          | 3.6 | 4 (1 – 7)            | 4 (-2 – 9)           | < <b>-2</b> or > <b>9</b>   |
| 15  | -2.84 | 0.77  | <b>4.38</b> | 7.99  | 11.18 | 26          | 3.6 | 4 (0 – 8)            | 4 (-4 – 12)          | < <b>-4</b> or > <b>12</b>  |

1  
2  
3  
4  
5  
6  
7  
8  
9  
10  
11  
12  
13  
14  
15  
16  
17  
18  
19  
20  
21  
22  
23  
24  
25  
26  
27  
28  
29  
30  
31  
32  
33  
34  
35  
36  
37  
38  
39  
40  
41  
42  
43  
44  
45  
46  
47  
48  
49  
50  
51  
52  
53  
54  
55  
56  
57  
58  
59  
60**Table 5**

FPI and BMI category distributions, showing greatest concordance between normal FPI and normal BMI.

|                 |                | Underweight     | Normal            | Overweight or Obese | Total |
|-----------------|----------------|-----------------|-------------------|---------------------|-------|
| Supinated       | Count          | 18 <sup>a</sup> | 260 <sup>a</sup>  | 76 <sup>a</sup>     | 354   |
|                 | Expected count | 15.6            | 264.9             | 73.5                | 354   |
| Normal          | Count          | 68 <sup>a</sup> | 1325 <sup>a</sup> | 383 <sup>a</sup>    | 1776  |
|                 | Expected count | 78.4            | 1328.8            | 368.8               | 1776  |
| Pronated        | Count          | 44 <sup>a</sup> | 728 <sup>a</sup>  | 188 <sup>a</sup>    | 960   |
|                 | Expected count | 42.4            | 718.3             | 199.3               | 960   |
| Highly Pronated | Count          | 12 <sup>a</sup> | 94 <sup>b</sup>   | 21 <sup>b</sup>     | 127   |
|                 | Expected count | 5.6             | 95                | 26.4                | 127   |
| Total           | Count          | 142             | 2407              | 668                 | 3217  |

Note: superscript letters denote a subset of FPI (Left) categories whose column proportions did not differ significantly from each other at the level of 0.05.

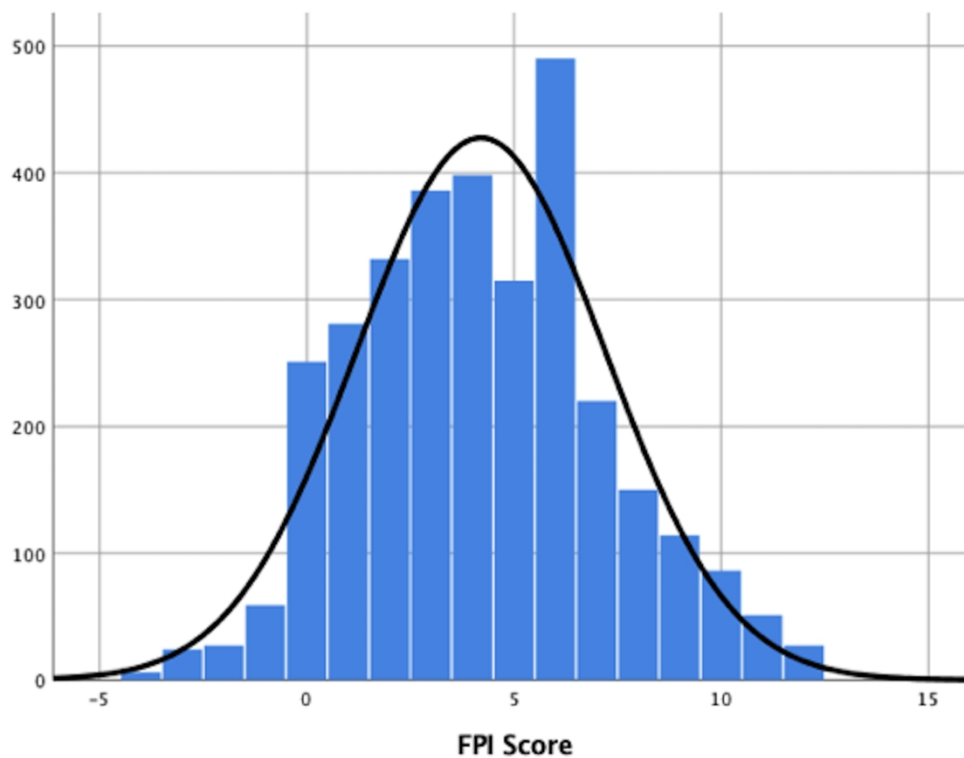

Figure 1 Frequency plot of FPI values (n=3217)

188x157mm (300 x 300 DPI)

1  
2  
3  
4  
5  
6  
7  
8  
9  
10  
11  
12  
13  
14  
15  
16  
17  
18  
19  
20  
21  
22  
23  
24  
25  
26  
27  
28  
29  
30  
31  
32  
33  
34  
35  
36  
37  
38  
39  
40  
41  
42  
43  
44  
45  
46  
47  
48  
49  
50  
51  
52  
53  
54  
55  
56  
57  
58  
59  
60

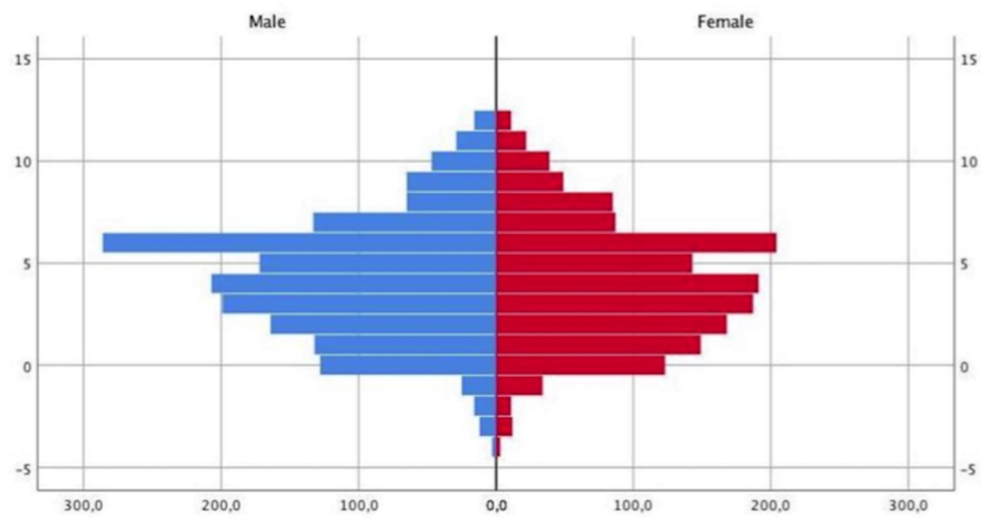

Figure 2 FPI frequency plot for gender

260x151mm (300 x 300 DPI)

1  
2  
3  
4  
5  
6  
7  
8  
9  
10  
11  
12  
13  
14  
15  
16  
17  
18  
19  
20  
21  
22  
23  
24  
25  
26  
27  
28  
29  
30  
31  
32  
33  
34  
35  
36  
37  
38  
39  
40  
41  
42  
43  
44  
45  
46  
47  
48  
49  
50  
51  
52  
53  
54  
55  
56  
57  
58  
59  
60

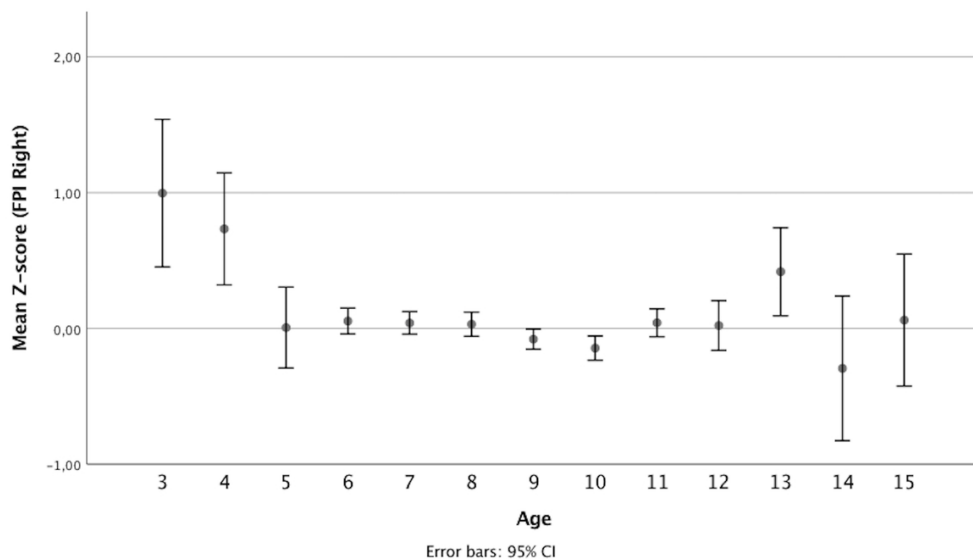

Figure 3 Simple error bars display the relationship between FPI and age.

99x58mm (300 x 300 DPI)

1  
2  
3  
4  
5  
6  
7  
8  
9  
10  
11  
12  
13  
14  
15  
16  
17  
18  
19  
20  
21  
22  
23  
24  
25  
26  
27  
28  
29  
30  
31  
32  
33  
34  
35  
36  
37  
38  
39  
40  
41  
42  
43  
44  
45  
46  
47  
48  
49  
50  
51  
52  
53  
54  
55  
56  
57  
58  
59  
60

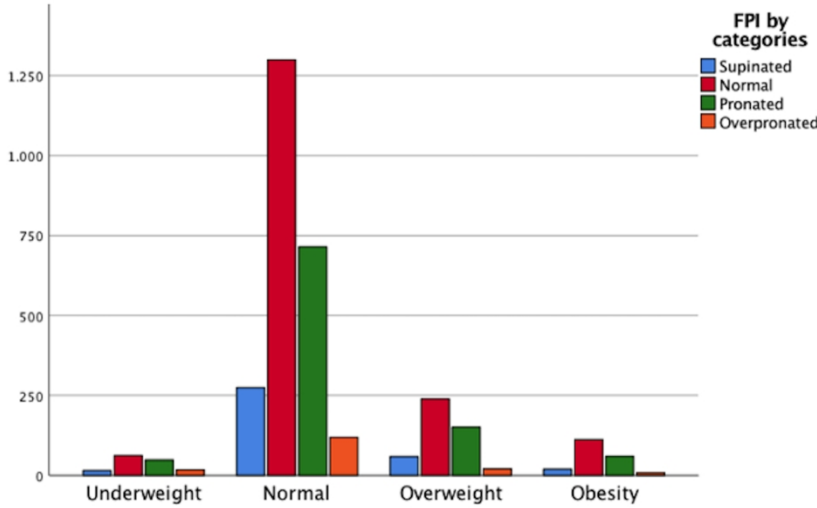

Figure 4 Frequency plot of BMI category versus FPI category  
89x67mm (600 x 600 DPI)

## STROBE Statement—checklist of items that should be included in reports of observational studies

|                              | Item No | Recommendation                                                                                                                                                                             | Page |
|------------------------------|---------|--------------------------------------------------------------------------------------------------------------------------------------------------------------------------------------------|------|
| <b>Title and abstract</b>    | 1       | (a) Indicate the study's design with a commonly used term in the title or the abstract                                                                                                     | 1-2  |
|                              |         | (b) Provide in the abstract an informative and balanced summary of what was done and what was found                                                                                        |      |
| <b>Introduction</b>          |         |                                                                                                                                                                                            |      |
| Background/rationale         | 2       | Explain the scientific background and rationale for the investigation being reported                                                                                                       | 4    |
| Objectives                   | 3       | State specific objectives, including any prespecified hypotheses                                                                                                                           | 4    |
| <b>Methods</b>               |         |                                                                                                                                                                                            |      |
| Study design                 | 4       | Present key elements of study design early in the paper                                                                                                                                    | 5    |
| Setting                      | 5       | Describe the setting, locations, and relevant dates, including periods of recruitment, exposure, follow-up, and data collection                                                            | 5    |
| Participants                 | 6       | (a) <i>Cohort study</i> —Give the eligibility criteria, and the sources and methods of selection of participants. Describe methods of follow-up                                            | 5    |
|                              |         | <i>Case-control study</i> —Give the eligibility criteria, and the sources and methods of case ascertainment and control selection. Give the rationale for the choice of cases and controls |      |
|                              |         | <i>Cross-sectional study</i> —Give the eligibility criteria, and the sources and methods of selection of participants                                                                      |      |
|                              |         | (b) <i>Cohort study</i> —For matched studies, give matching criteria and number of exposed and unexposed                                                                                   |      |
|                              |         | <i>Case-control study</i> —For matched studies, give matching criteria and the number of controls per case                                                                                 |      |
| Variables                    | 7       | Clearly define all outcomes, exposures, predictors, potential confounders, and effect modifiers. Give diagnostic criteria, if applicable                                                   | 5    |
| Data sources/<br>measurement | 8*      | For each variable of interest, give sources of data and details of methods of assessment (measurement). Describe comparability of assessment methods if there is more than one group       | 5    |
| Bias                         | 9       | Describe any efforts to address potential sources of bias                                                                                                                                  | -    |
| Study size                   | 10      | Explain how the study size was arrived at                                                                                                                                                  | 5    |
| Quantitative variables       | 11      | Explain how quantitative variables were handled in the analyses. If applicable, describe which groupings were chosen and why                                                               | 6    |
| Statistical methods          | 12      | (a) Describe all statistical methods, including those used to control for confounding                                                                                                      | 6    |
|                              |         | (b) Describe any methods used to examine subgroups and interactions                                                                                                                        | 6    |
|                              |         | (c) Explain how missing data were addressed                                                                                                                                                | -    |
|                              |         | (d) <i>Cohort study</i> —If applicable, explain how loss to follow-up was addressed                                                                                                        | 6    |
|                              |         | <i>Case-control study</i> —If applicable, explain how matching of cases and controls was addressed                                                                                         |      |
|                              |         | <i>Cross-sectional study</i> —If applicable, describe analytical methods taking account of sampling strategy                                                                               |      |
|                              |         | (e) Describe any sensitivity analyses                                                                                                                                                      |      |

1  
2  
3  
4  
5  
6  
7  
8  
9  
10  
11  
12  
13  
14  
15  
16  
17  
18  
19  
20  
21  
22  
23  
24  
25  
26  
27  
28  
29  
30  
31  
32  
33  
34  
35  
36  
37  
38  
39  
40  
41  
42  
43  
44  
45  
46  
47  
48  
49  
50  
51  
52  
53  
54  
55  
56  
57  
58  
59  
60**Results**

|                  |     |                                                                                                                                                                                                              |     |
|------------------|-----|--------------------------------------------------------------------------------------------------------------------------------------------------------------------------------------------------------------|-----|
| Participants     | 13* | (a) Report numbers of individuals at each stage of study—eg numbers potentially eligible, examined for eligibility, confirmed eligible, included in the study, completing follow-up, and analysed            | 7   |
|                  |     | (b) Give reasons for non-participation at each stage                                                                                                                                                         | -   |
|                  |     | (c) Consider use of a flow diagram                                                                                                                                                                           | -   |
| Descriptive data | 14* | (a) Give characteristics of study participants (eg demographic, clinical, social) and information on exposures and potential confounders                                                                     | 7-8 |
|                  |     | (b) Indicate number of participants with missing data for each variable of interest                                                                                                                          | -   |
|                  |     | (c) <i>Cohort study</i> —Summarise follow-up time (eg, average and total amount)                                                                                                                             |     |
| Outcome data     | 15* | <i>Cohort study</i> —Report numbers of outcome events or summary measures over time                                                                                                                          |     |
|                  |     | <i>Case-control study</i> —Report numbers in each exposure category, or summary measures of exposure                                                                                                         |     |
|                  |     | <i>Cross-sectional study</i> —Report numbers of outcome events or summary measures                                                                                                                           | 7-8 |
| Main results     | 16  | (a) Give unadjusted estimates and, if applicable, confounder-adjusted estimates and their precision (eg, 95% confidence interval). Make clear which confounders were adjusted for and why they were included | 7-8 |
|                  |     | (b) Report category boundaries when continuous variables were categorized                                                                                                                                    | 7-8 |
|                  |     | (c) If relevant, consider translating estimates of relative risk into absolute risk for a meaningful time period                                                                                             |     |
| Other analyses   | 17  | Report other analyses done—eg analyses of subgroups and interactions, and sensitivity analyses                                                                                                               |     |

**Discussion**

|                  |    |                                                                                                                                                                            |     |
|------------------|----|----------------------------------------------------------------------------------------------------------------------------------------------------------------------------|-----|
| Key results      | 18 | Summarise key results with reference to study objectives                                                                                                                   | 8   |
| Limitations      | 19 | Discuss limitations of the study, taking into account sources of potential bias or imprecision. Discuss both direction and magnitude of any potential bias                 | 8-9 |
| Interpretation   | 20 | Give a cautious overall interpretation of results considering objectives, limitations, multiplicity of analyses, results from similar studies, and other relevant evidence | 8-9 |
| Generalisability | 21 | Discuss the generalisability (external validity) of the study results                                                                                                      | 8-9 |

**Other information**

|         |    |                                                                                                                                                               |   |
|---------|----|---------------------------------------------------------------------------------------------------------------------------------------------------------------|---|
| Funding | 22 | Give the source of funding and the role of the funders for the present study and, if applicable, for the original study on which the present article is based | 1 |
|---------|----|---------------------------------------------------------------------------------------------------------------------------------------------------------------|---|

\*Give information separately for cases and controls in case-control studies and, if applicable, for exposed and unexposed groups in cohort and cross-sectional studies.

**Note:** An Explanation and Elaboration article discusses each checklist item and gives methodological background and published examples of transparent reporting. The STROBE checklist is best used in conjunction with this article (freely available on the Web sites of PLoS Medicine at <http://www.plosmedicine.org/>, Annals of Internal Medicine at <http://www.annals.org/>, and Epidemiology at <http://www.epidem.com/>). Information on the STROBE Initiative is available at [www.strobe-statement.org](http://www.strobe-statement.org).



# BMJ Open

## International normative data for paediatric foot posture assessment: a cross-sectional investigation.

|                                 |                                                                                                                                                                                                                                                                                                                                                                                                        |
|---------------------------------|--------------------------------------------------------------------------------------------------------------------------------------------------------------------------------------------------------------------------------------------------------------------------------------------------------------------------------------------------------------------------------------------------------|
| Journal:                        | <i>BMJ Open</i>                                                                                                                                                                                                                                                                                                                                                                                        |
| Manuscript ID                   | bmjopen-2018-023341.R3                                                                                                                                                                                                                                                                                                                                                                                 |
| Article Type:                   | Research                                                                                                                                                                                                                                                                                                                                                                                               |
| Date Submitted by the Author:   | 21-Feb-2019                                                                                                                                                                                                                                                                                                                                                                                            |
| Complete List of Authors:       | Gijon-Nogueron, Gabriel; Universidad de Malaga, Nursing and Podiatry<br>Martinez-Nova, Alfonso; Universidad de Extremadura, Nursing and Podiatry<br>Alfageme-Garcia, Pilar; Universidad de Extremadura, Nursing and Podiatry<br>Montes-Alguacil, Jesus; Universidad de Malaga, Nursing and Podiatry<br>Evans, Angela Margaret; La Trobe University College of Science Health and Engineering, Podiatry |
| <b>Primary Subject Heading</b>: | Paediatrics                                                                                                                                                                                                                                                                                                                                                                                            |
| Secondary Subject Heading:      | Epidemiology, Paediatrics, Rehabilitation medicine                                                                                                                                                                                                                                                                                                                                                     |
| Keywords:                       | Foot, Posture, Children, Paediatric, Flatfoot                                                                                                                                                                                                                                                                                                                                                          |
|                                 |                                                                                                                                                                                                                                                                                                                                                                                                        |

SCHOLARONE™  
Manuscripts

1  
2  
3 **International normative data for paediatric foot posture assessment: a cross-sectional**  
4 **investigation.**  
5  
6

7  
8 [Short title: Children's flatfeet – normal or not?]  
9

10  
11 \*Gabriel Gijon-Nogueron<sup>1,2</sup>, PhD ([gagijon@uma.es](mailto:gagijon@uma.es))  
12

13  
14 Alfonso Martinez-Nova<sup>3</sup>, PhD ([podoalf@unex.es](mailto:podoalf@unex.es))  
15

16  
17 Pilar Alfageme-Garcia<sup>3</sup>, PhD ([palfagemeg@unex.es](mailto:palfagemeg@unex.es))  
18

19  
20 Jesus Montes-Alguacil<sup>1</sup>, PhD ([jesmonalg@uma.es](mailto:jesmonalg@uma.es))  
21

22  
23 Angela Margaret Evans<sup>4</sup>, PhD ([angela.Evans@latrobe.edu.au](mailto:angela.Evans@latrobe.edu.au))  
24

- 25  
26 1. Department of Nursing and Podiatry, University of Malaga, Spain  
27  
28 2. Institute of Biomedical Research in Malaga (IBIMA), Malaga, Spain  
29  
30 3. Department of Nursing, University of Extremadura, Spain  
31  
32 4. Discipline of Podiatry, College of Science, Health and Engineering, La Trobe  
33  
34 University, Bundoora, Melbourne, 3086, Australia  
35  
36

37  
38 First and second author contributed equally in the study/paper.  
39

40  
41 \*Corresponding author: Gabriel Gijon-Nogueron, Department of Nursing and Podiatry,  
42 University of Malaga, Spain. Email: [gagijon@uma.es](mailto:gagijon@uma.es)  
43  
44

45  
46 Word count: 2979; Abstract: 206; References: 42; Tables: 5; Figures 4  
47  
48

49 **Financial support:** The University of Malaga through of Plan Propio de Investigacion and  
50 Fondo Europeo de Desarrollo Regional (FEDER) and Consejería de Economía e  
51 Infraestructura of the Junta de Extremadura (Project Ref. GR18178)  
52  
53

54 **Financial Disclosure:** The authors have no financial relationships relevant to this article.  
55

56  
57 **Conflict of Interest:** All authors have indicated no potential conflicts of interest.  
58

59 **Ethical approval:** All procedures performed in studies involving human participants were in  
60 accordance with the ethical standards of the institutional and/or national research committee

1  
2  
3 and with the 1964 Helsinki declaration and its later amendments or comparable ethical  
4 standards. (Universities of Malaga CEUMA 91/2016H, Extremadura ID 59/2012, University  
5 of Wales Institute, Cardiff and University of South Australia Charles Sturt University Ethics  
6 Committees approval number 10/291 and 89/2012).  
7  
8  
9

10 **Informed consent:** Informed consent was obtained from all individual participants (parents),  
11  
12 whose children were included in the study.  
13

14 **Data sharing statement:** Available data can be obtained by contacting the corresponding  
15  
16 author.  
17

18  
19 **Contributors:** GG-N, AM-N, and AME contributed to the conception of this study. GG-N,  
20 AM-N, and AME did the statistical analysis. Data collectors were collected in Spain JM-A  
21 and PG-A and in Australia AME. GG-N, AM-N, PG-A, JM-A and AME were involved in the  
22 writing and in the review of the manuscript.  
23  
24  
25

26 **Acknowledgements** The authors would like to express their gratitude to the University of  
27 Malaga for their support through Plan Propio de Investigacion and Sergio López Casares,  
28 manager of projects of the University of Extremadura.  
29  
30  
31  
32  
33  
34  
35  
36  
37  
38  
39  
40  
41  
42  
43  
44  
45  
46  
47  
48  
49  
50  
51  
52  
53  
54  
55  
56  
57  
58  
59  
60

## Abstract

**Objectives:** The Foot Posture Index (FPI) is an observational tool designed to measure the position of the foot. The objective of this study was to establish international reference data for foot posture across childhood, and influence of Body Mass Index (BMI) on paediatric foot posture.

**Design:** Cross-sectional study

**Setting and participants:** The dataset comprised 3217 healthy children, aged from three to 15 years. Contributing data were acquired from Spain, UK, and Australia.

**Interventions:** Foot posture was described by means and z-score of the foot posture index (FPI) and the height and weight of each subject was measured and the body mass index (BMI) was calculated.

**Results:** The foot posture of 3217 children were reviewed. A pronated (FPI  $\geq +6$ ) foot posture was found in 960 (29.8%) children, a normal (FPI 0 to +6) foot posture in 1776 (55.2%), and a highly-pronated (FPI +10) foot posture was found in 127 children (3.9%), (range -4 to +12 FPI). Less than 11% were found to have a supinated foot type (n = 354). Approximately 20% of children were overweight/obese, but correlation between BMI and FPI was weak and inverse ( $r = -0.066$ ,  $p < 0.01$ ), refuting the relationship between increased body mass and flatfeet.

**Conclusions:** This study confirms that the 'flat' or pronated foot is the common foot posture of childhood, with FPI score of +4(3) the average finding. Trend indicated a less 'flat' foot with age, although non-linear. A wide normal range of foot posture across childhood is confirmed.

### Strengths and limitations of this study

- First study to measure foot posture with any method in a sample of 3217 children
- Comparison between different countries strengthens the study findings
- The sample does not balance the number of children from each country
- The disproportionate numbers of children within each age year group

**Key Words:** Foot, Children, Posture, Paediatric, Foot posture index, Flatfoot

## Introduction

Paediatric foot posture is a common parental concern, a frequent presentation to clinicians, and an area of dispute regarding both the need for treatment [1] [2]. The term ‘flatfoot’, has referred to a foot which is nearly or completely contacting the ground [3], and has been evaluated using foot posture [4], footprints [5], radiological and anthropometric measures [6] and is often poorly defined [7]. From a clinical practice perspective, there is no single universally accepted diagnostic technique.

A systematic review [8] has addressed flatfoot and clinical measures, in healthy children, finding ‘flatfoot’ the expected foot posture before eight years of age, due to young osseous structures, ligament laxity, increased adipose tissue, and immature neuromuscular control [9,10]. With variation, flatfoot posture reduces across a child’s first ten years [11–13]. Some children with flexible flatfeet experience lower limb pain [14] with compromised gait [15]. The quandary for clinicians is discerning when a child’s foot is within or outside the developmental range, so that parents may be reassured, advised to monitor with growth, or to treat [16,17].

Children’s foot posture has been interpreted with footprint assessments in many studies, with inference of a problematic ‘flatfoot’ when the footprint area is increased. Throughout early childhood, children continue to develop a skeletal medial longitudinal foot arch [18], different from the adult population [19], and altered children’s foot posture must be evaluated in context of developmental stage and the presence/absence of systemic influences, such as hypotonia and hypermobility, which may be non-specific or syndromic, eg Down or Marfan’s syndromes.

Despite the fact that paediatric flatfoot is a frequent concern [1,20], the evidence for treatment is weak. The lack of definition for ‘flatfoot’ has contributed to varying opinions and a lack of consensus for best practice [21–23]. There is no ‘gold standard’ for categorising foot type, with the margins of flat / rectus / high arch often undefined. Further, few clinical measures are validated in children, hence it is common for clinicians to make diagnostic decisions based on their personal clinical experience of foot types [24]. The availability of normal reference data for paediatric foot posture, based on a valid measure, will provide a ‘benchmark’ for clinical evaluation of this frequent clinical concern. The paediatric flatfoot proforma (p-FFP) has attempted to standardise diagnoses, and direct when intervention is

1  
2  
3 required, using a combination of subjective assessment points and a range of foot posture  
4 measures [17]. However, the extent to which the p-FFP is used by clinicians is unknown and  
5 the proforma does not specify management techniques.  
6  
7  
8  
9

10 Ten years ago the Foot Posture Index (FPI-6) [25] emerged with the objective to standardise  
11 the assessment of foot posture in stance across three discrete foot regions (rearfoot, midfoot,  
12 forefoot) enabling feet to be scored and categorised. Both Evans et al [26] and Gijon-  
13 Nogueron et al [27] have previously utilised the FPI to investigate the paediatric foot. The  
14 FPI is a quick, and easy-to-use clinical tool, not requiring equipment. Scrutiny of the FPI  
15 demonstrates it repeatable and valid [4], with excellent inter-rater reliability in assessment of  
16 the paediatric foot[28]. Recently, the FPI has been identified as a preferred method of  
17 paediatric foot posture measurement in future research[29].  
18  
19  
20  
21  
22  
23  
24  
25

## 26 **Methods**

### 27 **Data acquisition**

28 Data was acquired from multiple sources where the FPI had been assessed in different  
29 children, recruited for screening studies, or acting as comparative controls. Three datasets  
30 were acquired from the authors' previous works (n= 1032, n=1457, n = 728) [19,26,27].  
31 Measurements were taken during 2010 and 2016, some from 10 schools randomly selected  
32 from 25 schools located in the provinces of Málaga, Granada and Plasencia (Spain) (n=2489).  
33 In the UK (n = 225), and Australia (n = 503), two datasets were acquired from the author's  
34 previous works investigating the reliability of clinical assessment measures (n = 170)[10,30],  
35 and further datasets were acquired from other authors in the UK investigating foot posture in  
36 young children (n = 225) [31], and Australia investigating foot posture in young children  
37 with Sever's disease (n = 303)[32], and the control group from an idiopathic toe-walking  
38 study (n = 30)[33]. A total of 3217 observations of the FPI in children aged from three to 15  
39 years were collated.  
40  
41  
42  
43  
44  
45  
46  
47  
48  
49

### 50 **Participants**

51 The inclusion criterion across the studies was for children, of both genders, and aged between  
52 three and 15 years. Exclusion criteria were: foot pain at the time of examination, history of  
53 injury to the lower limbs (eg musculoskeletal injuries during the previous six months),  
54 congenital foot abnormalities, cerebral palsy, motor dysfunction, inflammatory disorders, or  
55 foot surgery. Informed consent had been gained from parents/carers of the children for study  
56 participation. All studies contributing data to the amalgamated dataset were conducted in  
57  
58  
59  
60

1  
2  
3 accordance with the Declaration of Helsinki and was approved by University Human Ethics  
4 Committees in each country (Universities of Malaga CEUMA 91/2016H, Extremadura ID  
5 59/2012, University of Wales Institute, Cardiff and University of South Australia Charles  
6 Sturt University Ethics Committees approval number 10/291 and 89/2012 ).  
7  
8  
9

### 10 **Protocol**

11 Foot posture was assessed with all subjects barefoot, in a relaxed standing position using the  
12 standard protocol for the FPI [34] . The FPI evaluates the multi-segmental nature of foot  
13 posture in all three planes, and does not require the use of specialised equipment. Each item  
14 of the FPI is scored between -2 and +2, with the total six items referring to positions of the  
15 forefoot, midfoot and hindfoot, and the three planes of motion: 1) talar head palpation; 2)  
16 symmetry of supra and infra lateral malleolar curvature; 3) inversion/eversion of the  
17 calcaneus; 4) prominence in the region of the talo-navicular joint; 5) height of the medial  
18 longitudinal arch; 6) abduction/adduction of the forefoot. The FPI score may range from -12  
19 (highly supinated) to +12 (highly pronated). The statistical analysis was independent of the  
20 outcome assessors. The FPI assessors were blinded with the data passed directly to the  
21 database for entry and analyses. Good inter-observer reliability was recorded (ICC 0.852–  
22 0.895) across the studies.  
23  
24  
25  
26  
27  
28  
29  
30  
31

32 The BMI was calculated from the children's height and weight, calculated as,  $BMI =$   
33  $weight(kg)/height(m)^2$ . In Spain, the Orbegozo[35] BMI classification is used; in Australia,  
34 the Australian Health Survey [36]; and in UK the National Child Measurement Programme  
35 [37]. Accordingly, we classified children by their BMI score, using the systems proposed by  
36 Orbegozo, Australian Health Survey, and Public Health England, allocating children to one  
37 of four categories: underweight - percentile less than 3 ( $P < 3$ ), normal weight - percentile  
38 between 3 and 90 ( $P 3-90$ ), overweight - percentile between 90 and 97 ( $P 90-97$ ) and obesity -  
39 percentile greater than 97 ( $P > 97$ ), based on BMI z-score, and age.  
40  
41  
42  
43  
44  
45  
46

### 47 **Patient involvement**

48 No patients were involved in setting the research question or the outcome measures, nor were  
49 they involved in the design or conduct of the study. No patients were asked to advise on  
50 interpretation or writing up of results. There are no plans to disseminate the results of the  
51 research to study participants.  
52  
53  
54

### 55 **Data analysis**

56 Data were entered and all analyses were performed using constructed data sets in SPSS  
57 version 24 (SPSS Inc, Chicago, Illinois) software packages. The data from the contributing  
58  
59  
60

1  
2  
3 studies were collated in a separate database, with statistical analysis performed by an external  
4 person, previously blind to the results.

5  
6 Testing for normality using a Kolmogorov–Smirnov test, found non-normal distribution of all  
7 data, indicating suitability for non-parametric analysis (Mann–Whitney U and Kruskal–  
8 Wallis). Descriptive statistics (mean, standard deviation, minimum, maximum, frequencies)  
9 were used to examine the basic anthropometrical characteristics of the study populations. The  
10 FPI was analysed as continuous data, rather than as z-score data, and analysis of variance was  
11 conducted to determine the association between the different BMI groups (underweight,  
12 normal, overweight and obesity), gender, age, and the FPI. To preserve the independence of  
13 data[38], and based on the strong correlation between FPI scores for left and right feet [39],  
14 only the left foot (chosen at random) was used in the statistical analyses, applying the Games-  
15 Howell post hoc correction to identify significant differences. With reference to the available  
16 normative data [25], three FPI-6 scores levels were used to ‘define and explore’ the range  
17 supinated (-12 to -1), neutral (0 to +5), pronated (+6 to +8), and overpronated (+9 to +12).  
18 The significance level was set at  $p < 0.05$ , and all the analyses and tests were two-sided  
19  
20  
21  
22  
23  
24  
25  
26  
27  
28  
29  
30

## 31 **Results**

32 The mean age of the study population of 3217 children was 8.67 years (SD 2.02), ranging  
33 from three years to 15 years. The mean BMI was 19.08 kg/m<sup>2</sup> (SD 4.05), ranging from 10.57  
34 kg/m<sup>2</sup> to 39.14 kg/m<sup>2</sup>. The mean FPI score was 4.11 (SD 2.92) and 4.20 (3.00) for left and  
35 right feet respectively, with whole scores ranging from -4 to +12 (left and right) (Figure 1,  
36 FPI right feet). The total study population gender distribution was 1699 male, 1518 female  
37 (Table 1).  
38  
39  
40  
41  
42  
43  
44

45 In the study population of 3217 children, flatfeet or pronated (FPI  $\geq +6$ ) were found in 960  
46 (29.8%) children and normal (FPI  $< +6$ ) in 1776 (55.2%) children, FPI  $\geq +10$  yielded flatfeet  
47 in 127 (3.9%) cases and supinated foot were found in 354 (11%) children. Table 2 used  
48 designated FPI categories to define and explore the range of foot posture across childhood.  
49  
50  
51  
52

53 There was strong correlation between FPI scores on left and right sides ( $r = 0.9014$ ,  $p < 0.01$ ),  
54 from which the left side was arbitrarily used for subsequent analyses. Similarly, we found  
55 little gender bias, with the mean FPI for males 4.2 (2.9), range -4 to +12, and for females,  
56 mean FPI 3.99 (2.9), range -4 to +12 (Figure 2). The correlation between FPI and gender  
57  
58  
59  
60



1  
2  
3 used z-score was very weak, if significant ( $F=4.073$ ,  $p=0.04$ ). Between countries there was  
4 significant difference ( $p<0.01$ ), with Spanish children's mean FPI = 4.00(2.9), the UK mean  
5 FPI = 4.9(3.3), and the Australian children's mean FPI = 4.7(3.1).  
6  
7  
8  
9

10 The general trend showed FPI scores declining with age, which supports the clinical  
11 observation of less flatfoot in older children. The frequency of FPI scores for each year of age  
12 show that the maximum FPI score = +6, in 15.2% of children (Table 3).  
13

14 Clinical alert is indicated for foot posture  $> \pm 2SD$ , representing 5% of expected  
15 abnormality. Table 4 shows the standard deviation of the mean FPI scores, and enables the  
16 mean FPI and one and two standard deviations above and below to be referenced as normally  
17 expected for each year of age. Figure 3 displays and explores the relationship between foot  
18 posture and age across childhood for the study population, using error bars for average z-  
19 scores (95% confidence intervals).  
20  
21  
22  
23  
24  
25

26 Significant correlation was found between BMI and age ( $r = 0.276$ ,  $p < 0.01$ ). The correlation  
27 between BMI and FPI, whilst also statistically significant, was very weak and also inverse ( $r$   
28 =  $-0.066$ ,  $p < 0.01$ ), refuting the strength of relationship between body mass and foot posture.  
29 BMI cut-points and percentiles were used to define underweight, normal weight, overweight,  
30 and obese. Within the total 3217 children, 142 (4.4%) were underweight, 2407 (74.8%) were  
31 normal weight, 469 (16.1%) were overweight, and 199 (6.2%) were obese (Figure 4).  
32 Combining categories, 668 (20.8%) of all children were overweight or obese.  
33  
34  
35  
36  
37  
38  
39

40 The foot posture categories were analysed for distribution across the BMI categories (Table  
41 5). The largest overlap of FPI and BMI categories were: normal weight / normal FPI range,  
42  $n= 1325$  (41.2%); normal weight / pronated foot posture,  $n= 728$  (22.6%); overweight or  
43 obese / normal foot posture,  $n=383$ (11.9%). Supinated feet across all BMI categories returned  
44  $n=354$ (11.0%). Exploring the association between the pronated foot and BMI across FPI  
45 ranges showed that 960(29.8%) children had foot posture that was pronated, FPI  $> 6$ . Of  
46 these, 44 (4.5%) were underweight, 728 (75.8%) were normal weight, 188 were overweight,  
47 or obese (19.5%). Further, 127 children had highly pronated foot posture, FPI  $> 10$ . Of these,  
48 12 (9.4%) were underweight, 94 (74.0%) were normal weight, and 21 (16.5%) were  
49 overweight or obese.  
50  
51  
52  
53  
54  
55  
56  
57  
58  
59  
60

## Discussion

This study is the largest investigation to explore paediatric foot posture using the FPI, paediatric anthropometry using BMI, and to analyse the regularly cited influence of increased body weight as a potentiating factor for flatfeet across childhood. This investigation of paediatric foot posture includes children aged from three to 15 years, superseding previous, smaller or age-limited, studies[26,27].

This study confirms the pronated foot as the common foot posture of childhood, with mean FPI of +4, and 3-point standard deviation, such that average normal FPI range for children aged three to 15 years was between the FPI range +1 to +7 (mean +/- SD). We found that the mean FPI scores reduced with age, in non-linear pattern, and within a wide range. The standard deviation approximated 75% of the FPI mean at every age, confirming the considerable and normal variation in foot posture across childhood.

The greatest number of children across all ages displayed FPI within the 0 to +5 FPI range, ie normal foot posture. Next common were children with pronated feet. The least common FPI categories were either supinated or highly pronated, indicative of the foot types that should arrest the attention of clinicians, as less usual presentations. Flatfoot or pronated foot posture was generally found to decline with age, but mean reduction was non-linear and modest, from +6 at age three years, to +3 at 14 years. Importantly, the normal FPI range of variation was broad: -1 to +11 at age three years, and FPI +3 to +9 at age 14 years.

The relationship between increased BMI and flatfeet is again refuted by the findings of this study which found that only 16.5% of the children with highly pronated feet, were also overweight or obese. Our results contrasted with many older studies which asserted that heavier, fatter children have flatter feet. Importantly, the previous studies all assessed foot posture using a footprint based method of foot posture assessment [5,40,41], a method which may well represent adipose tissue spread with weight bearing, rather than anatomical foot morphology, more directly evaluated using the FPI [25,26,42]. Whilst it is concerning to find that 21% of the children in this study were overweight or obese, association with flatfeet is not found.

The availability of average FPI whole scores, enables clinicians to inform parents as to what is 'average' and what is 'normal' at any age, as statistically defined. The availability of FPI scores within one standard deviation above and below the mean, enables clinicians to confirm

1  
2  
3 for parents that their child approximates with two-thirds, or 68%, of children for a specific  
4 age. Further, FPI scores within two standard deviations above and below the mean, enable  
5 clinicians to inform parents that their child is within the normal 95% range, approximating  
6 one-quarter, or 27%, of same age children. Such reference data helps appreciation of the  
7 range of 'normal range' for foot posture, similarly to that for the onset of independent  
8 walking (age range of 10 to 16 months, mean age approximating 12 to 13 months)[18].  
9

10  
11  
12  
13  
14  
15 The focus of this investigation has been to better elucidate the normal range of foot posture  
16 across childhood, as is commonly assessed by many clinicians using the FPI. Simultaneously,  
17 the authors aimed to provide clinicians with a robust reference guide of normal values within  
18 statistical bounds. The culmination of this aim is provided as a reference Table (Table 4). The  
19 scale of this investigation renders its findings stronger than those of the 1000 Norms protocol  
20 for most age (year) groups, as the comparative number of participants reveals. The 1000  
21 Norms protocol will include: ages 3 to 9 years, 140 (20 per age year); ages 10 to 19 years,  
22 160 (16 per age year)[43]. By comparison, this study informs for: ages 3 to 9 years, 2796 (20  
23 to 764 per age year); ages 10 to 15 years, 1304 (1 to 634 per age year).  
24  
25  
26  
27  
28  
29  
30  
31

32  
33 Clinicians must move beyond flatfoot posture appearance as an indicator for intervention, and  
34 instead appreciate the range of normal variation, and only respond to more pertinent factors  
35 as outlined by the 3QQ (3 Quick Questions) screening tool (addressing pain presentations,  
36 left versus right limb symmetry, paediatric age range)[20]. Clinicians need to appreciate the  
37 normal range of many developmental features, yet simultaneously be alert to the level at  
38 which clinical concern should be raised. The tabulated reference guide provided from this  
39 study, will be of immediate clinical relevance.  
40  
41  
42  
43  
44  
45

46  
47 The striking finding of this study is not that paediatric flexible flatfoot is largely normal, it is  
48 that the supinated paediatric foot is far more likely to be abnormal, especially at age three and  
49 four years. An FPI of -2 or less, must be considered 'abnormal' until shown otherwise, as it is  
50 outside normal range at any age, and should prompt neurological assessment.  
51  
52  
53  
54

55  
56 Limitations of this investigation include the cross-sectional nature of the design and the  
57 ethnicity of participants (largely Caucasian). Further, the sample does not evenly represent  
58 children from each country, nor each year of age, hence caution is indicated for ages three to  
59 seven years and 14 to 15 years where sampling was least. In addition, consideration that this  
60

1  
2  
3 study is a collation of smaller discrete studies, and should be consider measurement errors,  
4 although all followed the same protocol [3]. Prospective data avails stronger evidence of foot  
5 posture change over time [4].  
6  
7  
8  
9

## 10 **Conclusions**

11 This is the largest study of paediatric foot posture to date. Importantly, the main finding is to  
12 denounce the paediatric flatfoot as deviant. This study confirms that the ‘flat’ or pronated  
13 foot is the common foot posture of childhood, with FPI score of +4(3) the average finding. A  
14 wide normal range of foot posture across childhood is confirmed (16 FPI points, ie -2 to  
15 +12).  
16  
17  
18  
19

20 The reference data produced from the findings of this study will assist clinicians in  
21 standardised decision-making.  
22  
23

24 Increased paediatric BMI was not associated with flatter feet, questioning the validity of  
25 footprint-derived measures.  
26  
27  
28

## 29 **References**

- 30 1 Carli A, Saran N, Kruijt J, *et al.* Physiological referrals for paediatric musculoskeletal  
31 complaints: A costly problem that needs to be addressed. *Paediatr Child Heal*  
32 2012;**17**.
- 33 2 Pfeiffer M, Kotz R, Ledl T, *et al.* Prevalence of flat foot in preschool-aged children.  
34 *Pediatrics* 2006;**118**:634–9. doi:10.1542/peds.2005-2126
- 35 3 Drefus L, PT DPT, Kedem P, *et al.* Reliability of the Arch Height Index as a Measure  
36 of Foot Structure in Children. *Pediatr Phys Ther* 2017;**29**:83–8.  
37 doi:10.1097/PEP.0000000000000337
- 38 4 Redmond AC, Crosbie J, Ouvrier RA. Development and validation of a novel rating  
39 system for scoring standing foot posture: The Foot Posture Index. *Clin Biomech*  
40 2006;**21**:89–98. doi:10.1016/j.clinbiomech.2005.08.002
- 41 5 Chen KC, Yeh CJ, Kuo JF, *et al.* Footprint analysis of flatfoot in preschool-aged  
42 children. *Eur J Pediatr* 2011;**170**:611–7. doi:10.1007/s00431-010-1330-4
- 43 6 Chang CH, Chen YC, Yang WT, *et al.* Flatfoot diagnosis by a unique bimodal  
44 distribution of footprint index in children. *PLoS One* 2014;**9**.  
45 doi:10.1371/journal.pone.0115808
- 46 7 Nemeth B. The diagnosis and management of common childhood orthopedic  
47 disorders. *Curr Probl Pediatr Adolesc Health Care* 2011;**41**:2–28.  
48 doi:10.1016/j.cppeds.2010.10.004
- 49 8 Uden H, Scharfbillig R, Causby R. The typically developing paediatric foot: How flat  
50 should it be? A systematic review. *J. Foot Ankle Res.* 2017;**10**. doi:10.1186/s13047-  
51  
52  
53  
54  
55  
56  
57  
58  
59  
60

- 017-0218-1
- 9 Sadeghi-Demneh E, Azadinia F, Jafarian F, *et al.* Flatfoot and obesity in school-age children: a cross-sectional study. *Clin Obes* 2016;**6**:42–50. doi:10.1111/cob.12125
  - 10 Evans AM, Rome K, Peet L. The foot posture index, ankle lunge test, Beighton scale and the lower limb assessment score in healthy children: A reliability study. *J Foot Ankle Res* 2012;**5**. doi:10.1186/1757-1146-5-1
  - 11 Martínez-Nova A, Gijón-Noguerón G, Alfageme-García P, *et al.* Foot posture development in children aged 5 to 11 years: A three-year prospective study. *Gait Posture* 2018;**62**. doi:10.1016/j.gaitpost.2018.03.032
  - 12 Mickle KJ, Steele JR, Munro BJ. Is the foot structure of preschool children moderated by gender? *J Pediatr Orthop* 2008;**28**:593–6. doi:10.1097/BPO.0b013e318173f782
  - 13 Stolzman S, Irby MB, Callahan AB, *et al.* Pes planus and paediatric obesity: a systematic review of the literature. *Clin. Obes.* 2015;**5**:52–9. doi:10.1111/cob.12091
  - 14 Kothari A, Dixon PC, Stebbins J, *et al.* The relationship between quality of life and foot function in children with flexible flatfeet. *Gait Posture* 2015;**41**:786–90. doi:10.1016/j.gaitpost.2015.02.012
  - 15 Lin CJ, Lai KA, Kuan TS, *et al.* Correlating factors and clinical significance of flexible flatfoot in preschool children. *J Pediatr Orthop* 2001;**21**:378–82. doi:10.1097/01241398-200105000-00022
  - 16 Labovitz JM. The algorithmic approach to pediatric flexible pes planovalgus. *Clin Podiatr Med Surg* 2006;**23**:57–76. doi:10.1016/j.cpm.2005.10.001
  - 17 Evans AM. The flat-footed child -- to treat or not to treat: what is the clinician to do? *J Am Podiatr Med Assoc* 2008;**98**:386–93. doi:10.7547/0980386
  - 18 Evans A. *Pocket Podiatry: Paediatrics*. 2010. doi:10.1016/B978-0-7020-3031-4.00017-1
  - 19 Gijon-nogueron G, Sanchez-rodriguez R, Lopezosa-reca E, *et al.* Normal Values of the Foot Posture Index in a Young Adult Spanish Population. *J Am Pod Med Assoc* 2015;**105**:42–6. doi:10.7547/8750-7315-105.1.42
  - 20 Evans AM. Mitigating clinician and community concerns about children's flatfeet, intoeing gait, knock knees or bow legs. *J. Paediatr. Child Health.* 2017;**53**:1050–3. doi:10.1111/jpc.13761
  - 21 Evans AM, Rome K. A cochrane review of the evidence for non-surgical interventions for flexible pediatric flat feet. *Eur. J. Phys. Rehabil. Med.* 2011;**47**:69–89. doi:10.1002/14651858
  - 22 Rome K, Ashford RL, Evans A. Non-surgical interventions for paediatric pes planus. *Cochrane Database Syst. Rev.* 2007. doi:10.1002/14651858.CD006311
  - 23 Kane K. Foot orthoses for pediatric flexible flatfoot: evidence and current practices

- 1  
2  
3 among canadian physical therapists. *Pediatr Phys Ther* 2015;**27**:53–9.  
4 doi:10.1097/PEP.0000000000000106  
5
- 6  
7 24 Harris EJ. The Natural History and Pathophysiology of Flexible Flatfoot. *Clin. Podiatr.*  
8 *Med. Surg.* 2010;**27**:1–23. doi:10.1016/j.cpm.2009.09.002  
9
- 10 25 Redmond AC, Crane YZ, Menz HB. Normative values for the Foot Posture Index. *J*  
11 *Foot Ankle Res* 2008;**1**:6. doi:10.1186/1757-1146-1-6  
12
- 13 26 Evans AM, Karimi L. The relationship between paediatric foot posture and body mass  
14 index: do heavier children really have flatter feet? *J Foot Ankle Res* 2015;**8**:46.  
15 doi:10.1186/s13047-015-0101-x  
16
- 17 27 Gijon-Nogueron G, Montes-Alguacil J, Alfigeme-Garcia P, *et al.* Establishing  
18 normative foot posture index values for the paediatric population: a cross-sectional  
19 study. *J Foot Ankle Res* 2016;**9**:24. doi:10.1186/s13047-016-0156-3  
20
- 21 28 Morrison SC, Ferrari J. Inter-rater reliability of the Foot Posture Index (FPI-6) in the  
22 assessment of the paediatric foot. *J Foot Ankle Res* 2009;**2**. doi:10.1186/1757-1146-2-  
23 26  
24
- 25 29 Banwell HA, Paris ME, Mackintosh S, *et al.* Paediatric flexible flat foot: How are we  
26 measuring it and are we getting it right? A systematic review. *J. Foot Ankle Res.*  
27 2018;**11**. doi:10.1186/s13047-018-0264-3  
28
- 29 30 Evans AM. The paediatric flat foot and general anthropometry in 140 Australian  
30 school children aged 7 - 10 years. *J Foot Ankle Res* 2011;**4**. doi:10.1186/1757-1146-4-  
31 12  
32
- 33 31 Targett R, Mathieson I. Evaluation of foot posture development in children between  
34 three and eleven years of age using the foot posture index. *J Foot Ankle Res*  
35 2010;**3**:P17. doi:10.1186/1757-1146-3-S1-P17  
36
- 37 32 Scharfbillig RW, Jones S, Scutter S. Sever's disease-Does it effect quality of life? *Foot*  
38 2009;**19**:36–43. doi:10.1016/j.foot.2008.07.004  
39
- 40 33 Williams CM, Tinley P, Curtin M, *et al.* Hand preference in children with an  
41 idiopathic toe walking gait. *Acta Paediatr Int J Paediatr* 2012;**101**.  
42 doi:10.1111/j.1651-2227.2011.02512.x  
43
- 44 34 Keenan A-M, Redmond AC, Horton M, *et al.* The Foot Posture Index: Rasch analysis  
45 of a novel, foot-specific outcome measure. *Arch Phys Med Rehabil* 2007;**88**:88–93.  
46 doi:10.1016/j.apmr.2006.10.005  
47
- 48 35 Sobradillo B, Aguirre A, Aresti U, Bilbao C F-RC, Lizárraga A *et al.* Curvas y tablas  
49 de crecimiento (estudio longitudinal y transversal). *Fund. Faustino Orbeagozo*  
50 Eizaguirre. 2004.[http://www.aepap.org/pdf/f\\_orbeagozo\\_04.pdf](http://www.aepap.org/pdf/f_orbeagozo_04.pdf)  
51
- 52 36 Australian Bureau of Statistics. Australian Health Survey: First Results, 2011-12. *CAT*  
53 *no 4364055003* 2012;:1–61. doi:ABS cat. no. 4364.0.55.003  
54
- 55 37 Noo, Ncmp. National Child Measurement Programme. Changes in children ' s body  
56  
57  
58  
59  
60

- 1  
2  
3 mass index. 2013;:1–  
4 36.[http://www.noo.org.uk/uploads/doc/vid\\_17929\\_NCMP\\_Changes\\_children.pdf](http://www.noo.org.uk/uploads/doc/vid_17929_NCMP_Changes_children.pdf)  
5  
6  
7 38 Redmond AC, Crane YZ, Menz HB. Normative values for the Foot Posture Index. *J*  
8 *Foot Ankle Res* 2008;**1**:6. doi:10.1186/1757-1146-1-6  
9  
10 39 Menz HB. Analysis of paired data in physical therapy research: time to stop double-  
11 dipping? *J Orthop Sports Phys Ther* 2005;**35**:477–8. doi:10.2519/jospt.2005.0108  
12  
13 40 Mickle KJ, Steele JR, Munro BJ. The feet of overweight and obese young children: are  
14 they flat or fat? *Obesity (Silver Spring)* 2006;**14**:1949–53. doi:10.1038/oby.2006.227  
15  
16 41 Villarroya MA, Esquivel JM, Tomás C, *et al.* Assessment of the medial longitudinal  
17 arch in children and adolescents with obesity: Footprints and radiographic study. *Eur J*  
18 *Pediatr* 2009;**168**. doi:10.1007/s00431-008-0789-8  
19  
20 42 Gijon-Nogueron G, Montes-Alguacil J, Martinez-Nova A, *et al.* Overweight, obesity  
21 and foot posture in children: A cross-sectional study. *J. Paediatr. Child Health.* 2016.  
22 doi:10.1111/jpc.13314  
23  
24 43 McKay MJ, Baldwin JN, Ferreira P, *et al.* 1000 Norms Project: Protocol of a cross-  
25 sectional study cataloging human variation. *Physiother (United Kingdom)*  
26 2016;**102**:50–6. doi:10.1016/j.physio.2014.12.002  
27  
28  
29  
30  
31  
32  
33  
34  
35  
36  
37  
38  
39  
40  
41  
42  
43  
44  
45  
46  
47  
48  
49  
50  
51  
52  
53  
54  
55  
56  
57  
58  
59  
60

1  
2  
3 **Legend text**  
4

5 Figure 1 Frequency plot of FPI values (n=3217)  
6

7 Figure 2 FPI frequency plot for gender  
8

9 Figure 3 Simple error bars display the relationship between FPI and age.  
10  
11

12 Figure 4 Frequency plot of BMI category versus FPI category  
13  
14  
15  
16  
17  
18  
19  
20  
21  
22  
23  
24  
25  
26  
27  
28  
29  
30  
31  
32  
33  
34  
35  
36  
37  
38  
39  
40  
41  
42  
43  
44  
45  
46  
47  
48  
49  
50  
51  
52  
53  
54  
55  
56  
57  
58  
59  
60

For peer review only



Table 1

Descriptive statistics for the amalgamated data sets. Due to variation between the constituent datasets, main results emerged from the variables of age, BMI, FPI Left. Gender ratio was 1699 males: 1518 females.

| Variable                 | N    | Range | Minimum | Maximum | Mean  | SD   |
|--------------------------|------|-------|---------|---------|-------|------|
| Age (years)              | 3217 | 12    | 3       | 15      | 8.67  | 2.02 |
| BMI (kg/m <sup>2</sup> ) | 3217 | 28.57 | 10.57   | 39.14   | 19.08 | 4.05 |
| FPI Right                | 3217 | 16    | -4      | 12      | 4.20  | 3.00 |
| FPI Left                 | 3217 | 16    | -4      | 12      | 4.11  | 2.92 |

1  
2  
3  
4  
5  
6  
7  
8  
9  
10  
11  
12  
13  
14  
15  
16  
17  
18  
19  
20  
21  
22  
23  
24  
25  
26  
27  
28  
29  
30  
31  
32  
33  
34  
35  
36  
37  
38  
39  
40  
41  
42  
43  
44  
45  
46

Table 2

The FPI range which refer to foot posture categories. were collated for each year of age. The median FPI total score across the study population was 4(3) points. with the trend of reduced FPI with increased age confirmed.

| Age (yrs) | No. /Age | FPI-6 total score – <i>Foot posture category cut-offs</i> |             |             |               |          |      |       |
|-----------|----------|-----------------------------------------------------------|-------------|-------------|---------------|----------|------|-------|
|           |          | Supinated                                                 | Normal      | Pronated    | High pronated | Mean FPI | SD   | Range |
| 3         | 21       | 2                                                         | 4           | 14          | 1             | 6.38     | 3.03 | 11    |
| 4         | 20       | 1                                                         | 5           | 12          | 2             | 6.7      | 2.60 | 11    |
| 5         | 55       | 5                                                         | 34          | 13          | 3             | 4.15     | 2.81 | 12    |
| 6         | 388      | 29                                                        | 213         | 132         | 14            | 4.45     | 2.80 | 15    |
| 7         | 536      | 51                                                        | 296         | 164         | 25            | 4.3      | 2.93 | 16    |
| 8         | 473      | 48                                                        | 271         | 131         | 23            | 4.01     | 2.95 | 16    |
| 9         | 625      | 74                                                        | 362         | 175         | 14            | 3.82     | 2.77 | 16    |
| 10        | 497      | 62                                                        | 291         | 123         | 21            | 3.69     | 2.86 | 15    |
| 11        | 377      | 50                                                        | 194         | 119         | 14            | 4.24     | 3.02 | 16    |
| 12        | 144      | 24                                                        | 65          | 48          | 7             | 4.22     | 3.23 | 14    |
| 13        | 33       | 1                                                         | 17          | 12          | 3             | 5.18     | 2.98 | 10    |
| 14        | 22       | 4                                                         | 12          | 6           | 0             | 3.14     | 3.40 | 12    |
| 15        | 26       | 3                                                         | 12          | 11          | 0             | 4.19     | 3.31 | 12    |
| Total     | 3217     | 354(11%)                                                  | 1776(55.2%) | 960(29.84%) | 127(3.95%)    | 4.2      | 3    | 16    |

Table 3

FPI total scores versus age year groups.

| FPI/<br>age   | -4  | -3  | -2  | -1  | 0   | 1   | 2    | 3    | 4    | 5   | 6    | 7   | 8   | 9   | 10  | 11  | 12  | Total / n |
|---------------|-----|-----|-----|-----|-----|-----|------|------|------|-----|------|-----|-----|-----|-----|-----|-----|-----------|
| 3             | 0   | 0   | 0   | 1   | 1   | 0   | 0    | 1    | 2    | 1   | 2    | 0   | 3   | 4   | 4   | 0   | 2   | 21        |
| 4             | 0   | 0   | 0   | 0   | 1   | 0   | 0    | 0    | 3    | 3   | 5    | 2   | 2   | 1   | 1   | 2   | 0   | 20        |
| 5             | 0   | 0   | 1   | 0   | 6   | 3   | 7    | 11   | 7    | 3   | 6    | 2   | 2   | 1   | 1   | 4   | 1   | 55        |
| 6             | 0   | 1   | 3   | 6   | 24  | 31  | 45   | 46   | 47   | 38  | 69   | 30  | 19  | 11  | 6   | 8   | 4   | 388       |
| 7             | 1   | 6   | 4   | 3   | 39  | 43  | 48   | 72   | 69   | 55  | 90   | 33  | 22  | 27  | 14  | 7   | 3   | 536       |
| 8             | 1   | 2   | 1   | 8   | 36  | 47  | 55   | 45   | 49   | 48  | 89   | 27  | 24  | 17  | 13  | 7   | 4   | 473       |
| 9             | 3   | 3   | 5   | 11  | 55  | 61  | 60   | 72   | 81   | 78  | 92   | 48  | 21  | 14  | 9   | 8   | 4   | 625       |
| 10            | 0   | 5   | 3   | 14  | 41  | 59  | 68   | 71   | 54   | 39  | 61   | 23  | 17  | 12  | 17  | 9   | 4   | 497       |
| 11            | 1   | 3   | 4   | 10  | 29  | 22  | 31   | 48   | 58   | 32  | 52   | 29  | 26  | 14  | 10  | 3   | 5   | 377       |
| 12            | 0   | 2   | 2   | 6   | 17  | 9   | 12   | 7    | 19   | 11  | 19   | 14  | 12  | 6   | 5   | 3   | 0   | 144       |
| 13            | 0   | 0   | 0   | 0   | 1   | 2   | 1    | 6    | 2    | 5   | 2    | 7   | 2   | 2   | 3   | 0   | 0   | 33        |
| 14            | 0   | 1   | 2   | 0   | 1   | 3   | 2    | 3    | 4    | 0   | 1    | 2   | 0   | 2   | 1   | 0   | 0   | 22        |
| 15            | 0   | 1   | 2   | 0   | 0   | 1   | 3    | 4    | 3    | 2   | 2    | 3   | 0   | 3   | 2   | 0   | 0   | 26        |
| Total/<br>FPI | 6   | 24  | 27  | 59  | 251 | 281 | 332  | 386  | 398  | 315 | 490  | 220 | 150 | 114 | 86  | 51  | 27  | 3217      |
| %             | 0.2 | 0.7 | 0.8 | 1.8 | 7.8 | 8.7 | 10.3 | 12.0 | 12.4 | 9.8 | 15.2 | 6.8 | 4.7 | 3.5 | 2.7 | 1.6 | 0.8 | 100       |

%: Percentage, SD: Standard Deviation, R: Range  
 31  
 32  
 33  
 34  
 35  
 36  
 37  
 38  
 39  
 40  
 41  
 42  
 43  
 44  
 45  
 46

Table 4  
FPI total scores versus age year groups, **showing normal range, and FPI outside normal range.**

| Age | -2SD  | -1SD  | Mean        | +1SD  | +2SD  | Sample size | SD  | FPI Median (+/- 1SD) | FPI Median (+/- 2SD) | Clinical Alert FPI > +/-2SD |
|-----|-------|-------|-------------|-------|-------|-------------|-----|----------------------|----------------------|-----------------------------|
| 3   | 0.02  | 3.60  | <b>7.19</b> | 10.78 | 12.78 | 21          | 3.6 | 8 (4 – 12)           | 8 (0 – 12)           | < <b>0</b> or > <b>12</b>   |
| 4   | 1.11  | 3.76  | <b>6.40</b> | 9.04  | 11.79 | 20          | 2.6 | 6 (3 – 9)            | 6 (0 – 12)           | < <b>0</b> or > <b>12</b>   |
| 5   | -2.41 | 0.91  | <b>4.22</b> | 7.54  | 10.68 | 55          | 3.3 | 3 (0 – 6)            | 3 (-3 – 9)           | < <b>-3</b> or > <b>9</b>   |
| 6   | -1.37 | 1.50  | <b>4.36</b> | 7.22  | 10.71 | 388         | 2.9 | 4 (1 – 7)            | 4 (-2 – 10)          | < <b>-2</b> or > <b>10</b>  |
| 7   | -1.53 | 1.40  | <b>4.32</b> | 7.24  | 10.67 | 536         | 2.9 | 4 (1 – 7)            | 4 (-2 – 10)          | < <b>-2</b> or > <b>10</b>  |
| 8   | -1.64 | 1.33  | <b>4.29</b> | 7.25  | 10.15 | 473         | 2.9 | 4 (1 – 7)            | 4 (-1 – 10)          | < <b>-1</b> or > <b>10</b>  |
| 9   | -1.74 | 1.11  | <b>3.96</b> | 6.81  | 9.83  | 625         | 2.8 | 4 (1 – 7)            | 4 (-1 – 10)          | < <b>-1</b> or > <b>10</b>  |
| 10  | -2.31 | 0.73  | <b>3.77</b> | 6.81  | 9.92  | 497         | 3.0 | 3 (0 – 6)            | 4 (-3 – 9)           | < <b>-3</b> or > <b>9</b>   |
| 11  | -1.77 | 1.28  | <b>4.33</b> | 7.38  | 10.20 | 377         | 3.0 | 4 (1 – 7)            | 4 (-2 – 10)          | < <b>-2</b> or > <b>10</b>  |
| 12  | -2.43 | 0.92  | <b>4.26</b> | 7.61  | 10.73 | 144         | 3.3 | 4 (1 – 7)            | 4 (-2 – 10)          | < <b>-2</b> or > <b>10</b>  |
| 13  | -0.03 | 2.71  | <b>5.45</b> | 8.19  | 11.18 | 33          | 2.7 | 5 (2 – 8)            | 5 (-1 – 11)          | < <b>-1</b> or > <b>11</b>  |
| 14  | -3.89 | -0.28 | <b>3.32</b> | 6.92  | 9.92  | 22          | 3.6 | 4 (1 – 7)            | 4 (-2 – 9)           | < <b>-2</b> or > <b>9</b>   |
| 15  | -2.84 | 0.77  | <b>4.38</b> | 7.99  | 11.18 | 26          | 3.6 | 4 (0 – 8)            | 4 (-4 – 12)          | < <b>-4</b> or > <b>12</b>  |

**Table 5**

FPI and BMI category distributions, showing greatest concordance between normal FPI and normal BMI.

|                 |                | Underweight     | Normal            | Overweight or Obese | Total |
|-----------------|----------------|-----------------|-------------------|---------------------|-------|
| Supinated       | Count          | 18 <sup>a</sup> | 260 <sup>a</sup>  | 76 <sup>a</sup>     | 354   |
|                 | Expected count | 15.6            | 264.9             | 73.5                | 354   |
| Normal          | Count          | 68 <sup>a</sup> | 1325 <sup>a</sup> | 383 <sup>a</sup>    | 1776  |
|                 | Expected count | 78.4            | 1328.8            | 368.8               | 1776  |
| Pronated        | Count          | 44 <sup>a</sup> | 728 <sup>a</sup>  | 188 <sup>a</sup>    | 960   |
|                 | Expected count | 42.4            | 718.3             | 199.3               | 960   |
| Highly Pronated | Count          | 12 <sup>a</sup> | 94 <sup>b</sup>   | 21 <sup>b</sup>     | 127   |
|                 | Expected count | 5.6             | 95                | 26.4                | 127   |
| Total           | Count          | 142             | 2407              | 668                 | 3217  |

Note: superscript letters denote a subset of FPI (Left) categories whose column proportions did not differ significantly from each other at the level of 0.05.

1  
2  
3  
4  
5  
6  
7  
8  
9  
10  
11  
12  
13  
14  
15  
16  
17  
18  
19  
20  
21  
22  
23  
24  
25  
26  
27  
28  
29  
30  
31  
32  
33  
34  
35  
36  
37  
38  
39  
40  
41  
42  
43  
44  
45  
46  
47  
48  
49  
50  
51  
52  
53  
54  
55  
56  
57  
58  
59  
60



Figure 1 Frequency plot of FPI values (n=3217)  
188x157mm (300 x 300 DPI)



Figure 2 FPI frequency plot for gender

260x151mm (300 x 300 DPI)

1  
2  
3  
4  
5  
6  
7  
8  
9  
10  
11  
12  
13  
14  
15  
16  
17  
18  
19  
20  
21  
22  
23  
24  
25  
26  
27  
28  
29  
30  
31  
32  
33  
34  
35  
36  
37  
38  
39  
40  
41  
42  
43  
44  
45  
46  
47  
48  
49  
50  
51  
52  
53  
54  
55  
56  
57  
58  
59  
60



Figure 3 Simple error bars display the relationship between FPI and age.

99x58mm (300 x 300 DPI)



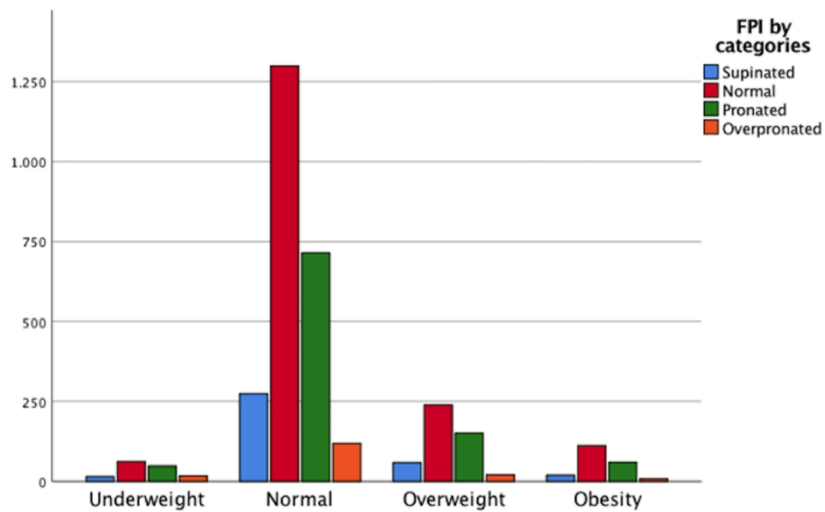

Figure 4 Frequency plot of BMI category versus FPI category

89x67mm (600 x 600 DPI)

## STROBE Statement—checklist of items that should be included in reports of observational studies

|                              | Item No | Recommendation                                                                                                                                                                             | Page |
|------------------------------|---------|--------------------------------------------------------------------------------------------------------------------------------------------------------------------------------------------|------|
| <b>Title and abstract</b>    | 1       | (a) Indicate the study's design with a commonly used term in the title or the abstract                                                                                                     | 1-2  |
|                              |         | (b) Provide in the abstract an informative and balanced summary of what was done and what was found                                                                                        |      |
| <b>Introduction</b>          |         |                                                                                                                                                                                            |      |
| Background/rationale         | 2       | Explain the scientific background and rationale for the investigation being reported                                                                                                       | 4    |
| Objectives                   | 3       | State specific objectives, including any prespecified hypotheses                                                                                                                           | 4    |
| <b>Methods</b>               |         |                                                                                                                                                                                            |      |
| Study design                 | 4       | Present key elements of study design early in the paper                                                                                                                                    | 5    |
| Setting                      | 5       | Describe the setting, locations, and relevant dates, including periods of recruitment, exposure, follow-up, and data collection                                                            | 5    |
| Participants                 | 6       | (a) <i>Cohort study</i> —Give the eligibility criteria, and the sources and methods of selection of participants. Describe methods of follow-up                                            | 5    |
|                              |         | <i>Case-control study</i> —Give the eligibility criteria, and the sources and methods of case ascertainment and control selection. Give the rationale for the choice of cases and controls |      |
|                              |         | <i>Cross-sectional study</i> —Give the eligibility criteria, and the sources and methods of selection of participants                                                                      |      |
|                              |         | (b) <i>Cohort study</i> —For matched studies, give matching criteria and number of exposed and unexposed                                                                                   |      |
|                              |         | <i>Case-control study</i> —For matched studies, give matching criteria and the number of controls per case                                                                                 |      |
| Variables                    | 7       | Clearly define all outcomes, exposures, predictors, potential confounders, and effect modifiers. Give diagnostic criteria, if applicable                                                   | 5    |
| Data sources/<br>measurement | 8*      | For each variable of interest, give sources of data and details of methods of assessment (measurement). Describe comparability of assessment methods if there is more than one group       | 5    |
| Bias                         | 9       | Describe any efforts to address potential sources of bias                                                                                                                                  | -    |
| Study size                   | 10      | Explain how the study size was arrived at                                                                                                                                                  | 5    |
| Quantitative variables       | 11      | Explain how quantitative variables were handled in the analyses. If applicable, describe which groupings were chosen and why                                                               | 6    |
| Statistical methods          | 12      | (a) Describe all statistical methods, including those used to control for confounding                                                                                                      | 6    |
|                              |         | (b) Describe any methods used to examine subgroups and interactions                                                                                                                        | 6    |
|                              |         | (c) Explain how missing data were addressed                                                                                                                                                | -    |
|                              |         | (d) <i>Cohort study</i> —If applicable, explain how loss to follow-up was addressed                                                                                                        | 6    |
|                              |         | <i>Case-control study</i> —If applicable, explain how matching of cases and controls was addressed                                                                                         |      |
|                              |         | <i>Cross-sectional study</i> —If applicable, describe analytical methods taking account of sampling strategy                                                                               |      |
|                              |         | (e) Describe any sensitivity analyses                                                                                                                                                      |      |

**Results**

|                  |     |                                                                                                                                                                                                              |     |
|------------------|-----|--------------------------------------------------------------------------------------------------------------------------------------------------------------------------------------------------------------|-----|
| Participants     | 13* | (a) Report numbers of individuals at each stage of study—eg numbers potentially eligible, examined for eligibility, confirmed eligible, included in the study, completing follow-up, and analysed            | 7   |
|                  |     | (b) Give reasons for non-participation at each stage                                                                                                                                                         | -   |
|                  |     | (c) Consider use of a flow diagram                                                                                                                                                                           | -   |
| Descriptive data | 14* | (a) Give characteristics of study participants (eg demographic, clinical, social) and information on exposures and potential confounders                                                                     | 7-8 |
|                  |     | (b) Indicate number of participants with missing data for each variable of interest                                                                                                                          | -   |
|                  |     | (c) <i>Cohort study</i> —Summarise follow-up time (eg, average and total amount)                                                                                                                             |     |
| Outcome data     | 15* | <i>Cohort study</i> —Report numbers of outcome events or summary measures over time                                                                                                                          |     |
|                  |     | <i>Case-control study</i> —Report numbers in each exposure category, or summary measures of exposure                                                                                                         |     |
|                  |     | <i>Cross-sectional study</i> —Report numbers of outcome events or summary measures                                                                                                                           | 7-8 |
| Main results     | 16  | (a) Give unadjusted estimates and, if applicable, confounder-adjusted estimates and their precision (eg, 95% confidence interval). Make clear which confounders were adjusted for and why they were included | 7-8 |
|                  |     | (b) Report category boundaries when continuous variables were categorized                                                                                                                                    | 7-8 |
|                  |     | (c) If relevant, consider translating estimates of relative risk into absolute risk for a meaningful time period                                                                                             |     |
| Other analyses   | 17  | Report other analyses done—eg analyses of subgroups and interactions, and sensitivity analyses                                                                                                               |     |

**Discussion**

|                  |    |                                                                                                                                                                            |     |
|------------------|----|----------------------------------------------------------------------------------------------------------------------------------------------------------------------------|-----|
| Key results      | 18 | Summarise key results with reference to study objectives                                                                                                                   | 8   |
| Limitations      | 19 | Discuss limitations of the study, taking into account sources of potential bias or imprecision. Discuss both direction and magnitude of any potential bias                 | 8-9 |
| Interpretation   | 20 | Give a cautious overall interpretation of results considering objectives, limitations, multiplicity of analyses, results from similar studies, and other relevant evidence | 8-9 |
| Generalisability | 21 | Discuss the generalisability (external validity) of the study results                                                                                                      | 8-9 |

**Other information**

|         |    |                                                                                                                                                               |   |
|---------|----|---------------------------------------------------------------------------------------------------------------------------------------------------------------|---|
| Funding | 22 | Give the source of funding and the role of the funders for the present study and, if applicable, for the original study on which the present article is based | 1 |
|---------|----|---------------------------------------------------------------------------------------------------------------------------------------------------------------|---|

\*Give information separately for cases and controls in case-control studies and, if applicable, for exposed and unexposed groups in cohort and cross-sectional studies.

**Note:** An Explanation and Elaboration article discusses each checklist item and gives methodological background and published examples of transparent reporting. The STROBE checklist is best used in conjunction with this article (freely available on the Web sites of PLoS Medicine at <http://www.plosmedicine.org/>, Annals of Internal Medicine at <http://www.annals.org/>, and Epidemiology at <http://www.epidem.com/>). Information on the STROBE Initiative is available at [www.strobe-statement.org](http://www.strobe-statement.org).
